# Supplementary material for: Chiral and non-conjugated fluorescent salen ligands: AIE, anion probes, chiral recognition of unprotected amino acids, and cell imaging applications
Source: Royal Society of Chemistry journal article supplement (doi:10.1039/c7ra08267c), 2017-01-01
Supplement: c7ra08267c1.pdf [file c7ra08267c1.pdf]

## Supporting Information

### **Chiral and non-conjugated fluorescent Salen ligands: AIE, anion probes, chiral recognition of unprotected amino acids, and cell imaging applications**

*Guangyu Shen, Gou Fei, Jinghui Cheng, Xiaohong Zhang, Xiangge Zhou, and Haifeng Xiang\**

College of Chemistry, Sichuan University, Chengdu, 610041, China.

## Experimental Section

**Materials and Instrumentation.** All reagents were purchased from commercial suppliers and used without further purification. All the Salen ligands were prepared according to previous reports.<sup>14</sup> <sup>1</sup>H NMR (400 MHz) spectra were recorded in CDCl<sub>3</sub> or DMSO-d<sub>6</sub>. Chemical shifts are reported in ppm using tetramethylsilane as internal standard. UV/vis absorption spectra were recorded using a U5100 (Hitachi) spectrophotometer with quartz cuvettes of 1 cm pathlength. Fluorescence spectra were obtained using F-7000 Fluorescence spectrophotometer (Hitachi) at room temperature. The slit width was 5 nm and 2.5 nm for excitation and emission. The photon multiplier voltage was 400 V. CD spectra were recorded using a Chirascan plus qCD (Applied Photophysics) at room temperature. Samples in solution and powder were contained in 1 cm path length quartz cuvettes (3.5 mL volume) and quartz tube, respectively. The single-crystals of **3-F-Cy**, **3-F-(R,R)Cy**, **3-F-(S,S)Cy**, **3-F-diPh**, and **3-Cl-diPh**, were obtained by a slow diffusion/evaporation of CH<sub>2</sub>Cl<sub>2</sub>/ethyl acetate/hexane solution at room temperature during about two weeks.

**Measurement of Fluorescence Quantum Yield ( $\Phi$ ).** The quantum yield of a solution sample was measured by the optical dilute method of Demas and Crosby<sup>18</sup> with a standard of quinine sulfate ( $\Phi_r = 0.55$ , quinine in 0.05 mol dm<sup>-3</sup> sulfuric acid) calculated by:  $\Phi_s = \Phi_r(B_r/B_s)(n_s/n_r)^2(D_s/D_r)$ , where the subscripts s and r refer to the sample and reference standard solution respectively;  $n$  is the refractive index of the solvents;  $D$  is the integrated intensity. The excitation intensity  $B$  is calculated by:  $B = 1 - 10^{-A L}$ , where  $A$  is the absorbance at the excitation wavelength and  $L$  is the optical path length ( $L = 1$  cm in all cases). The refractive indices of the solvents at room temperature are taken from standard source. Errors for  $\Phi$  values ( $\pm 10\%$ ) are estimated. The quantum yield of a solid sample was measured by an integrating sphere.

**Computational Details.** Calculations were carried out using the Gaussian 09 software package (B3LYP 6-31G(d,p)). The geometry optimization and absorption transition and spectrum were carried out by DFT and TD-DFT, respectively. The theoretical modelling was performed in the isolated molecule approximation ignoring the effect of the aggregation state or solvent. For the atoms of **3-F-Cy**, the standard split-valence basis sets B3LYP 6-31G(d,p) augmented with polarization d-functions for the non-hydrogen atoms and p-functions for the hydrogen atoms were used. Full geometry optimization corresponding to the minima on the

potential energy surface (PES) was conducted until a gradient of  $10^{-5}$  at.u. The spin multiplicities and charges of the **3-F-Cy** were set equal to 1 and 0, respectively. The spin multiplicities and charges of the **3-F-Cy** (in form of  $O^-$ ) were set equal to 1 and  $-2$ , respectively. The other parameters were set to default values.

**Cell Culture Methods and Imaging.** The imaging of HeLa cells was finished by Fluorescence Vertical Microscope LEICA DM2500. HeLa cells were cultured in dulbecco's modified eagle medium (DMEM) supplemented with 10 % fetal bovine serum, penicillin ( $100 \text{ units mL}^{-1}$ ), streptomycin ( $100 \text{ mg mL}^{-1}$ ) and 5 %  $\text{CO}_2$  at  $37 \text{ }^\circ\text{C}$ . After removing the incubating media and rinse with PBS for three times, the cells were incubated with the dye ( $1.0 \times 10^{-5} \text{ mol dm}^{-3}$ ) in PBS for 2 h at room temperature. Then, the cells were washed three times with PBS and incubated with aqueous alkali for 20 min. At last, the cells were imaged with confocal microscope.

**Measurement of Anion hosts/probes:** Anion titration experiment was started with the dye (10 mL) of known concentration ( $1.0 \times 10^{-5} \text{ mol dm}^{-3}$  in DMSO). For the titration, various sodium or potassium salts ( $1.0\text{--}0.10 \text{ mol dm}^{-3}$  in water) were added by a microsyringe. All types of absorption and fluorescence measurement were monitored at about 1 hours after the addition of the anion to the dye solution at room temperature.

**Measurement of Chirality amino acid hosts/probes:** Anion titration experiment was started with the dye (10 mL) of known concentration ( $1.0 \times 10^{-5} \text{ mol dm}^{-3}$  in DMSO). For the titration, various D- or L-amino acids ( $5.0 \times 10^{-2}\text{--}5.0 \times 10^{-1} \text{ mol dm}^{-3}$  in water) were added by a microsyringe. In order to improve the solubility of amino acids in DMSO, ultrasonic treatment was adopted. All types of absorption and fluorescence measurement were monitored at about 1 hours after the addition of the anion to the dye solution at room temperature.

**Synthesis of Organic Dyes:** Salen ligands were prepared by a similar method according to previous reports.<sup>14</sup> The mixture of salicylaldehyde or salicylaldehyde derivatives (2.1 mmol) and the corresponding diamine (1.0 mmol) in 20 mL ethanol solution was refluxed at  $78 \text{ }^\circ\text{C}$  for 5 h. After the reaction was complete, the mixture was cooled to  $0 \text{ }^\circ\text{C}$  and then the product in crystal or powder was collected by filtration.

**Cy** (74% yield):  $^1\text{H NMR}$  (400 MHz,  $\text{CDCl}_3$ )  $\delta$  13.40 (s, 2H), 8.26 (s, 2H), 7.36 – 6.73 (m, 8H), 3.45 – 3.11 (m, 2H), 2.18 – 1.25 (m, 8H).  $^{13}\text{C NMR}$  (101 MHz,  $\text{CDCl}_3$ )  $\delta$  164.44, 161.11, 132.23, 131.48, 118.64, 118.52, 116.77, 72.63, 33.10, 24.18. HRMS (ESI): Calculated for

$C_{20}H_{22}N_2O_2$   $[[M+Na]^+]$  345.1579, found 345.1588. Anal. Calcd. (Found): C, 74.51 (74.48); H, 6.88 (6.91); N, 8.69 (8.66).

**(R,R)Cy** (77% yield):  $^1H$  NMR (400 MHz,  $CDCl_3$ )  $\delta$  13.41 (s, 2H), 8.26 (s, 2H), 7.36 – 6.74 (m, 8H), 3.45 – 3.12 (m, 2H), 2.17 – 1.25 (m, 8H).  $^{13}C$  NMR (101 MHz,  $CDCl_3$ )  $\delta$  164.46, 161.11, 132.23, 131.47, 118.64, 118.52, 116.77, 72.63, 33.10, 24.18. HRMS (ESI):Calculated for  $C_{20}H_{22}N_2O_2$   $[[M+Na]^+]$  345.1579, found 345.1588. Anal. Calcd. (Found): C, 74.51 (74.45); H, 6.88 (6.94); N, 8.69 (8.71).

**(S,S)Cy** (70% yield):  $^1H$  NMR (400 MHz,  $CDCl_3$ )  $\delta$  13.40 (s, 2H), 8.26 (s, 2H), 7.36 – 6.73 (m, 8H), 3.44 – 3.11 (m, 2H), 2.18 – 1.25 (m, 8H).  $^{13}C$  NMR (101 MHz,  $CDCl_3$ )  $\delta$  164.44, 161.10, 132.25, 131.48, 118.65, 118.52, 116.77, 72.63, 33.10, 24.18. HRMS (ESI):Calculated for  $C_{20}H_{22}N_2O_2$   $[[M+Na]^+]$  345.1579, found 345.1588. Anal. Calcd. (Found): C, 74.51 (74.47); H, 6.88 (6.90); N, 8.69 (8.67).

**3-F-Cy** (75% yield):  $^1H$  NMR (400 MHz,  $CDCl_3$ )  $\delta$  13.67 (s, 2H), 8.26 (s, 2H), 7.07 (ddd,  $J = 10.9, 8.1, 1.4$  Hz, 2H), 6.93 (dt,  $J = 7.9, 1.2$  Hz, 2H), 6.71 (td,  $J = 7.8, 4.5$  Hz, 2H), 3.37 – 3.30 (m, 2H), 2.03 – 1.38 (m, 8H).  $^{13}C$  NMR (101 MHz,  $CDCl_3$ )  $\delta$  164.54, 152.46, 149.95, 126.48, 120.15, 118.52, 117.81, 72.42, 32.97, 24.04. HRMS (ESI):Calculated for  $C_{20}H_{20}F_2N_2O_2$   $[[M+Na]^+]$  381.1391, found 381.1366. Anal. Calcd. (Found): C, 67.03 (67.06); H, 5.62 (5.65); N, 7.82 (7.89).

**3-F-(R,R)Cy** (70% yield):  $^1H$  NMR (400 MHz,  $CDCl_3$ )  $\delta$  13.68 (s, 2H), 8.26 (s, 2H), 7.07 (ddd,  $J = 10.9, 8.1, 1.4$  Hz, 2H), 6.94 (dt,  $J = 7.9, 1.2$  Hz, 2H), 6.71 (td,  $J = 7.8, 4.5$  Hz, 2H), 3.47 – 3.16 (m, 2H), 2.05 – 1.38 (m, 8H).  $^{13}C$  NMR (101 MHz,  $CDCl_3$ )  $\delta$  164.54, 152.46, 149.95, 126.47, 120.15, 118.52, 117.81, 72.42, 32.97, 24.04. HRMS (ESI):Calculated for  $C_{20}H_{20}F_2N_2O_2$   $[[M+Na]^+]$  381.1391, found 381.1366. Anal. Calcd. (Found): C, 67.03 (67.07); H, 5.62 (5.64); N, 7.82 (7.76).

**3-F-(S,S)Cy** (68% yield):  $^1H$  NMR (400 MHz,  $CDCl_3$ )  $\delta$  13.68 (s, 2H), 8.27 (s, 2H), 7.07 (ddd,  $J = 10.9, 8.1, 1.4$  Hz, 2H), 6.95 (dt,  $J = 7.8, 1.2$  Hz, 2H), 6.71 (td,  $J = 7.9, 4.5$  Hz, 2H), 3.51 – 3.11 (m, 2H), 2.13 – 1.34 (m, 8H).  $^{13}C$  NMR (101 MHz,  $CDCl_3$ )  $\delta$  164.53, 152.46, 149.95, 126.46, 120.15, 118.52, 117.82, 72.42, 32.97, 24.05. HRMS (ESI):Calculated for  $C_{20}H_{20}F_2N_2O_2$   $[[M+Na]^+]$  381.1391, found 381.1366. Anal. Calcd. (Found): C, 67.03 (67.05); H, 5.62 (5.67); N, 7.82 (7.84).

**3-Cl-Cy** (72% yield):  $^1H$  NMR (400 MHz,  $CDCl_3$ )  $\delta$  14.32 (s, 2H), 8.24 (s, 2H), 7.35 (dd,  $J = 7.9, 1.6$  Hz, 2H), 7.08 (dd,  $J = 7.7, 1.6$  Hz, 2H), 6.74 (t,  $J = 7.5$  Hz, 2H), 3.42 – 3.27 (m,

2H), 1.92 – 1.43 (m, 8H). <sup>13</sup>C NMR (101 MHz, CDCl<sub>3</sub>) δ 164.40, 157.55, 132.64, 130.02, 121.58, 118.64, 72.15, 68.46, 32.97, 24.01. HRMS (ESI): Calculated for C<sub>20</sub>H<sub>20</sub>Cl<sub>2</sub>N<sub>2</sub>O<sub>2</sub> [[M+Na]<sup>+</sup>] 413.0799, found 413.0787. Anal. Calcd. (Found): C, 61.39 (61.34); H, 5.15 (5.18); N, 7.16 (7.13).

**3-Cl-(R,R)Cy** (69% yield): <sup>1</sup>H NMR (400 MHz, CDCl<sub>3</sub>) δ 14.32 (s, 2H), 8.24 (s, 2H), 7.35 (dd, *J* = 7.9, 1.6 Hz, 2H), 7.09 (dd, *J* = 7.7, 1.6 Hz, 2H), 6.74 (t, *J* = 7.5 Hz, 2H), 3.39 – 3.26 (m, 2H), 1.92 – 1.43 (m, 8H). <sup>13</sup>C NMR (101 MHz, CDCl<sub>3</sub>) δ 164.40, 157.55, 132.64, 130.02, 121.59, 118.64, 72.15, 68.46, 32.97, 24.01. HRMS (ESI): Calculated for C<sub>20</sub>H<sub>20</sub>Cl<sub>2</sub>N<sub>2</sub>O<sub>2</sub> [[M+Na]<sup>+</sup>] 413.0799, found 413.0787. Anal. Calcd. (Found): C, 61.39 (67.05); H, 5.15 (5.13); N, 7.16 (7.19).

**3-Cl-(S,S)Cy** (72% yield): <sup>1</sup>H NMR (400 MHz, CDCl<sub>3</sub>) δ 14.32 (s, 2H), 8.24 (s, 2H), 7.35 (dd, *J* = 7.9, 1.6 Hz, 2H), 7.08 (dd, *J* = 7.7, 1.6 Hz, 2H), 6.74 (t, *J* = 7.5 Hz, 2H), 3.41 – 3.28 (m, 2H), 1.94 – 1.41 (m, 8H). <sup>13</sup>C NMR (101 MHz, CDCl<sub>3</sub>) δ 164.40, 157.55, 132.64, 130.01, 121.58, 118.64, 72.15, 68.46, 32.97, 24.01. HRMS (ESI): Calculated for C<sub>20</sub>H<sub>20</sub>Cl<sub>2</sub>N<sub>2</sub>O<sub>2</sub> [[M+Na]<sup>+</sup>] 413.0799, found 413.0787. Anal. Calcd. (Found): C, 61.39 (61.43); H, 5.15 (5.17); N, 7.16 (7.15).

**3-*t*-Bu-Cy** (68% yield): <sup>1</sup>H NMR (400 MHz, CDCl<sub>3</sub>) δ 13.95 (s, 2H), 8.34 (s, 2H), 7.28 (dd, *J* = 7.7, 1.6 Hz, 2H), 7.07 (dd, *J* = 7.6, 1.6 Hz, 2H), 6.76 (t, *J* = 7.6 Hz, 2H), 3.58 (m, 2H), 2.11 – 1.53 (m, 8H), 1.39 (s, 18H). <sup>13</sup>C NMR (101 MHz, CDCl<sub>3</sub>) δ 164.92, 160.54, 137.33, 129.84, 129.25, 118.73, 117.60, 69.32, 34.84, 30.52, 29.34, 22.67. HRMS (ESI): Calculated for C<sub>20</sub>H<sub>38</sub>N<sub>2</sub>O<sub>2</sub> [[M+Na]<sup>+</sup>] 457.2831, found 457.2826. Anal. Calcd. (Found): C, 77.38 (77.43); H, 8.81 (8.79); N, 6.45 (6.49).

**3-OMe-Cy** (70% yield): <sup>1</sup>H NMR (400 MHz, CDCl<sub>3</sub>) δ 13.87 (s, 2H), 8.24 (s, 2H), 6.87 – 6.71 (m, 6H), 3.86 (s, 6H), 3.35 – 3.26 (m, 2H), 1.98 – 1.43 (m, 8H). <sup>13</sup>C NMR (101 MHz, CDCl<sub>3</sub>) δ 164.75, 151.57, 148.23, 123.15, 118.36, 117.88, 113.78, 72.40, 56.00, 33.02, 24.04. HRMS (ESI): Calculated for C<sub>22</sub>H<sub>26</sub>N<sub>2</sub>O<sub>4</sub> [[M+Na]<sup>+</sup>] 405.1790, found 405.1776. Anal. Calcd. (Found): C, 69.09 (69.12); H, 6.85 (6.91); N, 7.32 (7.28)

**3-NO<sub>2</sub>-Cy** (45% yield): <sup>1</sup>H NMR (400 MHz, DMSO) δ 15.19 (s, 2H), 8.76 (s, 2H), 8.02 (dd, *J* = 8.0, 1.8 Hz, 2H), 7.67 (dd, *J* = 7.7, 1.8 Hz, 2H), 6.69 (t, *J* = 7.8 Hz, 2H), 4.02 – 3.75 (m, 2H), 2.15 – 1.33 (m, 8H). <sup>13</sup>C NMR (101 MHz, DMSO) δ 167.18, 163.12, 140.03, 131.71, 119.75, 113.94, 66.50, 63.69, 31.98, 23.91. HRMS (ESI): Calculated for C<sub>20</sub>H<sub>20</sub>N<sub>4</sub>O<sub>6</sub>

[[M+Na]<sup>+</sup>] 435.1281, found 435.1277. Anal. Calcd. (Found): C, 58.25 (58.23); H, 4.89 (4.87); N, 13.59 (13.57).

**3-NO<sub>2</sub>-(R,R)Cy** (46% yield): <sup>1</sup>H NMR (400 MHz, DMSO) δ 15.19 (s, 2H), 8.76 (s, 2H), 8.01 (dd, *J* = 8.0, 1.8 Hz, 2H), 7.67 (dd, *J* = 7.7, 1.8 Hz, 2H), 6.69 (t, *J* = 7.8 Hz, 2H), 4.01 – 3.75 (m, 2H), 2.16 – 1.33 (m, 8H). <sup>13</sup>C NMR (101 MHz, DMSO) δ 167.18, 163.12, 140.03, 131.71, 119.76, 113.94, 66.50, 63.69, 31.98, 23.91. HRMS (ESI): Calculated for C<sub>20</sub>H<sub>20</sub>N<sub>4</sub>O<sub>6</sub> [[M+Na]<sup>+</sup>] 435.1281, found 435.1277. Anal. Calcd. (Found): C, 58.25 (58.29); H, 4.89 (4.91); N, 13.59 (13.55).

**3-NO<sub>2</sub>-(S,S)Cy** (48% yield): <sup>1</sup>H NMR (400 MHz, DMSO) δ 15.19 (s, 2H), 8.76 (s, 2H), 8.02 (dd, *J* = 8.0, 1.8 Hz, 2H), 7.67 (dd, *J* = 7.7, 1.8 Hz, 2H), 6.69 (t, *J* = 7.8 Hz, 2H), 4.02 – 3.76 (m, 2H), 2.17 – 1.35 (m, 8H). <sup>13</sup>C NMR (101 MHz, DMSO) δ 167.18, 163.12, 140.03, 131.71, 119.75, 113.93, 66.50, 63.69, 31.98, 23.91. HRMS (ESI): Calculated for C<sub>20</sub>H<sub>20</sub>N<sub>4</sub>O<sub>6</sub> [[M+Na]<sup>+</sup>] 435.1281, found 435.1277. Anal. Calcd. (Found): C, 58.25 (58.28); H, 4.89 (4.93); N, 13.59 (13.54).

**4-NEt<sub>2</sub>-Cy** (76% yield): <sup>1</sup>H NMR (400 MHz, CDCl<sub>3</sub>) δ 13.76 (s, 2H), 7.93 (s, 2H), 6.89 (d, *J* = 8.6 Hz, 2H), 6.14 – 5.97 (m, 4H), 3.32 (q, *J* = 6.9 Hz, 8H), 3.21 – 3.10 (m, 2H), 2.04 – 1.34 (m, 8H), 1.14 (t, *J* = 7.0 Hz, 12H). <sup>13</sup>C NMR (101 MHz, CDCl<sub>3</sub>) δ 165.99, 162.74, 151.46, 133.13, 108.20, 102.95, 98.12, 70.79, 44.46, 33.26, 24.36, 12.72. HRMS (ESI): Calculated for C<sub>28</sub>H<sub>40</sub>N<sub>4</sub>O<sub>2</sub> [[M+Na]<sup>+</sup>] 487.3049, found 487.3054. Anal. Calcd. (Found): C, 72.38 (72.35); H, 8.68 (8.72); N, 12.06 (12.11)

**5-OMe-Cy** (62% yield): <sup>1</sup>H NMR (400 MHz, CDCl<sub>3</sub>) δ 12.81 (s, 2H), 8.19 (s, 2H), 6.88 – 6.79 (m, 4H), 6.64 (d, *J* = 2.7 Hz, 2H), 3.70 (s, 6H), 3.33 – 3.21 (m, 2H), 2.03 – 1.35 (m, 8H). <sup>13</sup>C NMR (101 MHz, CDCl<sub>3</sub>) δ 164.50, 155.08, 151.98, 119.41, 118.25, 117.48, 114.81, 72.76, 55.87, 33.05, 24.17. HRMS (ESI): Calculated for C<sub>22</sub>H<sub>26</sub>N<sub>2</sub>O<sub>4</sub> [[M+Na]<sup>+</sup>] 405.1790, found 405.1784. Anal. Calcd. (Found): C, 69.09 (69.11); H, 6.85 (6.89); N, 7.32 (7.35)

**5-NO<sub>2</sub>-Cy** (35% yield): <sup>1</sup>H NMR (400 MHz, DMSO) δ 14.86 (s, 2H), 8.87 (s, 2H), 8.48 (d, *J* = 3.0 Hz, 2H), 8.14 (dd, *J* = 9.4, 3.0 Hz, 2H), 6.85 (d, *J* = 9.4 Hz, 2H), 4.01 (d, *J* = 4.4 Hz, 2H), 1.97 – 1.50 (m, 8H). <sup>13</sup>C NMR (101 MHz, DMSO) δ 172.49, 166.62, 137.15, 130.43, 129.13, 120.67, 116.28, 64.83, 29.74, 21.90. HRMS (ESI): Calculated for C<sub>20</sub>H<sub>20</sub>N<sub>4</sub>O<sub>6</sub> [[M+Na]<sup>+</sup>] 435.1281, found 435.1268. Anal. Calcd. (Found): C, 58.25 (58.28); H, 4.89 (4.92); N, 13.59 (13.62)

**Naph-Cy** (72% yield):  $^1\text{H}$  NMR (400 MHz,  $\text{CDCl}_3$ )  $\delta$  14.65 (s, 2H), 8.76 (s, 2H), 7.74 (d,  $J$  = 8.3 Hz, 2H), 7.53 (d,  $J$  = 9.2 Hz, 2H), 7.46 (dd,  $J$  = 7.9, 1.1 Hz, 2H), 7.30 (ddd,  $J$  = 8.4, 7.0, 1.4 Hz, 2H), 7.13 (ddd,  $J$  = 8.0, 7.1, 1.0 Hz, 2H), 6.89 – 6.82 (m, 2H), 3.47 – 3.33 (m, 2H), 2.25 – 1.39 (m, 8H).  $^{13}\text{C}$  NMR (101 MHz,  $\text{CDCl}_3$ )  $\delta$  172.27, 159.24, 136.50, 133.21, 128.87, 127.84, 126.54, 122.84, 118.43, 107.16, 69.04, 32.68, 24.25. HRMS (ESI): Calculated for  $\text{C}_{28}\text{H}_{26}\text{N}_2\text{O}_2$   $[[\text{M}+\text{Na}]^+]$  445.1892, found 445.1888. Anal. Calcd. (Found): C, 79.59 (79.56); H, 6.20 (6.22); N, 6.63 (6.65)

**3,5-Cl-Cy** (72% yield):  $^1\text{H}$  NMR (400 MHz,  $\text{CDCl}_3$ )  $\delta$  14.18 (s, 2H), 8.18 (s, 2H), 7.35 (d,  $J$  = 2.5 Hz, 2H), 7.08 (d,  $J$  = 2.5 Hz, 2H), 3.41 – 3.32 (m, 2H), 2.01 – 1.39 (m, 8H).  $^{13}\text{C}$  NMR (101 MHz,  $\text{CDCl}_3$ )  $\delta$  163.40, 156.32, 132.35, 129.23, 122.94, 122.64, 119.23, 72.20, 32.88, 23.91. HRMS (ESI): Calculated for  $\text{C}_{20}\text{H}_{18}\text{Cl}_4\text{N}_2\text{O}_2$   $[[\text{M}+\text{Na}]^+]$  481.0020, found 481.0045. Anal. Calcd. (Found): C, 52.20 (52.24); H, 3.94 (3.91); N, 6.09 (6.07).

**3,5-Cl-(R,R)Cy** (70% yield):  $^1\text{H}$  NMR (400 MHz,  $\text{CDCl}_3$ )  $\delta$  14.18 (s, 2H), 8.18 (s, 2H), 7.36 (d,  $J$  = 2.5 Hz, 2H), 7.08 (d,  $J$  = 2.5 Hz, 2H), 3.39 – 3.32 (m, 2H), 2.01 – 1.39 (m, 8H).  $^{13}\text{C}$  NMR (101 MHz,  $\text{CDCl}_3$ )  $\delta$  163.40, 156.31, 132.36, 129.23, 122.94, 122.64, 119.23, 72.20, 32.88, 23.91. HRMS (ESI): Calculated for  $\text{C}_{20}\text{H}_{18}\text{Cl}_4\text{N}_2\text{O}_2$   $[[\text{M}+\text{Na}]^+]$  481.0020, found 481.0066. Anal. Calcd. (Found): C, 52.20 (52.25); H, 3.94 (3.97); N, 6.09 (6.11).

**3,5-Cl-(S,S)Cy** (74% yield):  $^1\text{H}$  NMR (400 MHz,  $\text{CDCl}_3$ )  $\delta$  14.18 (s, 2H), 8.18 (s, 2H), 7.35 (d,  $J$  = 2.5 Hz, 2H), 7.09 (d,  $J$  = 2.5 Hz, 2H), 3.41 – 3.33 (m, 2H), 2.01 – 1.41 (m, 8H).  $^{13}\text{C}$  NMR (101 MHz,  $\text{CDCl}_3$ )  $\delta$  163.41, 156.33, 132.34, 129.24, 122.93, 122.63, 119.23, 72.19, 32.87, 23.91. HRMS (ESI): Calculated for  $\text{C}_{20}\text{H}_{18}\text{Cl}_4\text{N}_2\text{O}_2$   $[[\text{M}+\text{Na}]^+]$  481.0020, found 481.0052. Anal. Calcd. (Found): C, 52.20 (52.18); H, 3.94 (3.95); N, 6.09 (6.12).

**3,5-NO<sub>2</sub>-Cy** (38% yield):  $^1\text{H}$  NMR (400 MHz, DMSO)  $\delta$  13.54 (s, 2H), 8.92 (s, 2H), 8.72 (d,  $J$  = 3.1 Hz, 2H), 8.67 (d,  $J$  = 3.1 Hz, 2H), 4.24 (d,  $J$  = 8.9 Hz, 2H), 2.22 – 1.35 (m, 8H).  $^{13}\text{C}$  NMR (101 MHz, DMSO)  $\delta$  170.16, 168.31, 141.19, 138.06, 130.47, 127.95, 117.55, 63.77, 31.18, 23.86. HRMS (ESI): Calculated for  $\text{C}_{20}\text{H}_{18}\text{N}_6\text{O}_{10}$   $[[\text{M}+\text{Na}]^+]$  525.0982, found 525.0976. Anal. Calcd. (Found): C, 47.81 (47.79); H, 3.61 (3.59); N, 16.73 (16.70).

**3,5-NO<sub>2</sub>-(R,R)Cy** (37% yield):  $^1\text{H}$  NMR (400 MHz, DMSO)  $\delta$  13.54 (s, 2H), 8.92 (s, 2H), 8.72 (d,  $J$  = 3.1 Hz, 2H), 8.67 (d,  $J$  = 3.1 Hz, 2H), 4.24 (d,  $J$  = 8.9 Hz, 2H), 2.21 – 1.34 (m, 8H).  $^{13}\text{C}$  NMR (101 MHz, DMSO)  $\delta$  170.16, 168.31, 141.19, 138.06, 130.47, 127.95, 117.55, 63.78, 31.18, 23.86. HRMS (ESI): Calculated for  $\text{C}_{20}\text{H}_{18}\text{N}_6\text{O}_{10}$   $[[\text{M}+\text{Na}]^+]$  525.0982, found 525.0976. Anal. Calcd. (Found): C, 47.81 (47.83); H, 3.61 (3.63); N, 16.73 (16.69).

**3,5-NO<sub>2</sub>-(S,S)Cy** (38% yield): <sup>1</sup>H NMR (400 MHz, DMSO) δ 13.54 (s, 2H), 8.92 (s, 2H), 8.72 (d, *J* = 3.1 Hz, 2H), 8.67 (d, *J* = 3.1 Hz, 2H), 4.24 (d, *J* = 8.9 Hz, 2H), 2.22 – 1.34 (m, 8H). <sup>13</sup>C NMR (101 MHz, DMSO) δ 170.16, 168.31, 141.19, 138.06, 130.47, 127.95, 117.55, 63.77, 31.18, 23.86. HRMS (ESI): Calculated for C<sub>20</sub>H<sub>18</sub>N<sub>6</sub>O<sub>10</sub> [[M+Na]<sup>+</sup>] 525.0982, found 525.0976. Anal. Calcd. (Found): C, 47.81 (47.80); H, 3.61 (3.65); N, 16.73 (16.76).

**diPh** (75% yield): <sup>1</sup>H NMR (400 MHz, CDCl<sub>3</sub>) δ 13.31 (s, 2H), 8.32 (s, 2H), 7.30 – 7.13 (m, 14H), 6.96 (d, *J* = 8.1 Hz, 2H), 6.80 (td, *J* = 7.5, 1.0 Hz, 2H), 4.75 (s, 2H). <sup>13</sup>C NMR (101 MHz, CDCl<sub>3</sub>) δ 166.20, 160.96, 139.34, 132.66, 131.80, 128.41, 127.87, 127.68, 118.79, 118.56, 116.93, 80.18. HRMS (ESI): Calculated for C<sub>28</sub>H<sub>24</sub>N<sub>2</sub>O<sub>2</sub> [[M+Na]<sup>+</sup>] 443.1735, found 443.1728. Anal. Calcd. (Found): C, 79.98 (80.02); H, 5.75 (5.72); N, 6.66 (6.59).

**(R,R)diPh** (74% yield): <sup>1</sup>H NMR (400 MHz, CDCl<sub>3</sub>) δ 13.31 (s, 2H), 8.32 (s, 2H), 7.30 – 7.11 (m, 14H), 6.96 (d, *J* = 8.1 Hz, 2H), 6.80 (td, *J* = 7.5, 0.9 Hz, 2H), 4.75 (s, 2H). <sup>13</sup>C NMR (101 MHz, CDCl<sub>3</sub>) δ 166.21, 160.96, 139.34, 132.66, 131.80, 128.41, 127.87, 127.68, 118.79, 118.56, 116.93, 80.18. HRMS (ESI): Calculated for C<sub>28</sub>H<sub>24</sub>N<sub>2</sub>O<sub>2</sub> [[M+Na]<sup>+</sup>] 443.1735, found 443.1731. Anal. Calcd. (Found): C, 79.98 (79.95); H, 5.75 (5.72); N, 6.66 (6.71).

**(S,S)diPh** (71% yield): <sup>1</sup>H NMR (400 MHz, CDCl<sub>3</sub>) δ 13.31 (s, 2H), 8.32 (s, 2H), 7.30 – 7.12 (m, 14H), 6.96 (d, *J* = 8.0 Hz, 2H), 6.80 (td, *J* = 7.5, 1.0 Hz, 2H), 4.75 (s, 2H). <sup>13</sup>C NMR (101 MHz, CDCl<sub>3</sub>) δ 166.21, 160.97, 139.34, 132.66, 131.80, 128.41, 127.87, 127.68, 118.79, 118.56, 116.93, 80.18. HRMS (ESI): Calculated for C<sub>28</sub>H<sub>24</sub>N<sub>2</sub>O<sub>2</sub> [[M+Na]<sup>+</sup>] 443.1735, found 443.1735. Anal. Calcd. (Found): C, 79.98 (80.0); H, 5.75 (5.69); N, 6.66 (6.68).

**3-F-diPh** (63% yield): <sup>1</sup>H NMR (400 MHz, CDCl<sub>3</sub>) δ 13.58 (s, 2H), 8.37 (s, 2H), 7.24 – 7.13 (m, 10H), 7.10 (ddd, *J* = 10.9, 8.1, 1.5 Hz, 2H), 6.94 (d, *J* = 7.9 Hz, 2H), 6.74 (td, *J* = 8.0, 4.5 Hz, 2H), 4.74 (s, 2H). <sup>13</sup>C NMR (101 MHz, CDCl<sub>3</sub>) δ 165.88, 152.38, 149.95, 149.47, 138.71, 128.55, 127.89, 126.77, 120.24, 118.94, 118.24, 80.13. HRMS (ESI): Calculated for C<sub>28</sub>H<sub>22</sub>F<sub>2</sub>N<sub>2</sub>O<sub>2</sub> [[M+Na]<sup>+</sup>] 479.1547, found 479.1544. Anal. Calcd. (Found): C, 73.67 (73.65); H, 4.86 (4.88); N, 6.14 (6.16).

**3-F-(R,R)diPh** (65% yield): <sup>1</sup>H NMR (400 MHz, CDCl<sub>3</sub>) δ 13.59 (s, 2H), 8.37 (s, 2H), 7.27 – 7.13 (m, 10H), 7.09 (ddd, *J* = 9.8, 8.1, 1.3 Hz, 2H), 6.96 (d, *J* = 7.8 Hz, 2H), 6.73 (td, *J* = 7.9, 4.5 Hz, 2H), 4.74 (s, 2H). <sup>13</sup>C NMR (101 MHz, CDCl<sub>3</sub>) δ 165.89, 152.38, 149.95, 149.47, 138.72, 128.55, 127.89, 126.77, 120.24, 118.94, 118.24, 80.13. HRMS (ESI): Calculated for C<sub>28</sub>H<sub>22</sub>F<sub>2</sub>N<sub>2</sub>O<sub>2</sub> [[M+Na]<sup>+</sup>] 479.1547, found 479.1565. Anal. Calcd. (Found): C, 73.67 (73.63); H, 4.86 (4.89); N, 6.14 (6.18).



**3-F-(S,S)diPh** (61% yield):  $^1\text{H}$  NMR (400 MHz,  $\text{CDCl}_3$ )  $\delta$  13.59 (s, 2H), 8.37 (s, 2H), 7.27 – 7.13 (m, 10H), 7.09 (ddd,  $J = 9.8, 8.1, 1.3$  Hz, 2H), 6.96 (d,  $J = 7.8$  Hz, 2H), 6.73 (td,  $J = 7.9, 4.5$  Hz, 2H), 4.74 (s, 2H).  $^{13}\text{C}$  NMR (101 MHz,  $\text{CDCl}_3$ )  $\delta$  165.88, 152.38, 149.94, 149.47, 138.72, 128.55, 127.89, 126.77, 120.24, 118.94, 118.24, 80.13. HRMS (ESI): Calculated for  $\text{C}_{28}\text{H}_{22}\text{F}_2\text{N}_2\text{O}_2$   $[[\text{M}+\text{Na}]^+]$  479.1547, found 479.1542. Anal. Calcd. (Found): C, 73.67 (73.67); H, 4.86 (4.92); N, 6.14 (6.10).

**3-Cl-diPh** (67% yield):  $^1\text{H}$  NMR (400 MHz,  $\text{CDCl}_3$ )  $\delta$  14.16 (s, 2H), 8.36 (s, 2H), 7.37 (dd,  $J = 7.9, 1.5$  Hz, 2H), 7.25 – 7.13 (m, 2H), 7.11 (dd,  $J = 7.7, 1.5$  Hz, 10H), 6.77 (t,  $J = 7.8$  Hz, 2H), 4.73 (s, 2H).  $^{13}\text{C}$  NMR (101 MHz,  $\text{CDCl}_3$ )  $\delta$  165.65, 156.87, 138.51, 132.93, 130.30, 128.56, 127.94, 127.82, 121.42, 119.28, 119.11, 80.13. HRMS (ESI): Calculated for  $\text{C}_{28}\text{H}_{22}\text{Cl}_2\text{N}_2\text{O}_2$   $[[\text{M}+\text{Na}]^+]$  511.0956, found 579.0156. Anal. Calcd. (Found): C, 68.91 (68.88); H, 5.18 (5.23); N, 5.54 (5.57).

**3-Cl-(R,R)diPh** (63% yield):  $^1\text{H}$  NMR (400 MHz,  $\text{CDCl}_3$ )  $\delta$  14.16 (s, 2H), 8.36 (s, 2H), 7.37 (dd,  $J = 7.9, 1.5$  Hz, 2H), 7.25 – 7.13 (m, 2H), 7.11 (dd,  $J = 7.7, 1.5$  Hz, 10H), 6.77 (t,  $J = 7.8$  Hz, 2H), 4.73 (s, 2H).  $^{13}\text{C}$  NMR (101 MHz,  $\text{CDCl}_3$ )  $\delta$  165.65, 156.87, 138.50, 132.93, 130.30, 128.56, 127.95, 127.82, 121.42, 119.28, 119.11, 80.13. HRMS (ESI): Calculated for  $\text{C}_{28}\text{H}_{22}\text{Cl}_2\text{N}_2\text{O}_2$   $[[\text{M}+\text{Na}]^+]$  511.0956, found 579.0177. Anal. Calcd. (Found): C, 68.91 (68.94); H, 5.18 (5.14); N, 5.54 (5.58).

**3-Cl-(S,S)diPh** (65% yield):  $^1\text{H}$  NMR (400 MHz,  $\text{CDCl}_3$ )  $\delta$  14.17 (s, 2H), 8.36 (s, 2H), 7.36 (dd,  $J = 7.9, 1.6$  Hz, 2H), 7.24 – 7.13 (m, 10H), 7.11 (dd,  $J = 7.7, 1.5$  Hz, 2H), 6.77 (t,  $J = 7.8$  Hz, 2H), 4.73 (s, 2H).  $^{13}\text{C}$  NMR (101 MHz,  $\text{CDCl}_3$ )  $\delta$  165.66, 156.87, 138.50, 132.91, 130.31, 128.56, 127.94, 127.82, 121.42, 119.27, 119.11, 80.13. HRMS (ESI): Calculated for  $\text{C}_{28}\text{H}_{22}\text{Cl}_2\text{N}_2\text{O}_2$   $[[\text{M}+\text{Na}]^+]$  511.0956, found 579.0978. Anal. Calcd. (Found): C, 68.91 (68.92); H, 5.18 (5.24); N, 5.54 (5.59).

**3-NO<sub>2</sub>-diPh** (31% yield):  $^1\text{H}$  NMR (400 MHz, DMSO)  $\delta$  15.32 (s, 2H), 8.80 (s, 2H), 8.03 (d,  $J = 7.9$  Hz, 2H), 7.90 (d,  $J = 7.8$  Hz, 2H), 7.75 – 7.23 (m, 10H), 6.93 (t,  $J = 7.8$  Hz, 2H), 5.85 (s, 2H). HRMS (ESI): Calculated for  $\text{C}_{28}\text{H}_{22}\text{N}_4\text{O}_6$   $[[\text{M}+\text{Na}]^+]$  533.1437, found 533.1439. Anal. Calcd. (Found): C, 65.88 (65.86); H, 4.34 (4.37); N, 10.97 (10.93).

**4-NEt<sub>2</sub>-diPh** (81% yield):  $^1\text{H}$  NMR (400 MHz,  $\text{CDCl}_3$ )  $\delta$  13.85 (s, 2H), 8.07 (s, 2H), 7.23 – 6.04 (m, 16H), 4.60 (s, 2H), 3.34 (q,  $J = 7.1$  Hz, 8H), 1.16 (t,  $J = 7.1$  Hz, 12H).  $^{13}\text{C}$  NMR (101 MHz,  $\text{CDCl}_3$ )  $\delta$  164.32, 163.99, 151.24, 140.54, 133.16, 128.12, 127.93, 127.18, 108.37, 103.07, 97.90, 79.41, 44.51, 12.71. HRMS (ESI): Calculated for  $\text{C}_{36}\text{H}_{42}\text{N}_4\text{O}_2$   $[[\text{M}+\text{Na}]^+]$

585.3205, found 585.3199 Anal. Calcd. (Found): C, 76.84 (76.87); H, 7.52 (7.54); N, 9.96 (9.98).

**5-NO<sub>2</sub>-diPh** (38% yield): <sup>1</sup>H NMR (400 MHz, DMSO) δ 14.50 (s, 2H), 8.75 (s, 2H), 8.42 (t, *J* = 7.9 Hz, 2H), 8.16 (dd, *J* = 9.3, 2.9 Hz, 2H), 7.42 – 7.19 (m, 10H), 6.99 (d, *J* = 9.3 Hz, 2H), 5.34 (s, 2H). <sup>13</sup>C NMR (101 MHz, DMSO) δ 168.83, 165.99, 139.02, 138.71, 129.03, 128.90, 128.85, 128.34, 128.18, 119.34, 117.69, 75.83. HRMS (ESI): Calculated for C<sub>28</sub>H<sub>22</sub>N<sub>4</sub>O<sub>6</sub> [[M+Na]<sup>+</sup>] 533.1437, found 533.1446. Anal. Calcd. (Found): C, 65.88 (65.90); H, 4.34 (4.37); N, 10.97 (11.02).

**Naph-diPh** (67% yield): <sup>1</sup>H NMR (400 MHz, CDCl<sub>3</sub>) δ 15.24 (s, 2H), 9.00 (s, 2H), 7.82 (d, *J* = 8.4 Hz, 2H), 7.62 (d, *J* = 9.1 Hz, 2H), 7.57 (d, *J* = 7.7 Hz, 2H), 7.40 – 7.18 (m, 14H), 7.03 (d, *J* = 9.1 Hz, 2H), 4.94 (s, 2H). <sup>13</sup>C NMR (101 MHz, CDCl<sub>3</sub>) δ 168.11, 161.25, 138.62, 135.64, 132.89, 128.97, 128.70, 128.02, 127.69, 127.67, 127.07, 123.07, 121.48, 118.83, 108.04, 78.01. HRMS (ESI): Calculated for C<sub>36</sub>H<sub>28</sub>N<sub>2</sub>O<sub>2</sub> [[M+Na]<sup>+</sup>] 543.2048, found 543.2042. Anal. Calcd. (Found): C, 83.05 (83.08); H, 5.42 (5.45); N, 5.38 (5.35)

**3,5-Cl-diPh** (62% yield): <sup>1</sup>H NMR (400 MHz, CDCl<sub>3</sub>) δ 14.06 (s, 2H), 8.27 (s, 2H), 7.39 (d, *J* = 2.5 Hz, 2H), 7.24 – 7.12 (m, 10H), 7.10 (d, *J* = 2.5 Hz, 2H), 4.76 (s, 2H). <sup>13</sup>C NMR (101 MHz, CDCl<sub>3</sub>) δ 164.69, 155.72, 138.06, 132.64, 129.49, 128.70, 128.19, 127.73, 123.40, 122.57, 119.44, 79.98. HRMS (ESI): Calculated for C<sub>28</sub>H<sub>20</sub>Cl<sub>4</sub>N<sub>2</sub>O<sub>2</sub> [[M+Na]<sup>+</sup>] 579.0102, found 579.0156. Anal. Calcd. (Found): C, 60.24 (60.28); H, 3.61 (3.59); N, 5.02 (5.05).

**3,5-Cl-(R,R)diPh** (64% yield): <sup>1</sup>H NMR (400 MHz, CDCl<sub>3</sub>) δ 14.06 (s, 2H), 8.27 (s, 2H), 7.38 (d, *J* = 2.4 Hz, 2H), 7.25 – 7.11 (m, 10H), 7.09 (d, *J* = 2.5 Hz, 2H), 4.76 (s, 2H). <sup>13</sup>C NMR (101 MHz, CDCl<sub>3</sub>) δ 164.69 (s), 155.72, 138.05, 132.64, 129.49, 128.70, 128.19, 127.73, 123.40, 122.55, 119.44, 79.98. HRMS (ESI): Calculated for C<sub>28</sub>H<sub>20</sub>C<sub>14</sub>N<sub>2</sub>O<sub>2</sub> [[M+Na]<sup>+</sup>] 579.0177, found 579.0165. Anal. Calcd. (Found): C, 60.24 (60.20); H, 3.61 (3.64); N, 5.02 (5.08).

**3,5-Cl-(S,S)diPh** (60% yield): <sup>1</sup>H NMR (400 MHz, CDCl<sub>3</sub>) δ 14.06 (s, 2H), 8.27 (s, 2H), 7.38 (d, *J* = 2.5 Hz, 2H), 7.25 – 7.12 (m, 10H), 7.09 (d, *J* = 2.5 Hz, 2H), 4.76 (s, 2H). <sup>13</sup>C NMR (101 MHz, CDCl<sub>3</sub>) δ 164.69, 155.72, 138.05, 132.64, 129.49, 128.70, 128.19, 127.73, 123.40, 122.55, 119.44, 79.98. HRMS (ESI): Calculated for C<sub>28</sub>H<sub>20</sub>C<sub>14</sub>N<sub>2</sub>O<sub>2</sub> [[M+Na]<sup>+</sup>] 579.0177, found 579.0165. Anal. Calcd. (Found): C, 60.24 (60.26); H, 3.61 (3.58); N, 5.02 (5.06).

**3,5-NO<sub>2</sub>-diPh** (31% yield): <sup>1</sup>H NMR (400 MHz, DMSO) δ 14.13 (s, 2H), 8.80 (s, 2H), 8.67 – 8.54 (m, 12H), 8.28 (d, *J* = 3.3 Hz, 2H), 5.72 (s, 2H). HRMS (ESI): Calculated for C<sub>28</sub>H<sub>20</sub>N<sub>6</sub>O<sub>10</sub> [[M+Na]<sup>+</sup>] 623.1139, found 623.1151. Anal. Calcd. (Found): C, 56.00 (56.05); H, 3.36 (3.40); N, 14.00 (14.03).

**Table. S1** Photophysical data of **Cys**. Sample without emission data mean that it is non-emissive.

|                     | medium | $\lambda_{\text{abs}}/\text{nm}$ ( $\epsilon/\text{dm}^3 \text{ mol}^{-1} \text{ cm}^{-1}$ ) | $\lambda_{\text{em}}/\text{nm}$ | Stokes shift /nm | $\Phi$ | $f/\%$ |
|---------------------|--------|----------------------------------------------------------------------------------------------|---------------------------------|------------------|--------|--------|
| <b>Cy</b>           | MeCN   | 253(2.37×10 <sup>4</sup> ); 316(9.00×10 <sup>3</sup> )                                       | 457                             |                  | 0.0023 |        |
|                     | Water  | 338; 394                                                                                     | 495                             | 101              | 0.015  | 90     |
|                     | Solid  |                                                                                              | 502                             |                  | 0.018  |        |
| <b>(R,R)Cy</b>      | MeCN   | 253(2.31×10 <sup>4</sup> ); 316(9.10×10 <sup>3</sup> )                                       | 457                             |                  | 0.0021 |        |
|                     | Water  | 338; 394                                                                                     | 496                             | 102              | 0.014  | 90     |
|                     | Solid  |                                                                                              | 503                             |                  | 0.016  |        |
| <b>(S,S)Cy</b>      | MeCN   | 253(2.42×10 <sup>4</sup> ); 316(8.90×10 <sup>3</sup> )                                       | 457                             |                  | 0.0026 |        |
|                     | Water  | 338; 394                                                                                     | 495                             | 101              | 0.016  | 90     |
|                     | Solid  |                                                                                              | 502                             |                  | 0.018  |        |
| <b>3-F-Cy</b>       | MeCN   | 253(2.51×10 <sup>4</sup> ); 316(5.30×10 <sup>3</sup> )                                       | 458                             |                  | 0.0088 |        |
|                     | Water  | 372                                                                                          | 501                             | 129              | 0.020  | 90     |
|                     | Solid  |                                                                                              | 509                             |                  | 0.060  |        |
| <b>3-F-(R,R)Cy</b>  | MeCN   | 253(2.54×10 <sup>4</sup> ); 316(5.30×10 <sup>3</sup> )                                       | 458                             |                  | 0.0090 |        |
|                     | Water  | 372                                                                                          | 502                             | 130              | 0.022  | 90     |
|                     | Solid  |                                                                                              | 509                             |                  | 0.059  |        |
| <b>3-F-(S,S)Cy</b>  | MeCN   | 253(2.47×10 <sup>4</sup> ); 316(5.20×10 <sup>3</sup> )                                       | 458                             |                  | 0.0093 |        |
|                     | Water  | 373                                                                                          | 502                             | 129              | 0.023  | 90     |
|                     | Solid  |                                                                                              | 508                             |                  | 0.062  |        |
| <b>3-Cl-Cy</b>      | MeCN   | 256(2.15×10 <sup>4</sup> ); 323(6.60×10 <sup>3</sup> )                                       | 461                             |                  | 0.0086 |        |
|                     | Water  | 383                                                                                          | 506                             | 123              | 0.025  |        |
|                     | Solid  |                                                                                              | 520                             |                  | 0.14   | 90     |
| <b>3-Cl-(R,R)Cy</b> | MeCN   | 257(2.09×10 <sup>4</sup> ); 323(6.80×10 <sup>3</sup> )                                       | 460                             |                  | 0.0088 |        |
|                     | Water  | 383                                                                                          | 506                             | 123              | 0.025  |        |
|                     | Solid  |                                                                                              | 520                             |                  | 0.14   | 90     |
| <b>3-Cl-(S,S)Cy</b> | MeCN   | 256(2.14×10 <sup>4</sup> ); 323(6.20×10 <sup>3</sup> )                                       | 461                             |                  | 0.0090 |        |

|                                 |       |                                                                                       |     |     |         |    |
|---------------------------------|-------|---------------------------------------------------------------------------------------|-----|-----|---------|----|
|                                 | Water | 384                                                                                   | 506 | 122 | 0.028   |    |
|                                 | Solid |                                                                                       | 520 |     | 0.15    | 90 |
| <b>3-NO<sub>2</sub>-Cy</b>      | MeCN  | 346(6.60×10 <sup>3</sup> ); 436(1.17×10 <sup>4</sup> )                                | 502 |     | 0.00092 |    |
|                                 | Solid |                                                                                       | 565 |     | 0.051   |    |
| <b>3-NO<sub>2</sub>-(R,R)Cy</b> | MeCN  | 346(6.40×10 <sup>3</sup> ); 436(1.12×10 <sup>4</sup> )                                | 502 |     | 0.00087 |    |
|                                 | Solid |                                                                                       | 565 |     | 0.049   |    |
| <b>3-NO<sub>2</sub>-(S,S)Cy</b> | MeCN  | 346(6.20×10 <sup>3</sup> ); 436(1.09×10 <sup>4</sup> )                                | 502 |     | 0.0010  |    |
|                                 | Solid |                                                                                       | 565 |     | 0.053   |    |
| <b>3-OMe-Cy</b>                 | MeCN  | 259(2.59×10 <sup>4</sup> ); 332(5.70×10 <sup>3</sup> )                                | 458 |     | 0.0053  |    |
|                                 | Solid |                                                                                       | 523 |     | 0.0085  |    |
| <b>3-<i>t</i>-Bu-Cy</b>         | MeCN  | 258(2.46×10 <sup>4</sup> ); 323(1.11×10 <sup>4</sup> )                                | 457 |     | 0.00099 |    |
|                                 | Solid |                                                                                       | 495 |     | 0.0012  |    |
| <b>4-NEt<sub>2</sub>-Cy</b>     | MeCN  | 323(5.97×10 <sup>4</sup> )                                                            | 458 |     | 0.00056 |    |
|                                 | Solid |                                                                                       | 519 |     | 0.038   |    |
| <b>5-OMe-Cy</b>                 | MeCN  | 255(1.53×10 <sup>4</sup> ); 345(9.30×10 <sup>3</sup> )                                | 457 |     | 0.0023  |    |
|                                 | Water | 257; 359                                                                              | 510 | 151 | 0.0037  | 80 |
|                                 | Solid |                                                                                       | 548 |     | 0.026   |    |
| <b>5-NO<sub>2</sub>-Cy</b>      | MeCN  | 323(1.75×10 <sup>4</sup> ); 403(1.24×10 <sup>4</sup> )                                | 482 |     | 0.0013  |    |
|                                 | Water | 325; 401                                                                              | 516 | 115 | 0.0015  | 90 |
|                                 | Solid |                                                                                       | 502 |     | 0.14    |    |
| <b>Naph-Cy</b>                  | MeCN  | 307(1.93×10 <sup>4</sup> ); 401(1.07×10 <sup>4</sup> );<br>422(1.06×10 <sup>4</sup> ) | 457 |     | 0.00018 |    |
|                                 | Solid |                                                                                       | 486 |     | 0.0053  |    |
| <b>3,5-Cl-Cy</b>                | MeCN  | 257(1.97×10 <sup>4</sup> ); 336(7.40×10 <sup>3</sup> )                                | 486 |     | 0.010   |    |
|                                 | Water | 394                                                                                   | 511 | 117 | 0.064   | 90 |
|                                 | Solid |                                                                                       | 532 |     | 0.32    |    |
| <b>3,5-Cl-(R,R)Cy</b>           | MeCN  | 254(2.18×10 <sup>4</sup> ); 336(7.80×10 <sup>3</sup> )                                | 486 |     | 0.011   |    |
|                                 | Water | 395                                                                                   | 511 | 116 | 0.066   | 90 |

|                                   |       |                                                        |     |     |         |    |
|-----------------------------------|-------|--------------------------------------------------------|-----|-----|---------|----|
|                                   | Solid |                                                        | 532 |     | 0.33    |    |
| <b>3,5-Cl-(S,S)Cy</b>             | MeCN  | 257(1.84×10 <sup>4</sup> ); 336(6.70×10 <sup>3</sup> ) | 486 |     | 0.010   |    |
|                                   | Water | 394                                                    | 511 | 117 | 0.068   | 90 |
|                                   | Solid |                                                        | 532 |     | 0.35    |    |
| <b>3,5-NO<sub>2</sub>-Cy</b>      | MeCN  | 396(3.39×10 <sup>4</sup> )                             | 487 |     | 0.00039 |    |
|                                   | Solid |                                                        | 550 |     | 0.0016  |    |
| <b>3,5-NO<sub>2</sub>-(R,R)Cy</b> | MeCN  | 396(3.60×10 <sup>4</sup> )                             | 487 |     | 0.00043 |    |
|                                   | Solid |                                                        | 549 |     | 0.0016  |    |
| <b>3,5-NO<sub>2</sub>-(S,S)Cy</b> | MeCN  | 396(3.63×10 <sup>4</sup> )                             | 487 |     | 0.00040 |    |
|                                   | Solid |                                                        | 550 |     | 0.0019  |    |

---

**Table. S2** Photophysical data of **diPhs**. Sample without emission data mean that it is non-emissive.

|                       | medium | $\lambda_{\text{abs}}/\text{nm}$ ( $\epsilon/\text{dm}^3 \text{ mol}^{-1} \text{ cm}^{-1}$ ) | $\lambda_{\text{em}}/\text{nm}$ | Stokes shift /nm | $\Phi$  | $f/\%$ |
|-----------------------|--------|----------------------------------------------------------------------------------------------|---------------------------------|------------------|---------|--------|
| <b>diPh</b>           | MeCN   | 255( $4.06 \times 10^4$ ); 318( $1.29 \times 10^4$ )                                         | 433                             |                  | 0.00035 |        |
|                       | Water  | 256; 318                                                                                     | 437                             | 119              | 0.0058  | 60     |
|                       | Solid  |                                                                                              | 507                             |                  | 0.10    |        |
| <b>(R,R)diPh</b>      | MeCN   | 257( $3.44 \times 10^4$ ); 316( $1.17 \times 10^4$ )                                         | 433                             |                  | 0.00032 |        |
|                       | Water  | 257; 316                                                                                     | 437                             | 121              | 0.0056  | 60     |
|                       | Solid  |                                                                                              | 507                             |                  | 0.12    |        |
| <b>(S,S)diPh</b>      | MeCN   | 256( $3.61 \times 10^4$ ); 318( $1.03 \times 10^4$ )                                         | 432                             |                  | 0.00027 |        |
|                       | Water  | 257; 318                                                                                     | 436                             | 118              | 0.0058  | 70     |
|                       | Solid  |                                                                                              | 506                             |                  | 0.098   |        |
| <b>3-F-diPh</b>       | MeCN   | 255( $4.10 \times 10^4$ ); 318( $8.16 \times 10^3$ )                                         | 434                             |                  | 0.00059 |        |
|                       | Water  | 255; 318                                                                                     | 504                             | 186              | 0.0089  | 60     |
|                       | Solid  |                                                                                              | 512                             |                  | 0.12    |        |
| <b>3-F-(R,R)diPh</b>  | MeCN   | 254( $4.59 \times 10^4$ ); 319( $7.76 \times 10^3$ )                                         | 434                             |                  | 0.00072 |        |
|                       | Water  | 254; 318                                                                                     | 504                             | 186              | 0.0088  | 70     |
|                       | Solid  |                                                                                              | 511                             |                  | 0.12    |        |
| <b>3-F-(S,S)diPh</b>  | MeCN   | 254( $4.10 \times 10^4$ ); 319( $6.84 \times 10^3$ )                                         | 432                             |                  | 0.00051 |        |
|                       | Water  | 254; 319                                                                                     | 504                             | 185              | 0.0096  | 60     |
|                       | Solid  |                                                                                              | 512                             |                  | 0.14    |        |
| <b>3-Cl-diPh</b>      | MeCN   | 257( $3.71 \times 10^4$ ); 323( $9.11 \times 10^3$ )                                         | 447                             |                  | 0.00094 |        |
|                       | Water  | 258; 323                                                                                     | 506                             | 183              | 0.0113  | 70     |
|                       | Solid  |                                                                                              | 524                             |                  | 0.16    |        |
| <b>3-Cl-(R,R)diPh</b> | MeCN   | 257( $3.77 \times 10^4$ ); 323( $9.24 \times 10^3$ )                                         | 446                             |                  | 0.0011  |        |
|                       | Water  | 258; 323                                                                                     | 506                             | 183              | 0.011   | 60     |
|                       | Solid  |                                                                                              | 524                             |                  | 0.16    |        |
| <b>3-Cl-(S,S)diPh</b> | MeCN   | 258( $3.73 \times 10^4$ ); 325( $9.00 \times 10^3$ )                                         | 447                             |                  | 0.00081 |        |

|                                |       |                                                                                                                   |             |     |          |    |
|--------------------------------|-------|-------------------------------------------------------------------------------------------------------------------|-------------|-----|----------|----|
|                                | Water | 259; 323                                                                                                          | 506         | 181 | 0.013    | 70 |
|                                | Solid |                                                                                                                   | 522         |     | 0.18     |    |
| <b>3-NO<sub>2</sub>-diPh</b>   | MeCN  | 348(1.22×10 <sup>4</sup> ); 434(6.20×10 <sup>3</sup> )                                                            | 503         |     | <0.00010 |    |
|                                | Water | 429                                                                                                               | 511         | 182 | 0.00011  | 95 |
|                                | Solid |                                                                                                                   | 522         |     | 0.020    |    |
| <b>4-NEt<sub>2</sub>-diPh</b>  | MeCN  | 331(6.23×10 <sup>4</sup> )                                                                                        | 432         |     | 0.00018  |    |
|                                | Solid |                                                                                                                   | 492         |     | 0.032    |    |
| <b>5-NO<sub>2</sub>-diPh</b>   | MeCN  | 318(2.31×10 <sup>4</sup> ); 391(1.18×10 <sup>3</sup> )                                                            | 457         |     | 0.00022  |    |
|                                | Solid |                                                                                                                   | 500;<br>555 |     | 0.074    |    |
| <b>Naph-diPh</b>               | MeCN  | 312(6.35×10 <sup>4</sup> ); 359(3.60×10 <sup>4</sup> );<br>402(2.05×10 <sup>4</sup> ); 423(1.86×10 <sup>4</sup> ) | 454         |     | 0.00021  |    |
|                                | Solid |                                                                                                                   | 474         |     | 0.021    |    |
| <b>3,5-Cl-diPh</b>             | MeCN  | 258(3.30×10 <sup>4</sup> ); 335(9.21×10 <sup>3</sup> )                                                            | 490         |     | 0.0016   |    |
|                                | Water | 258; 335                                                                                                          | 508         | 173 | 0.072    | 40 |
|                                | Solid |                                                                                                                   | 534         |     | 0.20     |    |
| <b>3,5-Cl-(R,R)diPh</b>        | MeCN  | 257(3.33×10 <sup>4</sup> ); 335(9.08×10 <sup>3</sup> )                                                            | 487         |     | 0.0016   |    |
|                                | Water | 258; 335                                                                                                          | 509         | 174 | 0.070    | 40 |
|                                | Solid |                                                                                                                   | 534         |     | 0.20     |    |
| <b>3,5-Cl-(S,S)diPh</b>        | MeCN  | 259(3.26×10 <sup>4</sup> ); 335(9.24×10 <sup>3</sup> )                                                            | 491         |     | 0.0018   |    |
|                                | Water | 259; 335                                                                                                          | 508         | 173 | 0.075    | 30 |
|                                | Solid |                                                                                                                   | 536         |     | 0.22     |    |
| <b>3,5-NO<sub>2</sub>-diPh</b> | MeCN  | 369(2.15×10 <sup>4</sup> )                                                                                        | 430         |     | <0.00010 |    |
|                                | Solid |                                                                                                                   | 556         |     | 0.012    |    |

---



**Table. S3** Photophysical data of anion probes. The amount of X<sup>-</sup> is 100 equivalent to Salen ligands. Solvent is DMSO. Sample without emission data means that it is non-emissive.

| diPhs+X <sup>-</sup>                                  | $\lambda_{\text{abs}}/\text{nm}(\epsilon/\text{dm}^3 \text{ mol}^{-1} \text{ cm}^{-1})$ | $\lambda_{\text{em}}/\text{nm}$ | $\Phi$ | I/I <sub>0</sub> |
|-------------------------------------------------------|-----------------------------------------------------------------------------------------|---------------------------------|--------|------------------|
| <b>Cy</b>                                             | 318(5.50×10 <sup>3</sup> ); 415(1.80×10 <sup>3</sup> )                                  | 440                             | 0.0043 |                  |
| <b>Cy+F<sup>-</sup></b>                               | 316(1.71×10 <sup>4</sup> ); 390(8.80×10 <sup>3</sup> )                                  | 454                             | 0.077  | 199              |
| <b>Cy+PO<sub>4</sub><sup>3-</sup></b>                 | 391(3.40×10 <sup>3</sup> )                                                              | 457                             | 0.077  | 177              |
| <b>Cy+OH<sup>-</sup></b>                              | 262(2.18×10 <sup>4</sup> ); 370(1.41×10 <sup>4</sup> )                                  | 456                             | 0.088  | 199              |
| <b>Cy+CO<sub>3</sub><sup>2-</sup></b>                 | 271(2.40×10 <sup>4</sup> ); 373(1.23×10 <sup>4</sup> )                                  | 467                             | 0.065  | 132              |
| <b>Cy+SO<sub>4</sub><sup>2-</sup></b>                 | 262(1.67×10 <sup>4</sup> ); 357(5.30×10 <sup>3</sup> )                                  | 439                             | 0.053  | 89.2             |
| <b>3-F-Cy</b>                                         | 318(5.50×10 <sup>3</sup> ); 415(1.70×10 <sup>3</sup> )                                  | 467                             | 0.0073 |                  |
| <b>3-F-Cy+F<sup>-</sup></b>                           | 262(4.40×10 <sup>4</sup> ); 390(3.26×10 <sup>4</sup> )                                  | 475                             | 0.25   | 1087             |
| <b>3-F-Cy+P<sub>2</sub>O<sub>7</sub><sup>4-</sup></b> | 260(1.26×10 <sup>4</sup> ); 389(1.82×10 <sup>4</sup> )                                  | 469                             | 0.14   | 686              |
| <b>3-F-Cy+PO<sub>4</sub><sup>3-</sup></b>             | 258(8.45×10 <sup>4</sup> ); 387(1.14×10 <sup>4</sup> )                                  | 449                             | 0.24   | 1219             |
| <b>3-F-Cy+OH<sup>-</sup></b>                          | 262(6.32×10 <sup>4</sup> ); 376(2.22×10 <sup>4</sup> )                                  | 442                             | 0.27   | 1535             |
| <b>3-F-Cy+CO<sub>3</sub><sup>2-</sup></b>             | 271(3.97×10 <sup>4</sup> ); 378(1.46×10 <sup>4</sup> )                                  | 464                             | 0.083  | 397              |
| <b>3-F-Cy+S<sup>2-</sup></b>                          | 268(3.02×10 <sup>5</sup> )                                                              | 444                             | 0.23   | 1287             |
| <b>3-Cl-Cy</b>                                        | 260(5.22×10 <sup>3</sup> ); 421(3.90×10 <sup>3</sup> )                                  | 458                             | 0.0080 |                  |
| <b>3-Cl-Cy+F<sup>-</sup></b>                          | 264(7.24×10 <sup>4</sup> ); 394(2.20×10 <sup>4</sup> )                                  | 448                             | 0.14   | 68.6             |
| <b>3-Cl-Cy+PO<sub>4</sub><sup>3-</sup></b>            | 258(9.49×10 <sup>4</sup> ); 395(1.75×10 <sup>4</sup> )                                  | 449                             | 0.13   | 48.6             |
| <b>3-Cl-Cy+OH<sup>-</sup></b>                         | 264(5.83×10 <sup>4</sup> ); 386(2.08×10 <sup>4</sup> )                                  | 447                             | 0.13   | 67.6             |
| <b>3-Cl-Cy+CO<sub>3</sub><sup>2-</sup></b>            | 264(6.68×10 <sup>4</sup> ); 395(2.42×10 <sup>4</sup> )                                  | 458                             | 0.044  | 33.3             |
| <b>3-Cl-Cy+S<sup>2-</sup></b>                         | 265(3.42×10 <sup>5</sup> )                                                              | 450                             | 0.099  | 61.8             |
| <b>3,5-Cl-Cy</b>                                      | 263(5.24×10 <sup>4</sup> ); 425(7.20×10 <sup>3</sup> )                                  | 482                             | 0.011  |                  |

|                                                          |                                                        |     |        |      |
|----------------------------------------------------------|--------------------------------------------------------|-----|--------|------|
| <b>3,5-Cl-Cy+F<sup>-</sup></b>                           | 262(7.55×10 <sup>4</sup> ); 403(2.31×10 <sup>4</sup> ) | 456 | 0.15   | 27.8 |
| <b>3,5-Cl-Cy+PO<sub>4</sub><sup>3-</sup></b>             | 262(6.98×10 <sup>4</sup> ); 407(1.93×10 <sup>4</sup> ) | 459 | 0.18   | 26.3 |
| <b>3,5-Cl-Cy+OH<sup>-</sup></b>                          | 259(8.42×10 <sup>4</sup> ); 399(2.07×10 <sup>4</sup> ) | 456 | 0.16   | 28.6 |
| <b>3,5-Cl-Cy+CO<sub>3</sub><sup>2-</sup></b>             | 272(6.15×10 <sup>4</sup> ); 404(2.57×10 <sup>4</sup> ) | 460 | 0.12   | 23.2 |
| <b>3,5-Cl-Cy+S<sup>2-</sup></b>                          | 274(2.49×10 <sup>5</sup> )                             | 458 | 0.14   | 30.7 |
| <b>diPh</b>                                              | 260(4.12×10 <sup>3</sup> ); 408(1.20×10 <sup>3</sup> ) | 430 | 0.0014 |      |
| <b>diPh+F<sup>-</sup></b>                                | 264(3.71×10 <sup>4</sup> ); 376(1.82×10 <sup>4</sup> ) | 475 | 0.0025 | 36.2 |
| <b>diPh+OH<sup>-</sup></b>                               | 261(3.95×10 <sup>4</sup> ); 364(1.23×10 <sup>4</sup> ) | 462 | 0.026  | 163  |
| <b>diPh+CO<sub>3</sub><sup>2-</sup></b>                  | 264(5.21×10 <sup>4</sup> ); 365(1.85×10 <sup>4</sup> ) | 470 | 0.0056 | 33.6 |
| <b>diPh+PO<sub>4</sub><sup>3-</sup></b>                  | 266(3.83×10 <sup>4</sup> ); 379(1.76×10 <sup>4</sup> ) | 450 | 0.014  | 96.7 |
| <b>diPh+S<sup>2-</sup></b>                               | 273(2.78×10 <sup>5</sup> )                             | 455 | 0.0096 | 72.2 |
| <b>3-F-diPh</b>                                          | 260(5.22×10 <sup>3</sup> ); 420(1.00×10 <sup>3</sup> ) | 430 | 0.0072 |      |
| <b>3-F-diPh+F<sup>-</sup></b>                            | 265(4.69×10 <sup>4</sup> ); 385(2.62×10 <sup>4</sup> ) | 451 | 0.19   | 1676 |
| <b>3-F-diPh+OH<sup>-</sup></b>                           | 260(4.36×10 <sup>4</sup> ); 372(1.45×10 <sup>4</sup> ) | 452 | 0.23   | 1077 |
| <b>3-F-diPh+CO<sub>3</sub><sup>2-</sup></b>              | 264(5.53×10 <sup>4</sup> ); 372(2.04×10 <sup>4</sup> ) | 460 | 0.075  | 450  |
| <b>3-F-diPh+PO<sub>4</sub><sup>3-</sup></b>              | 266(4.24×10 <sup>4</sup> ); 385(1.97×10 <sup>4</sup> ) | 452 | 0.24   | 1733 |
| <b>3-F-diPh+S<sup>2-</sup></b>                           | 270(3.54×10 <sup>5</sup> )                             | 451 | 0.082  | 612  |
| <b>3-Cl-diPh</b>                                         | 318(5.50×10 <sup>3</sup> ); 415(1.70×10 <sup>3</sup> ) | 450 | 0.021  |      |
| <b>3-Cl-diPh+F<sup>-</sup></b>                           | 265(5.03×10 <sup>4</sup> ); 392(3.41×10 <sup>4</sup> ) | 456 | 0.20   | 421  |
| <b>3-Cl-diPh+P<sub>2</sub>O<sub>7</sub><sup>4-</sup></b> | 259(4.74×10 <sup>4</sup> ); 390(9.70×10 <sup>3</sup> ) | 442 | 0.25   | 424  |
| <b>3-Cl-diPh+OH<sup>-</sup></b>                          | 260(4.58×10 <sup>4</sup> ); 378(1.66×10 <sup>4</sup> ) | 453 | 0.16   | 283  |
| <b>3-Cl-diPh+CO<sub>3</sub><sup>2-</sup></b>             | 264(5.46×10 <sup>4</sup> ); 379(2.32×10 <sup>4</sup> ) | 466 | 0.099  | 156  |
| <b>3-Cl-diPh+PO<sub>4</sub><sup>3-</sup></b>             | 265(4.66×10 <sup>4</sup> ); 393(2.12×10 <sup>4</sup> ) | 459 | 0.22   | 366  |

|                                                |                                                                                  |          |       |      |
|------------------------------------------------|----------------------------------------------------------------------------------|----------|-------|------|
| <b>3,5-Cl-diPh</b>                             | 264( $2.31 \times 10^4$ ); 336 ( $6.90 \times 10^3$ ); 433( $3.20 \times 10^3$ ) | 485      | 0.064 |      |
| <b>3,5-Cl-diPh+F<sup>-</sup></b>               | 264( $5.23 \times 10^4$ ); 402( $3.14 \times 10^4$ )                             | 416; 466 | 0.24  | 41.1 |
| <b>3,5-Cl-diPh+OH<sup>-</sup></b>              | 260( $4.85 \times 10^4$ ); 389( $1.87 \times 10^4$ )                             | 411; 458 | 0.29  | 36.4 |
| <b>3,5-Cl-diPh+CO<sub>3</sub><sup>2-</sup></b> | 264( $5.88 \times 10^4$ ); 388( $3.12 \times 10^4$ )                             | 477      | 0.23  | 27.6 |
| <b>3,5-Cl-diPh+PO<sub>4</sub><sup>3-</sup></b> | 265( $5.02 \times 10^4$ ); 404( $2.43 \times 10^4$ )                             | 416; 457 | 0.28  | 29.4 |
| <b>3,5-Cl-diPh+S<sup>2-</sup></b>              | 288( $3.67 \times 10^5$ )                                                        | 464      | 0.22  | 36.9 |

---

**Table. S4** Photophysical data of C<sub>2</sub>, Cy and diPh DMSO solution upon the addition of 100 equivalent of different L-amino acids. Sample without emission data means that it is non-emissive. I<sub>0</sub> and I represents the fluorescence emission intensity of receptor in the absence and presence of L-amino acid, respectively.

| Dyes+amino acid       | $\lambda_{\text{abs}}/\text{nm}(\epsilon/\text{dm}^3 \text{ mol}^{-1}\text{cm}^{-1})$ | $\lambda_{\text{em}}/\text{nm}$ | $\Phi$ | I/I <sub>0</sub> |
|-----------------------|---------------------------------------------------------------------------------------|---------------------------------|--------|------------------|
| C <sub>2</sub>        | 263(2.43×10 <sup>4</sup> ); 320(8.00×10 <sup>3</sup> )                                | 432                             | 0.0068 |                  |
| C <sub>2</sub> +L-Ala | 261(1.11×10 <sup>4</sup> ); 319(7.50×10 <sup>3</sup> ); 411(4.40×10 <sup>3</sup> )    | 434                             | 0.025  | 27.8             |
| C <sub>2</sub> +L-Pro | 261(1.24×10 <sup>4</sup> ); 323(5.40×10 <sup>3</sup> ); 409(7.10×10 <sup>3</sup> )    | 430                             | 0.0071 | 1.56             |
| C <sub>2</sub> +L-Glu | 263(7.10×10 <sup>3</sup> ); 322(7.30×10 <sup>3</sup> )                                | 441                             | 0.048  | 12.5             |
| C <sub>2</sub> +L-Gln | 264(9.90×10 <sup>3</sup> ); 319(7.40×10 <sup>3</sup> ); 410(3.00×10 <sup>3</sup> )    | 430                             | 0.042  | 31.5             |
| C <sub>2</sub> +L-Val | 265(1.03×10 <sup>4</sup> ); 321(5.80×10 <sup>3</sup> )                                | 432                             | 0.0075 | 2.15             |
| C <sub>2</sub> +L-Arg | 324(6.00×10 <sup>3</sup> )                                                            | 431                             | 0.0092 | 5.15             |
| C <sub>2</sub> +L-Leu | 264(1.36×10 <sup>4</sup> ); 316(8.40×10 <sup>3</sup> ); 410(5.00×10 <sup>3</sup> )    | 429                             | 0.032  | 39.9             |
| C <sub>2</sub> +L-Trp | 258(>1.00×10 <sup>6</sup> ); 410(2.20×10 <sup>3</sup> )                               | 432                             | 0.034  | 26.0             |
| C <sub>2</sub> +L-Ser | 267(8.3×10 <sup>3</sup> ); 318(7.20×10 <sup>3</sup> ); 410(1.90×10 <sup>3</sup> )     | 433                             | 0.048  | 26.5             |
| C <sub>2</sub> +L-His | 268(2.80×10 <sup>3</sup> ); 320(4.80×10 <sup>3</sup> )                                | 432                             | 0.028  | 13.9             |
| Cy                    | 318(5.50×10 <sup>3</sup> ); 415(5.80×10 <sup>3</sup> )                                | 440                             | 0.0011 |                  |
| Cy+L-Ala              | 267(3.42×10 <sup>4</sup> ); 424(5.80×10 <sup>3</sup> )                                | 438                             | 0.0088 | 13.4             |
| Cy+L-Pro              | 271(3.47×10 <sup>4</sup> ); 424(6.10×10 <sup>3</sup> )                                | 489                             | 0.0048 | 15.3             |
| Cy+L-Glu              | 272(3.42×10 <sup>4</sup> ); 428(2.00×10 <sup>3</sup> )                                | 442                             | 0.014  | 21.6             |
| Cy+L-Gln              | 266(3.76×10 <sup>3</sup> ); 423(6.20×10 <sup>3</sup> )                                | 439                             | 0.0068 | 19.4             |
| Cy+L-Val              | 267(3.58×10 <sup>4</sup> ); 419(5.70×10 <sup>3</sup> )                                | 433                             | 0.012  | 22.7             |
| Cy+L-Arg              | 265(4.21×10 <sup>4</sup> ); 402(6.70×10 <sup>3</sup> )                                | 445                             | 0.013  | 27.1             |
| Cy+L-Leu              | 266(3.43×10 <sup>4</sup> ); 424(4.30×10 <sup>3</sup> )                                | 438                             | 0.01   | 17.6             |
| Cy+L-Trp              | 297(>1.00×10 <sup>6</sup> ); 380(7.30×10 <sup>3</sup> )                               | 433                             | 0.0075 | 16.7             |
| Cy+L-Ser              | 269(3.38×10 <sup>4</sup> ); 426(4.60×10 <sup>3</sup> )                                | 447                             | 0.0078 | 32.5             |

|                    |                                                         |     |        |      |
|--------------------|---------------------------------------------------------|-----|--------|------|
| Cy+L-His           | 266(3.32×10 <sup>3</sup> ); 424(3.60×10 <sup>3</sup> )  | 433 | 0.0088 | 16.8 |
| <b>diPh</b>        | 260(4.12×10 <sup>3</sup> ); 408(1.20×10 <sup>3</sup> )  | 430 | 0.0014 |      |
| <b>diPh</b> +L-Ala | 260(3.79×10 <sup>4</sup> )                              | 431 | 0.0068 | 24.8 |
| <b>diPh</b> +L-Pro | 271(3.54×10 <sup>4</sup> )                              | 435 | 0.0013 | 1.11 |
| <b>diPh</b> +L-Glu | 268(3.72×10 <sup>4</sup> )                              | 449 | 0.0057 | 20.7 |
| <b>diPh</b> +L-Gln | 266(3.69×10 <sup>4</sup> )                              | 428 | 0.0060 | 21.9 |
| <b>diPh</b> +L-Val | 265(4.01×10 <sup>4</sup> ); 397(1.30×10 <sup>3</sup> )  | 433 | 0.0054 | 19.7 |
| <b>diPh</b> +L-Arg | 266(3.68×10 <sup>4</sup> ); 373(1.40×10 <sup>3</sup> )  | 430 | 0.045  | 116  |
| <b>diPh</b> +L-Leu | 266(3.21×10 <sup>4</sup> )                              | 429 | 0.0065 | 23.4 |
| <b>diPh</b> +L-Trp | 288(>1.00×10 <sup>6</sup> ); 297(2.72×10 <sup>5</sup> ) | 431 | 0.016  | 56.1 |
| <b>diPh</b> +L-Ser | 266(4.11×10 <sup>4</sup> )                              | 426 | 0.0015 | 0.97 |
| <b>diPh</b> +L-His | 266(4.53×10 <sup>4</sup> )                              | 428 | 0.0012 | 1.03 |

---

**Table. S5** Photophysical data of **3-F-(R,R)Cy** and **3-F-(S,S)Cy** DMSO solution upon the addition of 100 equivalent of different D- or L-amino acids. Sample without emission data means that it is non-emissive.  $ef = (I_D - I_0)/(I_L - I_0)$ .

| <b>3-F-Cy+amino acid</b> | $\lambda_{\text{abs}}/\text{nm}(\epsilon/\text{dm}^3 \text{ mol}^{-1} \text{ cm}^{-1})$ | $\lambda_{\text{em}}/\text{nm}$ | $\Phi$ | $I/I_0$ | $ef$ |
|--------------------------|-----------------------------------------------------------------------------------------|---------------------------------|--------|---------|------|
| <b>3-F-(R,R)Cy</b>       | 318( $5.50 \times 10^3$ ); 415( $1.70 \times 10^3$ )                                    | 457                             | 0.0061 |         |      |
| <b>3-F-(R,R)Cy+L-Ala</b> | 282( $9.40 \times 10^3$ ); 409( $6.50 \times 10^3$ )                                    | 462                             | 0.031  | 70.5    | 0.94 |
| <b>3-F-(R,R)Cy+D-Ala</b> | 281( $9.40 \times 10^3$ ); 409( $6.40 \times 10^3$ )                                    | 462                             | 0.047  | 66.3    |      |
| <b>3-F-(R,R)Cy+L-Pro</b> | 264( $1.07 \times 10^4$ ); 324( $5.40 \times 10^3$ ); 409( $2.60 \times 10^3$ )         | 478                             | 0.11   | 104     | 0.89 |
| <b>3-F-(R,R)Cy+D-Pro</b> | 264( $1.48 \times 10^4$ ); 322( $5.10 \times 10^3$ ); 409( $2.00 \times 10^3$ )         | 479                             | 0.12   | 92.6    |      |
| <b>3-F-(R,R)Cy+L-Glu</b> | 265( $1.63 \times 10^4$ ); 322( $5.50 \times 10^3$ ); 409( $3.40 \times 10^3$ )         | 433                             | 0.043  | 48.0    | 1.17 |
| <b>3-F-(R,R)Cy+D-Glu</b> | 264( $1.92 \times 10^4$ ); 321( $5.50 \times 10^3$ ); 409( $3.20 \times 10^3$ )         | 435                             | 0.049  | 56.2    |      |
| <b>3-F-(R,R)Cy+L-Gln</b> | 276( $1.24 \times 10^4$ ); 409( $9.80 \times 10^3$ )                                    | 429                             | 0.038  | 84.1    | 1.58 |
| <b>3-F-(R,R)Cy+D-Gln</b> | 279( $1.68 \times 10^4$ ); 413( $1.07 \times 10^4$ )                                    | 430                             | 0.050  | 132     |      |
| <b>3-F-(R,R)Cy+L-Val</b> | 284( $1.33 \times 10^4$ ); 410( $8.40 \times 10^3$ )                                    | 434                             | 0.035  | 85.1    | 0.66 |
| <b>3-F-(R,R)Cy+D-Val</b> | 279( $1.19 \times 10^4$ ); 408( $8.40 \times 10^3$ )                                    | 431                             | 0.024  | 56.2    |      |
| <b>3-F-(R,R)Cy+L-Arg</b> | 278( $1.98 \times 10^4$ ); 406( $1.13 \times 10^4$ )                                    | 439                             | 0.14   | 407     | 1.07 |
| <b>3-F-(R,R)Cy+D-Arg</b> | 278( $1.58 \times 10^4$ ); 409( $1.04 \times 10^4$ )                                    | 454                             | 0.16   | 436     |      |
| <b>3-F-(R,R)Cy+L-Leu</b> | 278( $1.62 \times 10^4$ ); 412( $1.06 \times 10^4$ )                                    | 436                             | 0.038  | 102     | 1.29 |
| <b>3-F-(R,R)Cy+D-Leu</b> | 279( $1.19 \times 10^4$ ); 414( $8.20 \times 10^3$ )                                    | 427                             | 0.055  | 131     |      |
| <b>3-F-(R,R)Cy+L-Trp</b> | 286( $>1.00 \times 10^6$ )                                                              | 430                             | 0.037  | 83.6    | 1.19 |
| <b>3-F-(R,R)Cy+D-Trp</b> | 283( $>1.00 \times 10^6$ )                                                              | 432                             | 0.038  | 99.5    |      |
| <b>3-F-(R,R)Cy+L-Ser</b> | 278( $1.14 \times 10^4$ ); 412( $7.70 \times 10^3$ )                                    | 447                             | 0.039  | 72.9    | 1.27 |
| <b>3-F-(R,R)Cy+D-Ser</b> | 279( $1.28 \times 10^4$ ); 413( $9.30 \times 10^3$ )                                    | 437                             | 0.036  | 92.6    |      |
| <b>3-F-(R,R)Cy+L-His</b> | 278( $1.19 \times 10^4$ ); 412( $8.20 \times 10^3$ )                                    | 437                             | 0.062  | 124     | 1.06 |
| <b>3-F-(R,R)Cy+D-His</b> | 279( $1.45 \times 10^4$ ); 410( $1.10 \times 10^4$ )                                    | 436                             | 0.048  | 132     |      |
| <b>3-F-(S,S)Cy</b>       | 318( $5.60 \times 10^3$ ); 415( $1.90 \times 10^3$ )                                    | 456                             | 0.0067 |         |      |

|                          |                                                                                     |     |       |      |      |
|--------------------------|-------------------------------------------------------------------------------------|-----|-------|------|------|
| <b>3-F-(S,S)Cy+L-Ala</b> | 281(1.51×10 <sup>4</sup> ); 409(1.24×10 <sup>4</sup> )                              | 461 | 0.039 | 62.8 | 1.45 |
| <b>3-F-(S,S)Cy+D-Ala</b> | 281(1.27×10 <sup>4</sup> ); 408(1.08×10 <sup>4</sup> )                              | 462 | 0.061 | 90.4 |      |
| <b>3-F-(S,S)Cy+L-Pro</b> | 264(1.21×10 <sup>4</sup> ); 324(5.20×10 <sup>3</sup> ); 409(2.50×10 <sup>3</sup> )  | 475 | 0.20  | 113  | 0.83 |
| <b>3-F-(S,S)Cy+D-Pro</b> | 264(1.05×10 <sup>4</sup> ); 319(4.50×10 <sup>3</sup> ); 409(2.90×10 <sup>3</sup> )  | 476 | 0.16  | 94.0 |      |
| <b>3-F-(S,S)Cy+L-Glu</b> | 266(1.11×10 <sup>4</sup> ); 321(5.20×10 <sup>3</sup> ); 411(3.80×10 <sup>3</sup> )  | 437 | 0.033 | 21.0 | 0.67 |
| <b>3-F-(S,S)Cy+D-Glu</b> | 265(9.70×10 <sup>3</sup> ); 319(4.70×10 <sup>3</sup> ); 413 (3.10×10 <sup>3</sup> ) | 436 | 0.023 | 14.3 |      |
| <b>3-F-(S,S)Cy+L-Gln</b> | 281(1.30×10 <sup>4</sup> ); 412(1.02×10 <sup>4</sup> )                              | 431 | 0.052 | 104  | 1.14 |
| <b>3-F-(S,S)Cy+D-Gln</b> | 279(1.09×10 <sup>4</sup> ); 413(8.20×10 <sup>3</sup> )                              | 429 | 0.080 | 119  |      |
| <b>3-F-(S,S)Cy+L-Val</b> | 284(1.33×10 <sup>4</sup> ); 412(1.02×10 <sup>4</sup> )                              | 435 | 0.016 | 26.7 | 1.48 |
| <b>3-F-(S,S)Cy+D-Val</b> | 276(1.03×10 <sup>4</sup> ); 411(7.60×10 <sup>3</sup> )                              | 431 | 0.028 | 39.1 |      |
| <b>3-F-(S,S)Cy+L-Arg</b> | 276(6.42×10 <sup>4</sup> ); 407(3.31×10 <sup>4</sup> )                              | 470 | 0.018 | 86.8 | 1.09 |
| <b>3-F-(S,S)Cy+D-Arg</b> | 279(5.95×10 <sup>4</sup> ); 409(3.18×10 <sup>4</sup> )                              | 464 | 0.015 | 94.6 |      |
| <b>3-F-(S,S)Cy+L-Leu</b> | 270(1.33×10 <sup>4</sup> ); 412(3.20×10 <sup>3</sup> )                              | 428 | 0.17  | 65.1 | 0.44 |
| <b>3-F-(S,S)Cy+D-Leu</b> | 279(1.18×10 <sup>4</sup> ); 411(9.60×10 <sup>3</sup> )                              | 430 | 0.060 | 29.3 |      |
| <b>3-F-(S,S)Cy+L-Trp</b> | 290(>1.00×10 <sup>6</sup> )                                                         | 431 | 0.021 | 21.6 | 1.59 |
| <b>3-F-(S,S)Cy+D-Trp</b> | 291(>1.00×10 <sup>6</sup> )                                                         | 437 | 0.040 | 33.7 |      |
| <b>3-F-(S,S)Cy+L-Ser</b> | 277(1.02×10 <sup>4</sup> ); 413(7.80×10 <sup>3</sup> )                              | 450 | 0.022 | 27.9 | 0.80 |
| <b>3-F-(S,S)Cy+D-Ser</b> | 277(1.19×10 <sup>4</sup> ); 412(9.20×10 <sup>3</sup> )                              | 437 | 0.015 | 22.6 |      |
| <b>3-F-(S,S)Cy+L-His</b> | 282(1.17×10 <sup>4</sup> ); 411(9.20×10 <sup>3</sup> )                              | 435 | 0.041 | 58.2 | 0.88 |
| <b>3-F-(S,S)Cy+D-His</b> | 281(1.42×10 <sup>4</sup> ); 414(1.10×10 <sup>4</sup> )                              | 427 | 0.031 | 51.2 |      |

---

**Table. S6** Photophysical data of **3-Cl-(R,R)Cy** and **3-Cl-(S,S)Cy** DMSO solution upon the addition of 100 equivalent of different D- or L-amino acids. Sample without emission data means that it is non-emissive.  $ef = (I_D - I_0)/(I_L - I_0)$ .

| <b>3-Cl-Cy+amino acid</b> | $\lambda_{\text{abs}}/\text{nm}(\epsilon/\text{dm}^3 \text{ mol}^{-1} \text{ cm}^{-1})$ | $\lambda_{\text{em}}/\text{nm}$ | $\Phi$ | $I/I_0$ | $ef$ |
|---------------------------|-----------------------------------------------------------------------------------------|---------------------------------|--------|---------|------|
| <b>3-Cl-(R,R)Cy</b>       | 260( $5.22 \times 10^3$ ); 421( $3.90 \times 10^3$ )                                    | 458                             | 0.0076 |         |      |
| <b>3-Cl-(R,R)Cy+L-Ala</b> | 271( $3.57 \times 10^4$ ); 417( $6.90 \times 10^3$ )                                    | 429                             | 0.11   | 19.1    | 0.75 |
| <b>3-Cl-(R,R)Cy+D-Ala</b> | 269( $3.75 \times 10^4$ ); 416( $1.22 \times 10^4$ )                                    | 434                             | 0.051  | 14.5    |      |
| <b>3-Cl-(R,R)Cy+L-Pro</b> | 268( $3.25 \times 10^4$ ); 413( $6.20 \times 10^3$ )                                    | 479                             | 0.13   | 15.7    | 0.95 |
| <b>3-Cl-(R,R)Cy+D-Pro</b> | 265( $3.70 \times 10^4$ ); 411( $6.10 \times 10^3$ )                                    | 475                             | 0.11   | 14.9    |      |
| <b>3-Cl-(R,R)Cy+L-Glu</b> | 267( $1.38 \times 10^4$ ); 324( $7.60 \times 10^3$ ); 413( $7.30 \times 10^3$ )         | 432                             | 0.023  | 6.51    | 0.82 |
| <b>3-Cl-(R,R)Cy+D-Glu</b> | 268( $3.83 \times 10^4$ ); 421( $6.00 \times 10^3$ )                                    | 431                             | 0.035  | 5.54    |      |
| <b>3-Cl-(R,R)Cy+L-Gln</b> | 285( $1.28 \times 10^4$ ); 417( $1.28 \times 10^4$ )                                    | 427                             | 0.081  | 22.7    | 0.54 |
| <b>3-Cl-(R,R)Cy+D-Gln</b> | 276( $3.60 \times 10^4$ ); 414( $1.23 \times 10^4$ )                                    | 432                             | 0.049  | 12.5    |      |
| <b>3-Cl-(R,R)Cy+L-Val</b> | 283( $1.55 \times 10^4$ ); 417( $1.69 \times 10^4$ )                                    | 433                             | 0.015  | 5.15    | 0.97 |
| <b>3-Cl-(R,R)Cy+D-Val</b> | 283( $1.47 \times 10^4$ ); 418( $1.64 \times 10^4$ )                                    | 434                             | 0.015  | 5.05    |      |
| <b>3-Cl-(R,R)Cy+L-Arg</b> | 274( $3.86 \times 10^4$ ); 411( $1.25 \times 10^4$ )                                    | 434                             | 0.091  | 30.4    | 0.89 |
| <b>3-Cl-(R,R)Cy+D-Arg</b> | 275( $3.87 \times 10^4$ ); 417( $1.14 \times 10^4$ )                                    | 437                             | 0.090  | 27.1    |      |
| <b>3-Cl-(R,R)Cy+L-Leu</b> | 277( $3.80 \times 10^4$ ); 417( $1.45 \times 10^4$ )                                    | 434                             | 0.020  | 5.99    | 1.03 |
| <b>3-Cl-(R,R)Cy+D-Leu</b> | 274( $3.72 \times 10^4$ ); 418( $1.33 \times 10^4$ )                                    | 430                             | 0.024  | 6.14    |      |
| <b>3-Cl-(R,R)Cy+L-Trp</b> | 272( $>1.00 \times 10^6$ ); 294( $>1.00 \times 10^6$ )                                  | 424                             | 0.017  | 5.65    | 1.25 |
| <b>3-Cl-(R,R)Cy+D-Trp</b> | 273( $>1.00 \times 10^6$ ); 288( $>1.00 \times 10^6$ )                                  | 423                             | 0.025  | 6.79    |      |
| <b>3-Cl-(R,R)Cy+L-Ser</b> | 280( $4.20 \times 10^4$ ); 418( $1.44 \times 10^4$ )                                    | 435                             | 0.015  | 4.81    | 1.80 |
| <b>3-Cl-(R,R)Cy+D-Ser</b> | 282( $3.96 \times 10^4$ ); 418( $1.56 \times 10^4$ )                                    | 430                             | 0.023  | 7.78    |      |
| <b>3-Cl-(R,R)Cy+L-His</b> | 278( $3.71 \times 10^4$ ); 419( $1.22 \times 10^4$ )                                    | 426                             | 0.035  | 7.99    | 0.87 |
| <b>3-Cl-(R,R)Cy+D-His</b> | 281( $4.16 \times 10^4$ ); 418( $1.61 \times 10^4$ )                                    | 428                             | 0.020  | 7.10    |      |
| <b>3-Cl-(S,S)Cy</b>       | 260( $5.43 \times 10^3$ ); 421( $4.10 \times 10^3$ )                                    | 458                             | 0.0081 |         |      |



|                    |                                                                                    |     |       |      |      |
|--------------------|------------------------------------------------------------------------------------|-----|-------|------|------|
| 3-Cl-(S,S)Cy+L-Ala | 282(8.50×10 <sup>3</sup> ); 417(1.09×10 <sup>4</sup> )                             | 424 | 0.043 | 6.83 | 1.18 |
| 3-Cl-(S,S)Cy+D-Ala | 285(1.07×10 <sup>4</sup> ); 417(1.24×10 <sup>4</sup> )                             | 434 | 0.037 | 7.88 |      |
| 3-Cl-(S,S)Cy+L-Pro | 262(1.24×10 <sup>4</sup> ); 327(6.00×10 <sup>3</sup> ); 411(8.20×10 <sup>3</sup> ) | 478 | 0.066 | 11.0 | 1.37 |
| 3-Cl-(S,S)Cy+D-Pro | 265(9.40×10 <sup>3</sup> ); 327(5.10×10 <sup>3</sup> ); 406(4.40×10 <sup>3</sup> ) | 476 | 0.14  | 14.6 |      |
| 3-Cl-(S,S)Cy+L-Glu | 261(1.25×10 <sup>4</sup> ); 331(4.50×10 <sup>3</sup> ); 417(5.00×10 <sup>3</sup> ) | 430 | 0.041 | 5.60 | 1.01 |
| 3-Cl-(S,S)Cy+D-Glu | 265(1.13×10 <sup>4</sup> ); 326(7.00×10 <sup>3</sup> ); 414(6.80×10 <sup>3</sup> ) | 428 | 0.032 | 5.65 |      |
| 3-Cl-(S,S)Cy+L-Gln | 285(1.06×10 <sup>4</sup> ); 418(1.28×10 <sup>4</sup> )                             | 430 | 0.033 | 6.19 | 1.23 |
| 3-Cl-(S,S)Cy+D-Gln | 283(8.20×10 <sup>3</sup> ); 418(1.09×10 <sup>4</sup> )                             | 426 | 0.041 | 7.42 |      |
| 3-Cl-(S,S)Cy+L-Val | 286(1.62×10 <sup>4</sup> ); 411(1.54×10 <sup>4</sup> )                             | 435 | 0.020 | 5.94 | 1.57 |
| 3-Cl-(S,S)Cy+D-Val | 285(8.80×10 <sup>3</sup> ); 418(1.08×10 <sup>3</sup> )                             | 436 | 0.046 | 8.78 |      |
| 3-Cl-(S,S)Cy+L-Arg | 278(8.10×10 <sup>3</sup> ); 412(9.90×10 <sup>3</sup> )                             | 430 | 0.12  | 25.2 | 1.03 |
| 3-Cl-(S,S)Cy+D-Arg | 283(1.55×10 <sup>4</sup> ); 417(1.35×10 <sup>4</sup> )                             | 441 | 0.090 | 25.8 |      |
| 3-Cl-(S,S)Cy+L-Leu | 285(1.42×10 <sup>4</sup> ); 411(1.54×10 <sup>4</sup> )                             | 430 | 0.022 | 6.27 | 0.74 |
| 3-Cl-(S,S)Cy+D-Leu | 281(1.18×10 <sup>4</sup> ); 411(1.28×10 <sup>4</sup> )                             | 428 | 0.019 | 4.90 |      |
| 3-Cl-(S,S)Cy+L-Trp | 264(>1.00×10 <sup>6</sup> ); 293(>1.00×10 <sup>6</sup> )                           | 431 | 0.015 | 2.93 | 0.68 |
| 3-Cl-(S,S)Cy+D-Trp | 267(>1.00×10 <sup>6</sup> ); 273(>1.00×10 <sup>6</sup> )                           | 432 | 0.012 | 2.33 |      |
| 3-Cl-(S,S)Cy+L-Ser | 282(8.50×10 <sup>3</sup> ); 412(1.05×10 <sup>4</sup> )                             | 434 | 0.050 | 8.53 | 0.55 |
| 3-Cl-(S,S)Cy+D-Ser | 285(1.58×10 <sup>4</sup> ); 413(1.68×10 <sup>4</sup> )                             | 439 | 0.021 | 5.11 |      |
| 3-Cl-(S,S)Cy+L-His | 286(8.80×10 <sup>3</sup> ); 418(1.08×10 <sup>4</sup> )                             | 432 | 0.013 | 2.77 | 2.95 |
| 3-Cl-(S,S)Cy+D-His | 285(1.43×10 <sup>4</sup> ); 418(1.26×10 <sup>4</sup> )                             | 431 | 0.027 | 6.24 |      |

**Table. S7** Photophysical data of **3,5-Cl-(R,R)Cy** and **3,5-Cl-(S,S)Cy** DMSO solution upon the addition of 100 equivalent of different D- or L-amino acids. Sample without emission data means that it is non-emissive.  $ef = (I_D - I_0)/(I_L - I_0)$ .

| <b>3,5-Cl-Cy+amino acid</b> | $\lambda_{\text{abs}}/\text{nm}(\epsilon/\text{dm}^3 \text{ mol}^{-1} \text{ cm}^{-1})$ | $\lambda_{\text{em}}/\text{nm}$ | $\Phi$ | $I/I_0$ | $ef$ |
|-----------------------------|-----------------------------------------------------------------------------------------|---------------------------------|--------|---------|------|
| <b>3,5-Cl-(R,R)Cy</b>       | 263( $5.24 \times 10^4$ ); 425( $7.20 \times 10^3$ )                                    | 482                             | 0.011  |         |      |
| <b>3,5-Cl-(R,R)Cy+L-Ala</b> | 274( $3.25 \times 10^4$ ); 425( $1.71 \times 10^4$ )                                    | 488                             | 0.035  | 3.17    | 1.02 |
| <b>3,5-Cl-(R,R)Cy+D-Ala</b> | 271( $3.71 \times 10^4$ ); 427( $1.59 \times 10^4$ )                                    | 486                             | 0.045  | 3.21    |      |
| <b>3,5-Cl-(R,R)Cy+L-Pro</b> | 270( $3.68 \times 10^4$ ); 427( $1.42 \times 10^4$ )                                    | 488                             | 0.12   | 7.99    | 0.95 |
| <b>3,5-Cl-(R,R)Cy+D-Pro</b> | 270( $3.79 \times 10^4$ ); 426( $1.32 \times 10^4$ )                                    | 483                             | 0.13   | 7.61    |      |
| <b>3,5-Cl-(R,R)Cy+L-Glu</b> | 270( $3.68 \times 10^4$ ); 425( $1.46 \times 10^4$ )                                    | 436                             | 0.035  | 2.43    | 0.96 |
| <b>3,5-Cl-(R,R)Cy+D-Glu</b> | 270( $3.79 \times 10^4$ ); 427( $1.32 \times 10^4$ )                                    | 435                             | 0.036  | 2.36    |      |
| <b>3,5-Cl-(R,R)Cy+L-Gln</b> | 268( $3.88 \times 10^4$ ); 425( $1.71 \times 10^4$ )                                    | 434                             | 0.066  | 4.48    | 1.63 |
| <b>3,5-Cl-(R,R)Cy+D-Gln</b> | 270( $3.97 \times 10^4$ ); 425( $1.60 \times 10^4$ )                                    | 442                             | 0.075  | 7.16    |      |
| <b>3,5-Cl-(R,R)Cy+L-Val</b> | 270( $4.30 \times 10^4$ ); 427( $1.97 \times 10^4$ )                                    | 430                             | 0.035  | 2.81    | 1.75 |
| <b>3,5-Cl-(R,R)Cy+D-Val</b> | 277( $3.96 \times 10^4$ ); 427( $1.96 \times 10^4$ )                                    | 436                             | 0.044  | 4.71    |      |
| <b>3,5-Cl-(R,R)Cy+L-Arg</b> | 270( $3.78 \times 10^4$ ); 428( $1.44 \times 10^4$ )                                    | 482                             | 0.10   | 6.67    | 0.97 |
| <b>3,5-Cl-(R,R)Cy+D-Arg</b> | 269( $4.08 \times 10^4$ ); 425( $1.39 \times 10^4$ )                                    | 482                             | 0.072  | 6.56    |      |
| <b>3,5-Cl-(R,R)Cy+L-Leu</b> | 275( $4.00 \times 10^4$ ); 426( $1.62 \times 10^4$ )                                    | 435                             | 0.059  | 5.70    | 0.55 |
| <b>3,5-Cl-(R,R)Cy+D-Leu</b> | 275( $3.71 \times 10^4$ ); 428( $1.65 \times 10^4$ )                                    | 436                             | 0.051  | 3.28    |      |
| <b>3,5-Cl-(R,R)Cy+L-Trp</b> | 263( $>1.00 \times 10^6$ ); 267( $>1.00 \times 10^6$ )                                  | 425                             | 0.041  | 4.33    | 0.53 |
| <b>3,5-Cl-(R,R)Cy+D-Trp</b> | 275( $>1.00 \times 10^6$ ); 280( $>1.00 \times 10^6$ )                                  | 432                             | 0.031  | 2.80    |      |
| <b>3,5-Cl-(R,R)Cy+L-Ser</b> | 271( $3.61 \times 10^4$ ); 425( $1.56 \times 10^4$ )                                    | 440                             | 0.087  | 6.65    | 0.96 |
| <b>3,5-Cl-(R,R)Cy+D-Ser</b> | 270( $4.10 \times 10^4$ ); 427( $1.74 \times 10^4$ )                                    | 436                             | 0.068  | 6.40    |      |
| <b>3,5-Cl-(R,R)Cy+L-His</b> | 268( $4.11 \times 10^4$ ); 427( $1.31 \times 10^4$ )                                    | 430                             | 0.034  | 2.22    | 3.16 |
| <b>3,5-Cl-(R,R)Cy+D-His</b> | 270( $4.06 \times 10^4$ ); 425( $9.80 \times 10^3$ )                                    | 434                             | 0.071  | 6.80    |      |
| <b>3,5-Cl-(S,S)Cy</b>       | 264( $5.35 \times 10^4$ ); 425( $7.30 \times 10^3$ )                                    | 482                             |        |         |      |

|                      |                                                          |     |       |      |      |
|----------------------|----------------------------------------------------------|-----|-------|------|------|
| 3,5-Cl-(S,S)Cy+L-Ala | 270(3.91×10 <sup>4</sup> ); 425(1.84×10 <sup>4</sup> )   | 433 | 0.055 | 2.82 | 1.09 |
| 3,5-Cl-(S,S)Cy+D-Ala | 274(4.07×10 <sup>4</sup> ); 425(1.53×10 <sup>4</sup> )   | 436 | 0.068 | 3.05 |      |
| 3,5-Cl-(S,S)Cy+L-Pro | 267(3.68×10 <sup>4</sup> ); 426(1.99×10 <sup>4</sup> )   | 488 | 0.068 | 8.43 | 0.80 |
| 3,5-Cl-(S,S)Cy+D-Pro | 266(3.91×10 <sup>4</sup> ); 426(1.38×10 <sup>4</sup> )   | 488 | 0.099 | 6.87 |      |
| 3,5-Cl-(S,S)Cy+L-Glu | 268(3.68×10 <sup>4</sup> ); 425(1.28×10 <sup>4</sup> )   | 437 | 0.036 | 2.01 | 0.95 |
| 3,5-Cl-(S,S)Cy+D-Glu | 276(3.78×10 <sup>4</sup> ); 426(1.13×10 <sup>4</sup> )   | 432 | 0.044 | 1.93 |      |
| 3,5-Cl-(S,S)Cy+L-Gln | 265(3.91×10 <sup>4</sup> ); 427(1.72×10 <sup>4</sup> )   | 434 | 0.059 | 3.09 | 1.63 |
| 3,5-Cl-(S,S)Cy+D-Gln | 264(4.22×10 <sup>4</sup> ); 428(1.76×10 <sup>4</sup> )   | 434 | 0.059 | 4.88 |      |
| 3,5-Cl-(S,S)Cy+L-Val | 270(4.03×10 <sup>4</sup> ); 425(1.76×10 <sup>4</sup> )   | 430 | 0.061 | 5.09 | 0.55 |
| 3,5-Cl-(S,S)Cy+D-Val | 272(3.89×10 <sup>4</sup> ); 426(1.82×10 <sup>4</sup> )   | 439 | 0.035 | 2.89 |      |
| 3,5-Cl-(S,S)Cy+L-Arg | 270(3.78×10 <sup>4</sup> ); 428(1.44×10 <sup>4</sup> )   | 478 | 0.072 | 6.99 | 1.26 |
| 3,5-Cl-(S,S)Cy+D-Arg | 270(4.25×10 <sup>4</sup> ); 402(1.47×10 <sup>4</sup> )   | 447 | 0.12  | 8.77 |      |
| 3,5-Cl-(S,S)Cy+L-Leu | 266(4.16×10 <sup>4</sup> ); 426(1.56×10 <sup>4</sup> )   | 430 | 0.099 | 8.46 | 0.72 |
| 3,5-Cl-(S,S)Cy+D-Leu | 267(4.26×10 <sup>4</sup> ); 426(1.63×10 <sup>4</sup> )   | 433 | 0.079 | 6.17 |      |
| 3,5-Cl-(S,S)Cy+L-Trp | 279(>1.00×10 <sup>6</sup> ); 287(>1.00×10 <sup>6</sup> ) | 434 | 0.015 | 1.49 | 1.39 |
| 3,5-Cl-(S,S)Cy+D-Trp | 275(>1.00×10 <sup>6</sup> ); 285(>1.00×10 <sup>6</sup> ) | 431 | 0.031 | 2.02 |      |
| 3,5-Cl-(S,S)Cy+L-Ser | 274(4.06×10 <sup>4</sup> ); 425(1.79×10 <sup>4</sup> )   | 482 | 0.041 | 2.92 | 1.18 |
| 3,5-Cl-(S,S)Cy+D-Ser | 272(4.04×10 <sup>4</sup> ); 427(1.82×10 <sup>4</sup> )   | 439 | 0.048 | 3.41 |      |
| 3,5-Cl-(S,S)Cy+L-His | 264(3.94×10 <sup>4</sup> ); 426(1.18×10 <sup>4</sup> )   | 433 | 0.052 | 3.55 | 2.06 |
| 3,5-Cl-(S,S)Cy+D-His | 267(4.38×10 <sup>4</sup> ); 426(1.16×10 <sup>4</sup> )   | 432 | 0.072 | 7.11 |      |

**Table. S8** Photophysical data of **3-F-(R,R)diPh** and **3-F-(S,S)diPh** DMSO solution upon the addition of 100 equivalent of different D- or L-amino acids. Sample without emission data means that it is non-emissive.  $ef = (I_D - I_0)/(I_L - I_0)$ .

| <b>3-F-diPh+amino acid</b> | $\lambda_{\text{abs}}/\text{nm}(\epsilon/\text{dm}^3 \text{ mol}^{-1}\text{cm}^{-1})$ | $\lambda_{\text{em}}/\text{nm}$ | $\Phi$ | $I/I_0$ | $ef$ |
|----------------------------|---------------------------------------------------------------------------------------|---------------------------------|--------|---------|------|
| <b>3-F-(R,R)diPh</b>       | 260( $5.22 \times 10^3$ ); 420( $1.00 \times 10^3$ )                                  | 430                             | 0.0077 |         |      |
| <b>3-F-(R,R)diPh+L-Ala</b> | 323( $4.10 \times 10^3$ ); 412( $5.10 \times 10^3$ )                                  | 431                             | 0.042  | 40.6    | 0.84 |
| <b>3-F-(R,R)diPh+D-Ala</b> | 323( $3.70 \times 10^3$ ); 414( $4.80 \times 10^3$ )                                  | 430                             | 0.040  | 34.1    |      |
| <b>3-F-(R,R)diPh+L-Pro</b> | 333( $4.90 \times 10^3$ ); 413( $3.00 \times 10^3$ )                                  | 473                             | 0.11   | 143     | 1.43 |
| <b>3-F-(R,R)diPh+D-Pro</b> | 324( $4.50 \times 10^3$ ); 405( $3.70 \times 10^3$ )                                  | 472                             | 0.17   | 205     |      |
| <b>3-F-(R,R)diPh+L-Glu</b> | 323( $5.30 \times 10^3$ ); 414( $2.90 \times 10^3$ )                                  | 431                             | 0.030  | 32.3    | 1.45 |
| <b>3-F-(R,R)diPh+D-Glu</b> | 327( $8.50 \times 10^3$ ); 415( $6.50 \times 10^3$ )                                  | 431                             | 0.016  | 46.8    |      |
| <b>3-F-(R,R)diPh+L-Gln</b> | 323( $2.70 \times 10^3$ ); 413( $7.60 \times 10^3$ )                                  | 428                             | 0.056  | 99.2    | 1.32 |
| <b>3-F-(R,R)diPh+D-Gln</b> | 330( $3.30 \times 10^3$ ); 413( $6.50 \times 10^3$ )                                  | 431                             | 0.074  | 131     |      |
| <b>3-F-(R,R)diPh+L-Val</b> | 330( $3.80 \times 10^3$ ); 413( $6.50 \times 10^3$ )                                  | 429                             | 0.073  | 119     | 0.40 |
| <b>3-F-(R,R)diPh+D-Val</b> | 333( $3.30 \times 10^3$ ); 413( $5.90 \times 10^3$ )                                  | 430                             | 0.060  | 47.6    |      |
| <b>3-F-(R,R)diPh+L-Arg</b> | 263( $4.31 \times 10^4$ ); 412( $2.29 \times 10^3$ )                                  | 435                             | 0.0097 | 74.4    | 4.89 |
| <b>3-F-(R,R)diPh+D-Arg</b> | 268( $4.59 \times 10^4$ ); 413( $2.29 \times 10^4$ )                                  | 436                             | 0.054  | 364     |      |
| <b>3-F-(R,R)diPh+L-Leu</b> | 267( $1.89 \times 10^4$ ); 414( $5.80 \times 10^3$ )                                  | 429                             | 0.097  | 118     | 0.81 |
| <b>3-F-(R,R)diPh+D-Leu</b> | 267( $2.07 \times 10^4$ ); 414( $5.00 \times 10^3$ )                                  | 433                             | 0.080  | 95.6    |      |
| <b>3-F-(R,R)diPh+L-Trp</b> | 294( $>1.00 \times 10^6$ ); 414( $1.02 \times 10^4$ )                                 | 421                             | 0.063  | 127     | 0.73 |
| <b>3-F-(R,R)diPh+D-Trp</b> | 273( $>1.00 \times 10^6$ ); 414( $6.70 \times 10^3$ )                                 | 430                             | 0.060  | 92.7    |      |
| <b>3-F-(R,R)diPh+L-Ser</b> | 327( $3.60 \times 10^3$ ); 415( $5.50 \times 10^3$ )                                  | 432                             | 0.097  | 136     | 0.90 |
| <b>3-F-(R,R)diPh+D-Ser</b> | 328( $3.00 \times 10^3$ ); 413( $6.80 \times 10^3$ )                                  | 432                             | 0.075  | 122     |      |
| <b>3-F-(R,R)diPh+L-His</b> | 268( $1.56 \times 10^4$ ); 416( $5.80 \times 10^3$ )                                  | 431                             | 0.098  | 79.4    | 0.61 |
| <b>3-F-(R,R)diPh+D-His</b> | 267( $1.74 \times 10^4$ ); 413( $1.01 \times 10^4$ )                                  | 430                             | 0.062  | 48.4    |      |
| <b>3-F-(S,S)diPh</b>       | 260( $5.32 \times 10^3$ ); 420( $1.10 \times 10^3$ )                                  | 430                             | 0.0082 |         |      |

|                            |                                                          |     |       |      |      |
|----------------------------|----------------------------------------------------------|-----|-------|------|------|
| <b>3-F-(S,S)diPh+L-Ala</b> | 324(3.80×10 <sup>3</sup> ); 412(4.90×10 <sup>3</sup> )   | 434 | 0.040 | 67.3 | 1.53 |
| <b>3-F-(S,S)diPh+D-Ala</b> | 323(4.10×10 <sup>3</sup> ); 412(5.80×10 <sup>3</sup> )   | 430 | 0.062 | 103  |      |
| <b>3-F-(S,S)diPh+L-Pro</b> | 332(2.90×10 <sup>3</sup> ); 411(1.10×10 <sup>3</sup> )   | 473 | 0.040 | 79.1 | 2.11 |
| <b>3-F-(S,S)diPh+D-Pro</b> | 325(3.60×10 <sup>3</sup> ); 406(2.40×10 <sup>3</sup> )   | 471 | 0.082 | 167  |      |
| <b>3-F-(S,S)diPh+L-Glu</b> | 356(5.50×10 <sup>3</sup> ); 412(1.20×10 <sup>3</sup> )   | 432 | 0.021 | 33.5 | 0.91 |
| <b>3-F-(S,S)diPh+D-Glu</b> | 332(4.90×10 <sup>3</sup> ); 416(2.50×10 <sup>3</sup> )   | 436 | 0.020 | 30.5 |      |
| <b>3-F-(S,S)diPh+L-Gln</b> | 276(8.20×10 <sup>3</sup> ); 416(5.80×10 <sup>3</sup> )   | 431 | 0.096 | 125  | 0.86 |
| <b>3-F-(S,S)diPh+D-Gln</b> | 275(4.30×10 <sup>3</sup> ); 413(3.50×10 <sup>3</sup> )   | 427 | 0.041 | 108  |      |
| <b>3-F-(S,S)diPh+L-Val</b> | 330(3.50×10 <sup>3</sup> ); 414(4.50×10 <sup>3</sup> )   | 427 | 0.36  | 703  | 0.11 |
| <b>3-F-(S,S)diPh+D-Val</b> | 332(3.70×10 <sup>3</sup> ); 413(6.80×10 <sup>3</sup> )   | 433 | 0.030 | 77.3 |      |
| <b>3-F-(S,S)diPh+L-Arg</b> | 276(1.20×10 <sup>4</sup> ); 365(2.99×10 <sup>4</sup> )   | 432 | 0.012 | 249  | 0.33 |
| <b>3-F-(S,S)diPh+D-Arg</b> | 276(3.41×10 <sup>4</sup> ); 365(2.05×10 <sup>4</sup> )   | 440 | 0.035 | 82.2 |      |
| <b>3-F-(S,S)diPh+L-Leu</b> | 267(2.19×10 <sup>4</sup> ); 415(5.60×10 <sup>3</sup> )   | 426 | 0.059 | 93.7 | 5.25 |
| <b>3-F-(S,S)diPh+D-Leu</b> | 267(2.27×10 <sup>4</sup> ); 414(5.20×10 <sup>3</sup> )   | 423 | 0.21  | 492  |      |
| <b>3-F-(S,S)diPh+L-Trp</b> | 285(>1.00×10 <sup>6</sup> ); 355(9.00×10 <sup>3</sup> )  | 424 | 0.060 | 151  | 0.73 |
| <b>3-F-(S,S)diPh+D-Trp</b> | 294 (>1.00×10 <sup>6</sup> ); 359(1.09×10 <sup>4</sup> ) | 430 | 0.042 | 110  |      |
| <b>3-F-(S,S)diPh+L-Ser</b> | 326(3.10×10 <sup>3</sup> ); 415(6.50×10 <sup>3</sup> )   | 429 | 0.074 | 133  | 0.97 |
| <b>3-F-(S,S)diPh+D-Ser</b> | 327(3.30×10 <sup>3</sup> ); 413(5.80×10 <sup>3</sup> )   | 430 | 0.069 | 129  |      |
| <b>3-F-(S,S)diPh+L-His</b> | 294(7.59×10 <sup>4</sup> ); 365(1.01×10 <sup>4</sup> )   | 433 | 0.034 | 117  | 1.23 |
| <b>3-F-(S,S)diPh+D-His</b> | 293(7.71×10 <sup>4</sup> ); 365(1.21×10 <sup>4</sup> )   | 432 | 0.062 | 144  |      |

---

**Table. S9** Photophysical data of **3-Cl-(R,R)diPh** and **3-Cl-(S,S)diPh** DMSO solution upon the addition of 100 equivalent of different D- or L-amino acids. Sample without emission data means that it is non-emissive.  $ef = (I_D - I_0)/(I_L - I_0)$ .

| <b>3-Cl-diPh</b> +amino acid | $\lambda_{abs}$ /nm( $\epsilon$ /dm <sup>3</sup> mol <sup>-1</sup> cm <sup>-1</sup> ) | $\lambda_{em}$ /nm | $\Phi$ | $I/I_0$ | $ef$ |
|------------------------------|---------------------------------------------------------------------------------------|--------------------|--------|---------|------|
| <b>3-Cl-(R,R)diPh</b>        | 318( $5.50 \times 10^3$ ); 415( $1.70 \times 10^3$ )                                  | 456                | 0.021  |         |      |
| <b>3-Cl-(R,R)diPh</b> +L-Ala | 281( $1.09 \times 10^4$ ); 418( $1.04 \times 10^4$ )                                  | 435                | 0.047  | 14.8    | 1.53 |
| <b>3-Cl-(R,R)diPh</b> +D-Ala | 282 ( $1.00 \times 10^4$ ); 418( $6.70 \times 10^3$ )                                 | 432                | 0.072  | 22.6    |      |
| <b>3-Cl-(R,R)diPh</b> +L-Pro | 330( $4.00 \times 10^3$ ); 417( $3.10 \times 10^3$ )                                  | 480                | 0.23   | 35.9    | 1.30 |
| <b>3-Cl-(R,R)diPh</b> +D-Pro | 326( $4.00 \times 10^3$ ); 416( $3.50 \times 10^3$ )                                  | 483                | 0.31   | 46.6    |      |
| <b>3-Cl-(R,R)diPh</b> +L-Glu | 327( $5.10 \times 10^3$ ); 421( $2.00 \times 10^3$ )                                  | 434                | 0.16   | 10.8    | 0.91 |
| <b>3-Cl-(R,R)diPh</b> +D-Glu | 330( $6.30 \times 10^3$ ); 419( $2.20 \times 10^3$ )                                  | 433                | 0.11   | 9.83    |      |
| <b>3-Cl-(R,R)diPh</b> +L-Gln | 326( $2.50 \times 10^3$ ); 417( $1.04 \times 10^4$ )                                  | 431                | 0.050  | 20.7    | 0.68 |
| <b>3-Cl-(R,R)diPh</b> +D-Gln | 326( $2.80 \times 10^3$ ); 417( $5.80 \times 10^3$ )                                  | 432                | 0.063  | 14.1    |      |
| <b>3-Cl-(R,R)diPh</b> +L-Val | 293( $3.90 \times 10^3$ ); 419( $1.12 \times 10^4$ )                                  | 426                | 0.030  | 10.5    | 2.78 |
| <b>3-Cl-(R,R)diPh</b> +D-Val | 290( $2.30 \times 10^3$ ); 414( $9.50 \times 10^3$ )                                  | 429                | 0.068  | 29.2    |      |
| <b>3-Cl-(R,R)diPh</b> +L-Arg | 326( $3.50 \times 10^3$ ); 417( $4.90 \times 10^3$ )                                  | 431                | 0.062  | 12.8    | 4.43 |
| <b>3-Cl-(R,R)diPh</b> +D-Arg | 289( $3.30 \times 10^3$ ); 416( $1.35 \times 10^4$ )                                  | 472                | 0.12   | 56.7    |      |
| <b>3-Cl-(R,R)diPh</b> +L-Leu | 329( $3.90 \times 10^3$ ); 419( $6.10 \times 10^3$ )                                  | 432                | 0.040  | 9.04    | 1.15 |
| <b>3-Cl-(R,R)diPh</b> +D-Leu | 326( $4.60 \times 10^3$ ); 417( $3.60 \times 10^3$ )                                  | 430                | 0.066  | 10.4    |      |
| <b>3-Cl-(R,R)diPh</b> +L-Trp | 262( $>1.00 \times 10^6$ ); 417( $1.35 \times 10^4$ )                                 | 426                | 0.076  | 53.4    | 0.18 |
| <b>3-Cl-(R,R)diPh</b> +D-Trp | 273( $>1.00 \times 10^6$ ); 418( $6.40 \times 10^3$ )                                 | 431                | 0.035  | 9.61    |      |
| <b>3-Cl-(R,R)diPh</b> +L-Ser | 326( $3.20 \times 10^3$ ); 417( $3.70 \times 10^3$ )                                  | 438                | 0.040  | 6.23    | 0.92 |
| <b>3-Cl-(R,R)diPh</b> +D-Ser | 327( $3.40 \times 10^3$ ); 417( $3.60 \times 10^3$ )                                  | 432                | 0.037  | 5.73    |      |
| <b>3-Cl-(R,R)diPh</b> +L-His | 327( $2.40 \times 10^3$ ); 417( $7.60 \times 10^3$ )                                  | 423                | 0.098  | 38.9    | 0.56 |
| <b>3-Cl-(R,R)diPh</b> +D-His | 327( $2.10 \times 10^3$ ); 420( $8.50 \times 10^3$ )                                  | 432                | 0.062  | 21.8    |      |
| <b>3-Cl-(S,S)diPh</b>        | 318( $5.60 \times 10^3$ ); 415( $1.80 \times 10^3$ )                                  | 456                | 0.023  |         |      |

|                             |                                                         |     |       |      |      |
|-----------------------------|---------------------------------------------------------|-----|-------|------|------|
| <b>3-Cl-(S,S)diPh+L-Ala</b> | 281(1.10×10 <sup>4</sup> ); 418(1.04×10 <sup>4</sup> )  | 461 | 0.031 | 11.2 |      |
| <b>3-Cl-(S,S)diPh+D-Ala</b> | 282 (1.00×10 <sup>4</sup> ); 420(8.60×10 <sup>3</sup> ) | 474 | 0.041 | 11.6 | 1.04 |
| <b>3-Cl-(S,S)diPh+L-Pro</b> | 326(5.40×10 <sup>3</sup> ); 418(4.10×10 <sup>3</sup> )  | 474 | 0.14  | 35.3 |      |
| <b>3-Cl-(S,S)diPh+D-Pro</b> | 327(5.60×10 <sup>3</sup> ); 414(6.00×10 <sup>3</sup> )  | 476 | 0.15  | 53.6 | 1.52 |
| <b>3-Cl-(S,S)diPh+L-Glu</b> | 326(5.40×10 <sup>3</sup> ); 421(2.10×10 <sup>3</sup> )  | 429 | 0.11  | 10.9 |      |
| <b>3-Cl-(S,S)diPh+D-Glu</b> | 330(5.90×10 <sup>3</sup> ); 420(2.00×10 <sup>3</sup> )  | 431 | 0.048 | 6.54 | 0.60 |
| <b>3-Cl-(S,S)diPh+L-Gln</b> | 326(5.60×10 <sup>3</sup> ); 417(1.10×10 <sup>4</sup> )  | 439 | 0.18  | 57.9 |      |
| <b>3-Cl-(S,S)diPh+D-Gln</b> | 327(5.20×10 <sup>3</sup> ); 422(3.60×10 <sup>3</sup> )  | 432 | 0.050 | 12.2 | 0.21 |
| <b>3-Cl-(S,S)diPh+L-Val</b> | 282(1.38×10 <sup>4</sup> ); 419(1.39×10 <sup>4</sup> )  | 431 | 0.032 | 9.66 |      |
| <b>3-Cl-(S,S)diPh+D-Val</b> | 284(1.29×10 <sup>3</sup> ); 416(1.22×10 <sup>4</sup> )  | 428 | 0.12  | 33.6 | 3.48 |
| <b>3-Cl-(S,S)diPh+L-Arg</b> | 326(4.10×10 <sup>3</sup> ); 420(6.90×10 <sup>3</sup> )  | 434 | 0.030 | 8.67 |      |
| <b>3-Cl-(S,S)diPh+D-Arg</b> | 266(1.36×10 <sup>4</sup> ); 416(1.37×10 <sup>4</sup> )  | 474 | 0.090 | 47.5 | 5.48 |
| <b>3-Cl-(S,S)diPh+L-Leu</b> | 287(1.27×10 <sup>4</sup> ); 421(1.19×10 <sup>4</sup> )  | 426 | 0.057 | 29.7 |      |
| <b>3-Cl-(S,S)diPh+D-Leu</b> | 275(1.02×10 <sup>4</sup> ); 421(8.10×10 <sup>3</sup> )  | 431 | 0.030 | 8.32 | 0.28 |
| <b>3-Cl-(S,S)diPh+L-Trp</b> | 266(>1.00×10 <sup>6</sup> ); 421(1.28×10 <sup>4</sup> ) | 424 | 0.071 | 47.9 |      |
| <b>3-Cl-(S,S)diPh+D-Trp</b> | 268(>1.00×10 <sup>6</sup> ); 414(5.80×10 <sup>3</sup> ) | 432 | 0.052 | 17.7 | 0.37 |
| <b>3-Cl-(S,S)diPh+L-Ser</b> | 327(3.80×10 <sup>3</sup> ); 417(5.90×10 <sup>3</sup> )  | 431 | 0.037 | 9.02 |      |
| <b>3-Cl-(S,S)diPh+D-Ser</b> | 327(3.60×10 <sup>3</sup> ); 419(6.70×10 <sup>3</sup> )  | 434 | 0.091 | 25.9 | 2.87 |
| <b>3-Cl-(S,S)diPh+L-His</b> | 327(3.00×10 <sup>3</sup> ); 420(7.90×10 <sup>3</sup> )  | 432 | 0.068 | 26.7 |      |
| <b>3-Cl-(S,S)diPh+D-His</b> | 327(4.50×10 <sup>3</sup> ); 420(1.12×10 <sup>4</sup> )  | 433 | 0.031 | 16.1 | 0.60 |

---

**Table. S10** Photophysical data of **3,5-Cl-(R,R)diPh** and **3,5-Cl-(S,S)diPh** DMSO solution upon the addition of 100 equivalent of different D- or L-amino acids. Sample without emission data means that it is non-emissive.  $ef = (I_D - I_0)/(I_L - I_0)$ .

| <b>3,5-Cl-diPh</b> +amino acid | $\lambda_{\text{abs}}/\text{nm}(\epsilon/\text{dm}^3 \text{ mol}^{-1} \text{ cm}^{-1})$ | $\lambda_{\text{em}}/\text{nm}$ | $\Phi$ | $I/I_0$ | $ef$ |
|--------------------------------|-----------------------------------------------------------------------------------------|---------------------------------|--------|---------|------|
| <b>3,5-Cl-(R,R)diPh</b>        | 266( $2.46 \times 10^4$ ); 334 ( $9.70 \times 10^3$ ); 420( $4.90 \times 10^3$ )        | 475                             | 0.061  |         |      |
| <b>3,5-Cl-(R,R)diPh</b> +L-Ala | 275( $1.04 \times 10^4$ ); 287( $8.20 \times 10^3$ ); 430( $1.37 \times 10^4$ )         | 485                             | 0.16   | 11.3    | 0.74 |
| <b>3,5-Cl-(R,R)diPh</b> +D-Ala | 276( $7.60 \times 10^3$ ); 286( $7.30 \times 10^3$ ); 427( $1.22 \times 10^4$ )         | 489                             | 0.097  | 8.36    |      |
| <b>3,5-Cl-(R,R)diPh</b> +L-Pro | 269( $7.80 \times 10^3$ ); 429( $9.10 \times 10^3$ )                                    | 495                             | 0.19   | 13.5    | 0.78 |
| <b>3,5-Cl-(R,R)diPh</b> +D-Pro | 269( $8.20 \times 10^3$ ); 430( $8.90 \times 10^3$ )                                    | 491                             | 0.19   | 10.5    |      |
| <b>3,5-Cl-(R,R)diPh</b> +L-Glu | 267( $7.90 \times 10^3$ ); 285( $6.90 \times 10^3$ ); 431( $7.80 \times 10^3$ )         | 442                             | 0.095  | 5.3     | 0.78 |
| <b>3,5-Cl-(R,R)diPh</b> +D-Glu | 267( $9.20 \times 10^3$ ); 285( $7.60 \times 10^3$ ); 431( $7.80 \times 10^3$ )         | 450                             | 0.084  | 4.13    |      |
| <b>3,5-Cl-(R,R)diPh</b> +L-Gln | 267( $8.90 \times 10^3$ ); 285( $8.40 \times 10^3$ ); 431( $1.21 \times 10^4$ )         | 486                             | 0.11   | 6.89    | 2.93 |
| <b>3,5-Cl-(R,R)diPh</b> +D-Gln | 264( $1.07 \times 10^4$ ); 282( $8.20 \times 10^3$ ); 426( $1.16 \times 10^4$ )         | 436                             | 0.22   | 20.2    |      |
| <b>3,5-Cl-(R,R)diPh</b> +L-Val | 267( $1.08 \times 10^4$ ); 285( $1.08 \times 10^4$ ); 428( $1.54 \times 10^4$ )         | 430                             | 0.090  | 6.65    | 0.70 |
| <b>3,5-Cl-(R,R)diPh</b> +D-Val | 268( $7.70 \times 10^3$ ); 289( $8.50 \times 10^3$ ); 425( $1.21 \times 10^4$ )         | 430                             | 0.10   | 4.66    |      |
| <b>3,5-Cl-(R,R)diPh</b> +L-Arg | 267( $1.10 \times 10^4$ ); 425( $1.30 \times 10^4$ )                                    | 444                             | 0.26   | 20.3    | 0.91 |
| <b>3,5-Cl-(R,R)diPh</b> +D-Arg | 269( $1.09 \times 10^4$ ); 417( $1.44 \times 10^4$ )                                    | 482                             | 0.27   | 18.5    |      |
| <b>3,5-Cl-(R,R)diPh</b> +L-Leu | 269( $1.53 \times 10^4$ ); 429( $1.91 \times 10^4$ )                                    | 429                             | 0.054  | 4.93    | 0.79 |
| <b>3,5-Cl-(R,R)diPh</b> +D-Leu | 268( $1.42 \times 10^4$ ); 430( $1.08 \times 10^4$ )                                    | 482                             | 0.092  | 3.89    |      |
| <b>3,5-Cl-(R,R)diPh</b> +L-Trp | 283( $>1.00 \times 10^6$ ); 429( $1.26 \times 10^4$ )                                   | 435                             | 0.091  | 6.46    | 0.84 |
| <b>3,5-Cl-(R,R)diPh</b> +D-Trp | 288( $>1.00 \times 10^6$ ); 431( $1.39 \times 10^4$ )                                   | 434                             | 0.067  | 5.43    |      |
| <b>3,5-Cl-(R,R)diPh</b> +L-Ser | 274( $1.01 \times 10^4$ ); 429( $1.20 \times 10^4$ )                                    | 447                             | 0.099  | 6.34    | 0.98 |
| <b>3,5-Cl-(R,R)diPh</b> +D-Ser | 282( $9.80 \times 10^3$ ); 430( $1.31 \times 10^4$ )                                    | 483                             | 0.12   | 6.21    |      |
| <b>3,5-Cl-(R,R)diPh</b> +L-His | 288( $6.40 \times 10^3$ ); 430( $6.70 \times 10^3$ ) 0.027                              | 431                             | 0.13   | 4.67    | 2.46 |
| <b>3,5-Cl-(R,R)diPh</b> +D-His | 288( $6.50 \times 10^4$ ); 430( $6.70 \times 10^3$ ) 0.027                              | 432                             | 0.25   | 11.5    |      |
| <b>3,5-Cl-(S,S)diPh</b>        | 264( $2.31 \times 10^4$ ); 336 ( $6.90 \times 10^3$ ); 433( $3.20 \times 10^3$ )        | 475                             | 0.068  |         |      |



|                               |                                                                                    |     |       |      |       |
|-------------------------------|------------------------------------------------------------------------------------|-----|-------|------|-------|
| <b>3,5-Cl-(S,S)diPh+L-Ala</b> | 274(1.03×10 <sup>4</sup> ); 282(9.30×10 <sup>3</sup> ); 427(1.44×10 <sup>4</sup> ) | 437 | 0.18  | 18.2 | 0.45  |
| <b>3,5-Cl-(S,S)diPh+D-Ala</b> | 274(8.70×10 <sup>3</sup> ); 284(8.00×10 <sup>3</sup> ); 424(1.24×10 <sup>4</sup> ) | 444 | 0.13  | 8.19 |       |
| <b>3,5-Cl-(S,S)diPh+L-Pro</b> | 267(7.70×10 <sup>3</sup> ); 425(9.10×10 <sup>3</sup> )                             | 473 | 0.15  | 10.7 | 0.99  |
| <b>3,5-Cl-(S,S)diPh+D-Pro</b> | 267(8.30×10 <sup>3</sup> ); 427(8.70×10 <sup>3</sup> )                             | 471 | 0.16  | 10.6 |       |
| <b>3,5-Cl-(S,S)diPh+L-Glu</b> | 267(9.10×10 <sup>3</sup> ); 285(7.50×10 <sup>3</sup> ); 430(8.50×10 <sup>3</sup> ) | 438 | 0.092 | 4.33 | 1.29  |
| <b>3,5-Cl-(S,S)diPh+D-Glu</b> | 267(8.90×10 <sup>3</sup> ); 285(6.80×10 <sup>3</sup> ); 430(8.40×10 <sup>3</sup> ) | 437 | 0.090 | 5.59 |       |
| <b>3,5-Cl-(S,S)diPh+L-Gln</b> | 267(1.11×10 <sup>4</sup> ); 284(1.01×10 <sup>4</sup> ); 430(1.39×10 <sup>4</sup> ) | 438 | 0.081 | 5.82 | 6.22  |
| <b>3,5-Cl-(S,S)diPh+D-Gln</b> | 267(1.18×10 <sup>4</sup> ); 285(9.20×10 <sup>3</sup> ); 427(1.12×10 <sup>4</sup> ) | 435 | 0.24  | 36.2 |       |
| <b>3,5-Cl-(S,S)diPh+L-Val</b> | 267(1.35×10 <sup>4</sup> ); 285(1.32×10 <sup>4</sup> ); 426(1.69×10 <sup>4</sup> ) | 432 | 0.075 | 7.84 | 0.56  |
| <b>3,5-Cl-(S,S)diPh+D-Val</b> | 267(1.32×10 <sup>4</sup> ); 285(1.16×10 <sup>4</sup> ); 425(1.45×10 <sup>4</sup> ) | 433 | 0.050 | 4.39 |       |
| <b>3,5-Cl-(S,S)diPh+L-Arg</b> | 267(2.35×10 <sup>4</sup> ); 429(1.86×10 <sup>4</sup> )                             | 482 | 0.19  | 15.8 | 2.827 |
| <b>3,5-Cl-(S,S)diPh+D-Arg</b> | 272(1.25×10 <sup>4</sup> ); 424(1.13×10 <sup>4</sup> )                             | 447 | 0.15  | 35.8 |       |
| <b>3,5-Cl-(S,S)diPh+L-Leu</b> | 268(1.05×10 <sup>4</sup> ); 426(1.35×10 <sup>4</sup> )                             | 430 | 0.10  | 4.2  | 0.53  |
| <b>3,5-Cl-(S,S)diPh+D-Leu</b> | 267(1.17×10 <sup>4</sup> ); 427(1.26×10 <sup>4</sup> )                             | 430 | 0.071 | 2.23 |       |
| <b>3,5-Cl-(S,S)diPh+L-Trp</b> | 275(>1.00×10 <sup>6</sup> ); 431(1.35×10 <sup>4</sup> )                            | 436 | 0.051 | 2.95 | 2.13  |
| <b>3,5-Cl-(S,S)diPh+D-Trp</b> | 286(>1.00×10 <sup>6</sup> ); 433(1.33×10 <sup>4</sup> )                            | 434 | 0.067 | 6.31 |       |
| <b>3,5-Cl-(S,S)diPh+L-Ser</b> | 272(8.40×10 <sup>3</sup> ); 430(1.23×10 <sup>4</sup> )                             | 438 | 0.080 | 5.42 | 0.91  |
| <b>3,5-Cl-(S,S)diPh+D-Ser</b> | 285(9.40×10 <sup>4</sup> ); 431(1.23×10 <sup>4</sup> )                             | 440 | 0.084 | 4.93 |       |
| <b>3,5-Cl-(S,S)diPh+L-His</b> | 287(8.40×10 <sup>3</sup> ); 430(9.20×10 <sup>3</sup> ) 0.047                       | 439 | 0.070 | 4.46 | 2.71  |
| <b>3,5-Cl-(S,S)diPh+D-His</b> | 287(9.80×10 <sup>4</sup> ); 429(1.01×10 <sup>4</sup> ) 0.060                       | 431 | 0.12  | 12.3 |       |

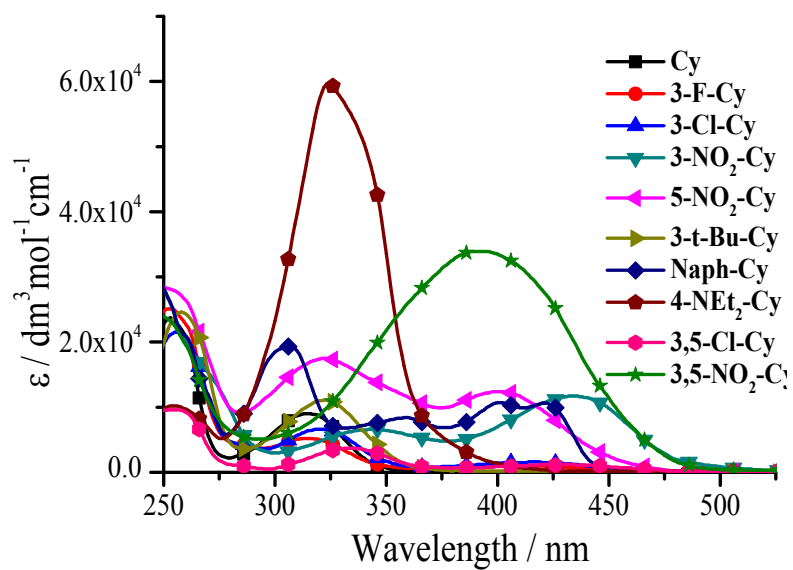

**Fig. S1** Absorption spectra of some selected Cys in MeCN.

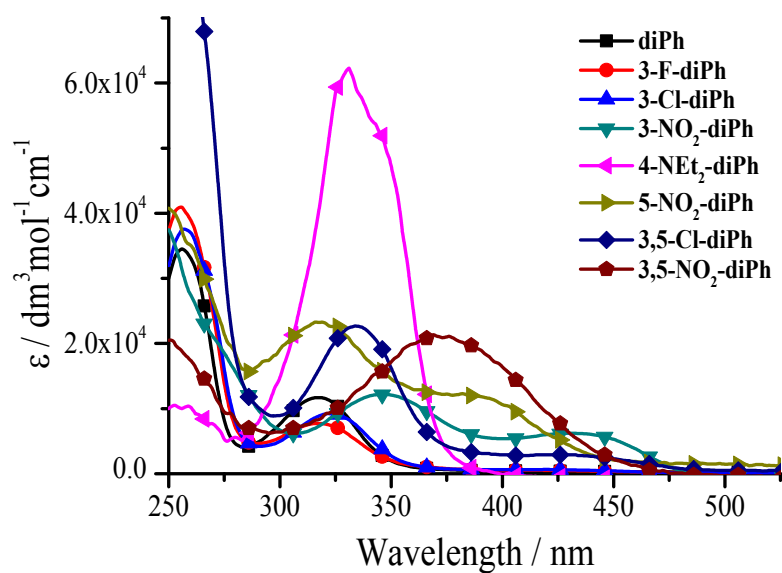

**Fig. S2** Absorption spectra of some selected **diPhs** in MeCN.

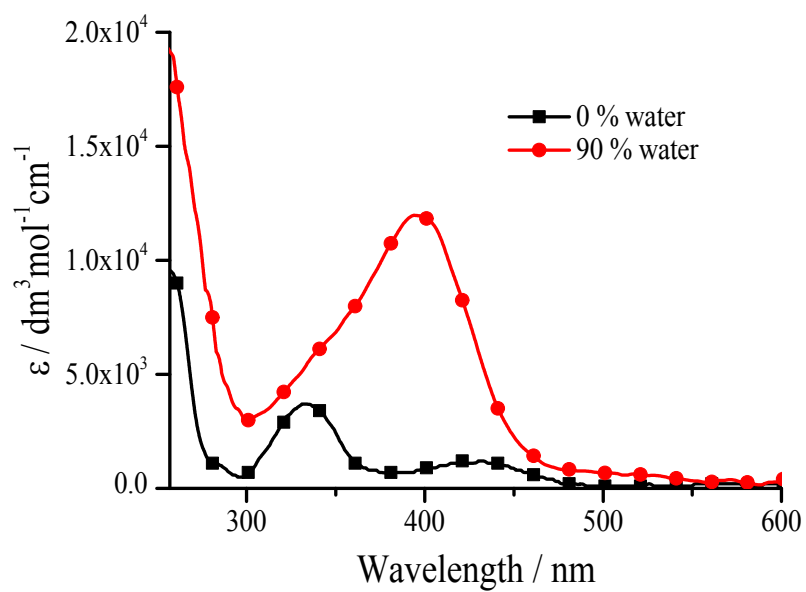

**Fig. S3** Absorption spectra of **3,5-Cl-Cy** in MeCN-H<sub>2</sub>O with different *f* values ( $1.0 \times 10^{-5}$  mol dm<sup>-3</sup>).

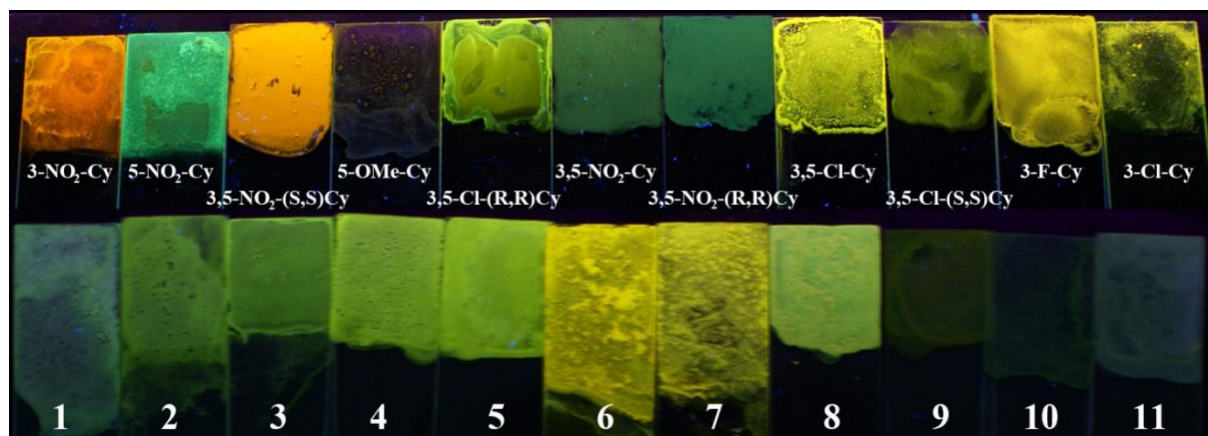

**Fig. S4** Photographs (under 360 nm UV light) of casting films of Cys (top) and diPhs (bottom: 1 = diPh; 2 = 3-F-(R,R)diPh; 3 = 3-Cl-(S,S)diPh; 5 = 3-Cl-(R,R)diPh; 6 = 3,5-Cl-(R,R)diPh; 7 = 3-Cl-(S,S)diPh; 8 = 5-NO<sub>2</sub>-diPh; 9 = 3-NO<sub>2</sub>-diPh; 10 = Naph-diPh; 11 = 4-NEt<sub>2</sub>-diPh;).

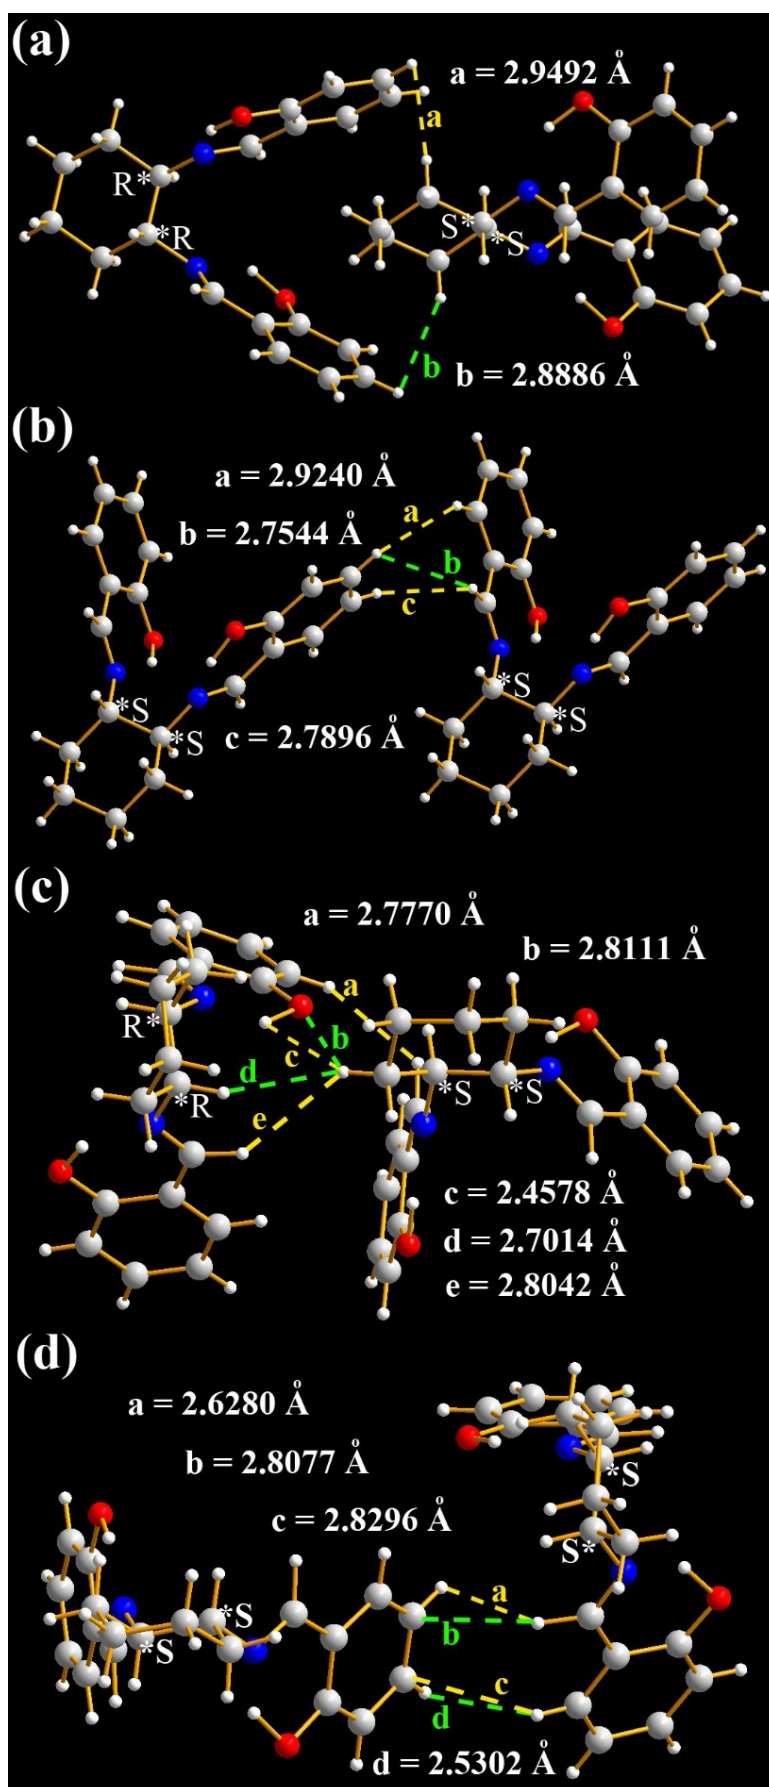

**Fig. S5** X-ray single crystal structures and packing of Cy molecules: (a) and (b), intermolecular interactions of the two closest molecules; (c) enantiomers.

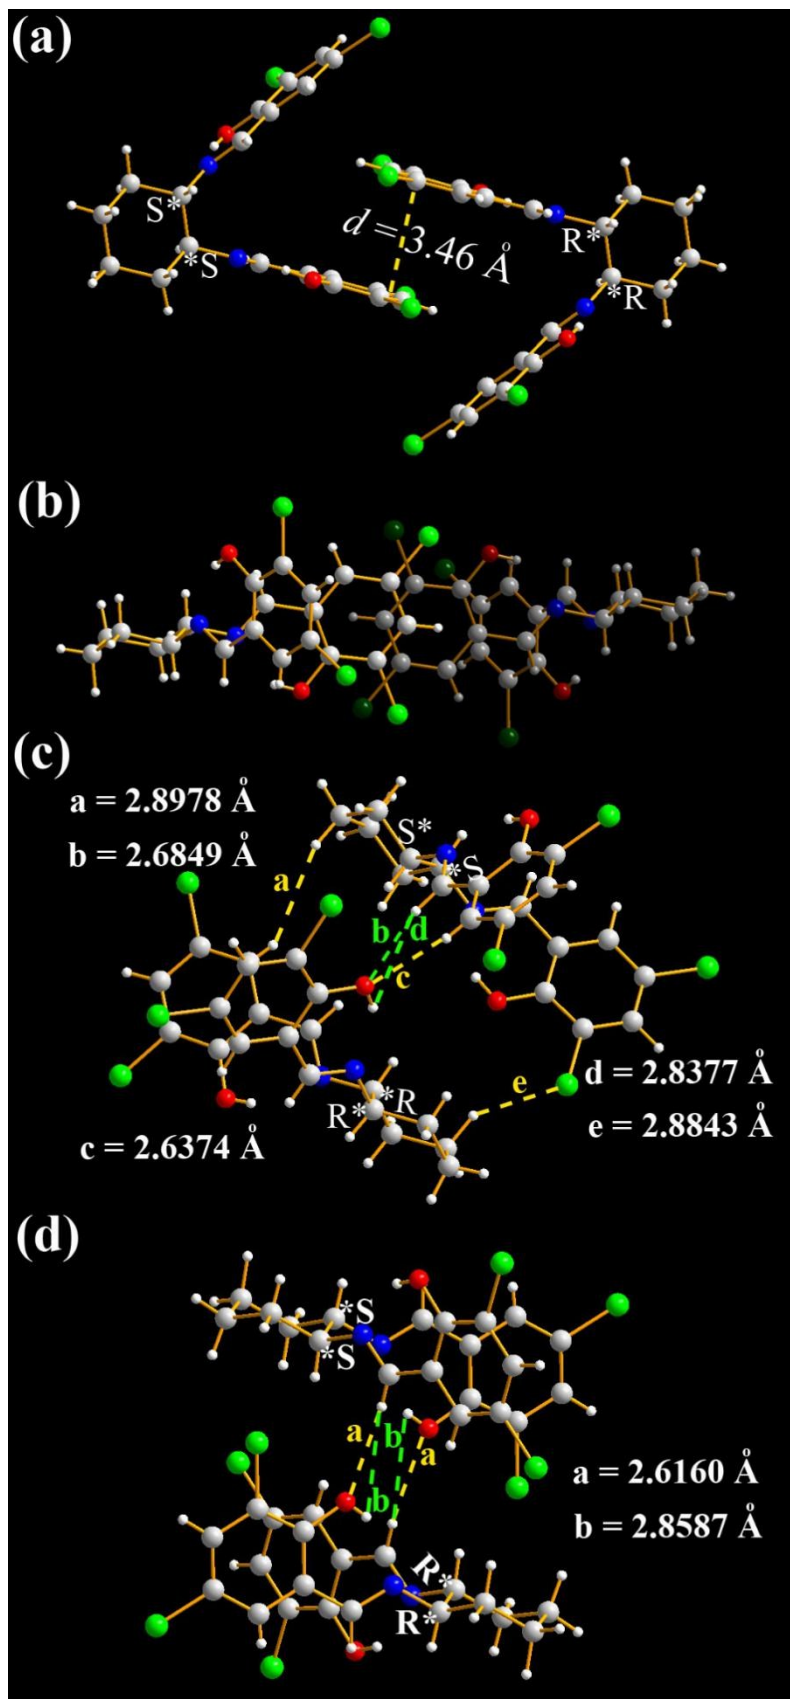

**Fig. S6** X-ray single crystal structures and packing of 3,5-Cl-Cy molecules (a: side view of face-to-face  $\pi$ - $\pi$  interactions; b: top view of face-to-face  $\pi$ - $\pi$  interactions).

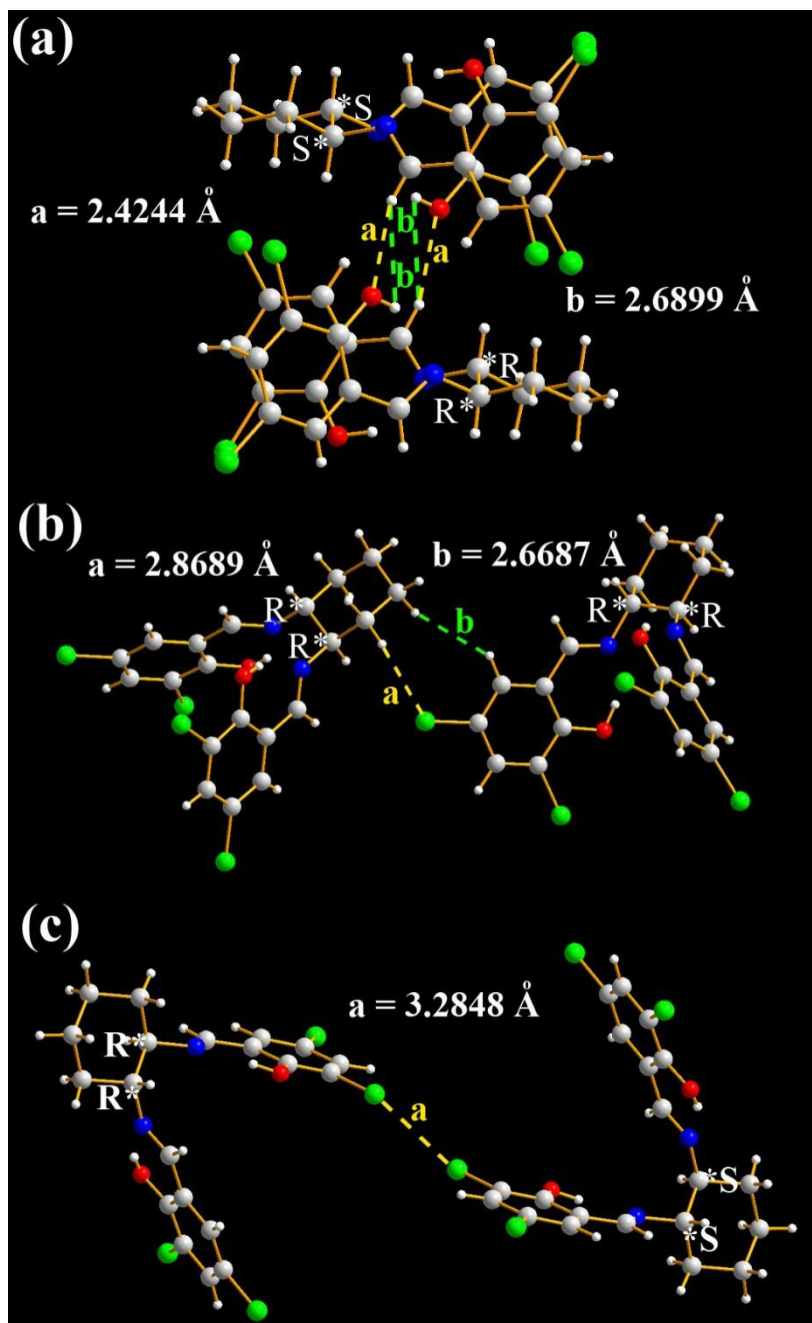

**Fig. S7** X-ray single crystal structures and packing of 3,5-Cl-Cy molecules.

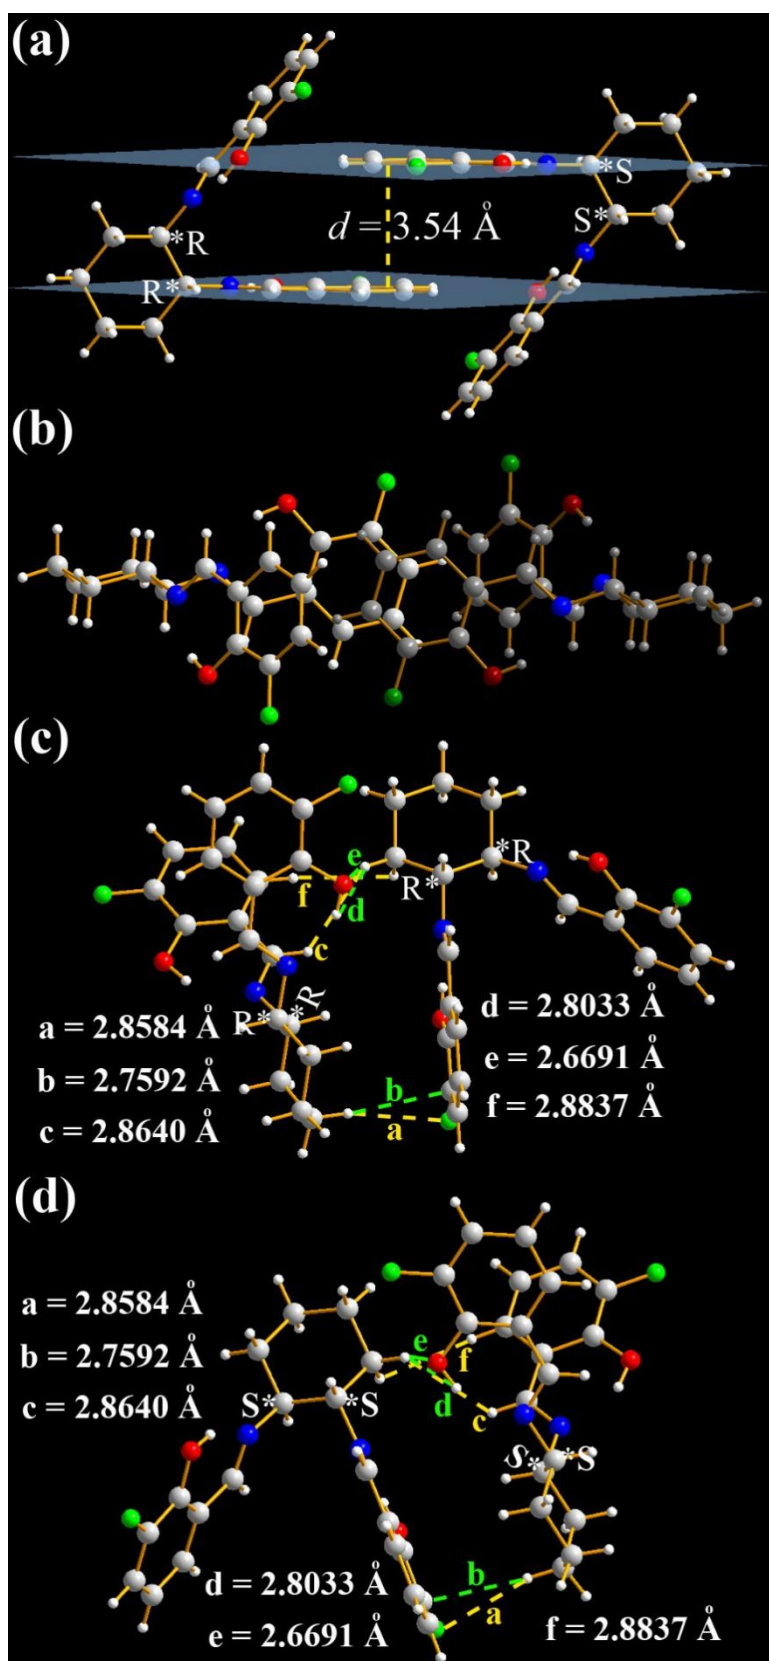

**Fig. S8** X-ray single crystal structures and packing of 3-F-Cy molecules (a: side view of face-to-face  $\pi$ - $\pi$  interactions; b: top view of face-to-face  $\pi$ - $\pi$  interactions).



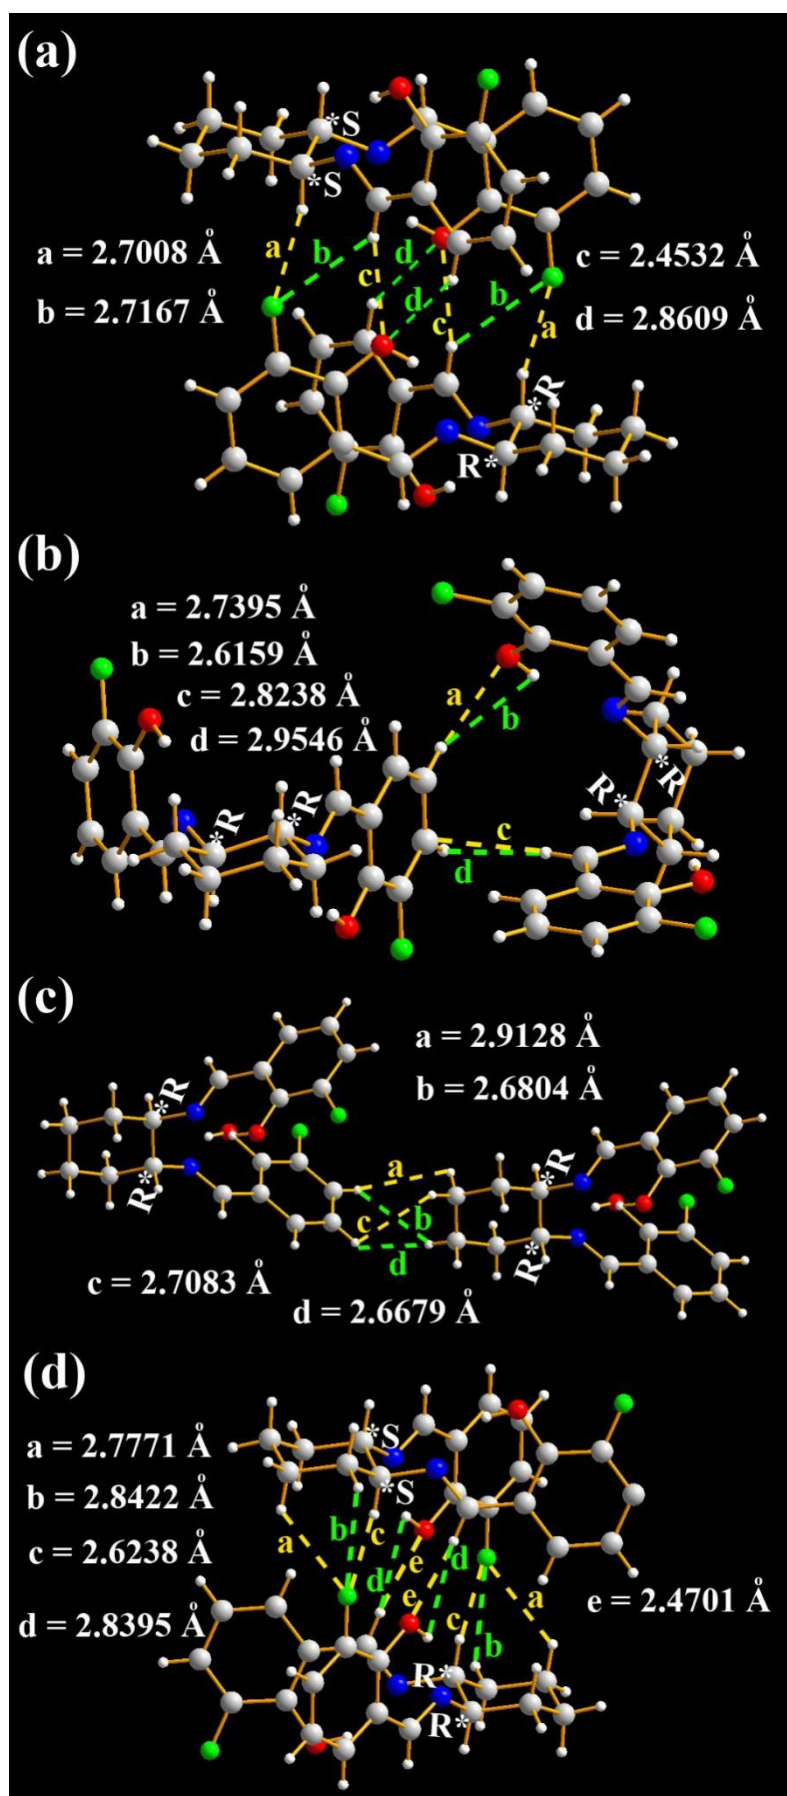

**Fig. S9** X-ray single crystal structures and packing of 3-F-Cy molecules.

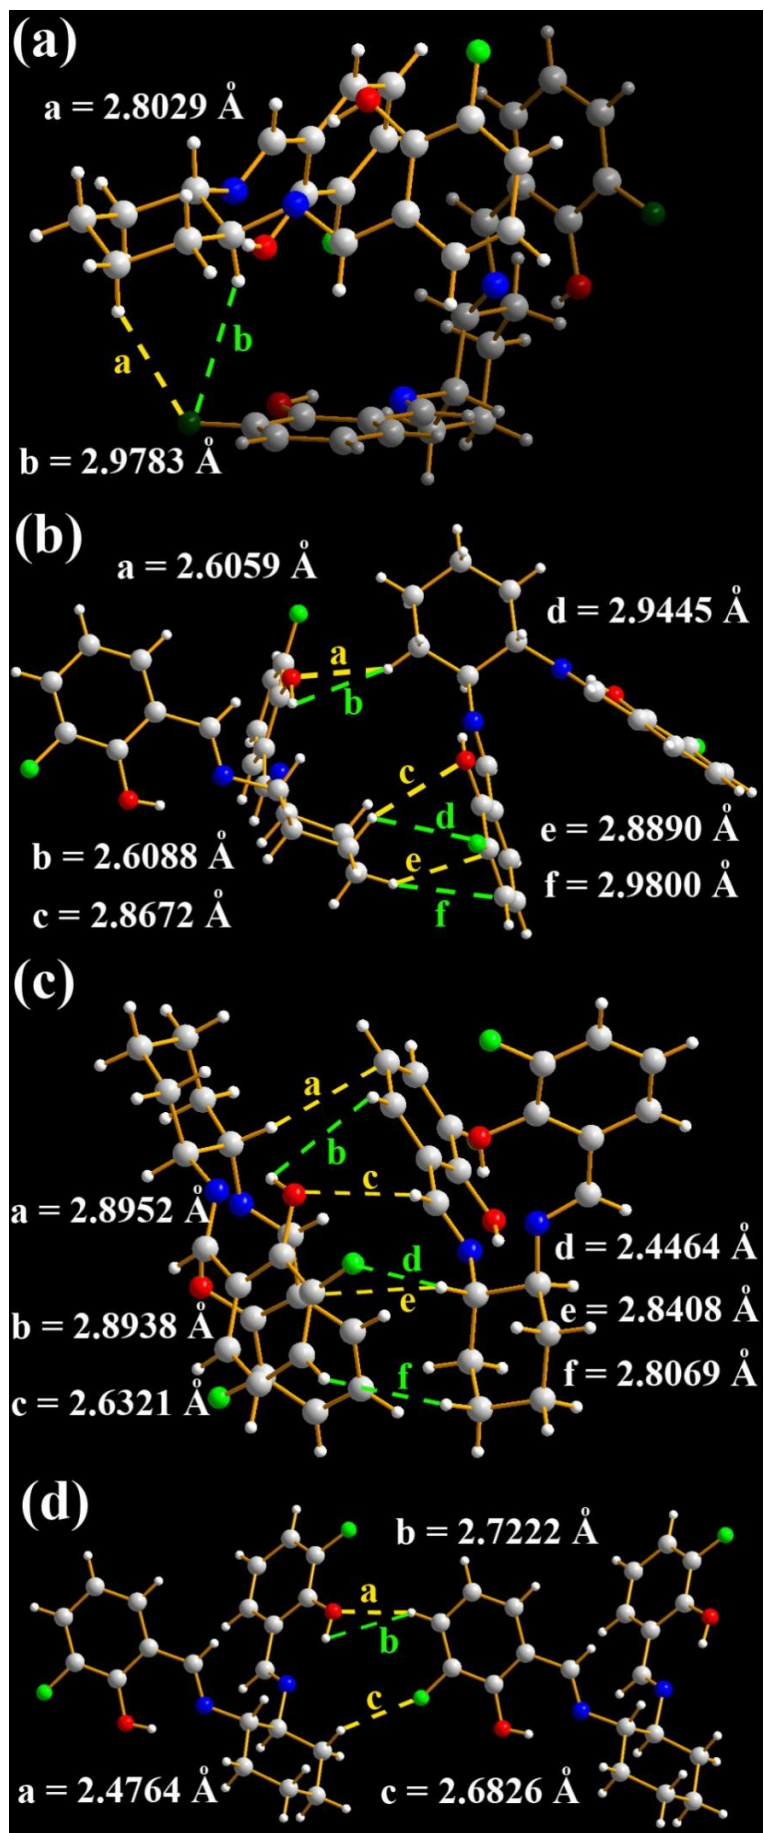

**Fig. S10** X-ray single crystal structures and packing of 3-F-(S,S)Cy molecules.

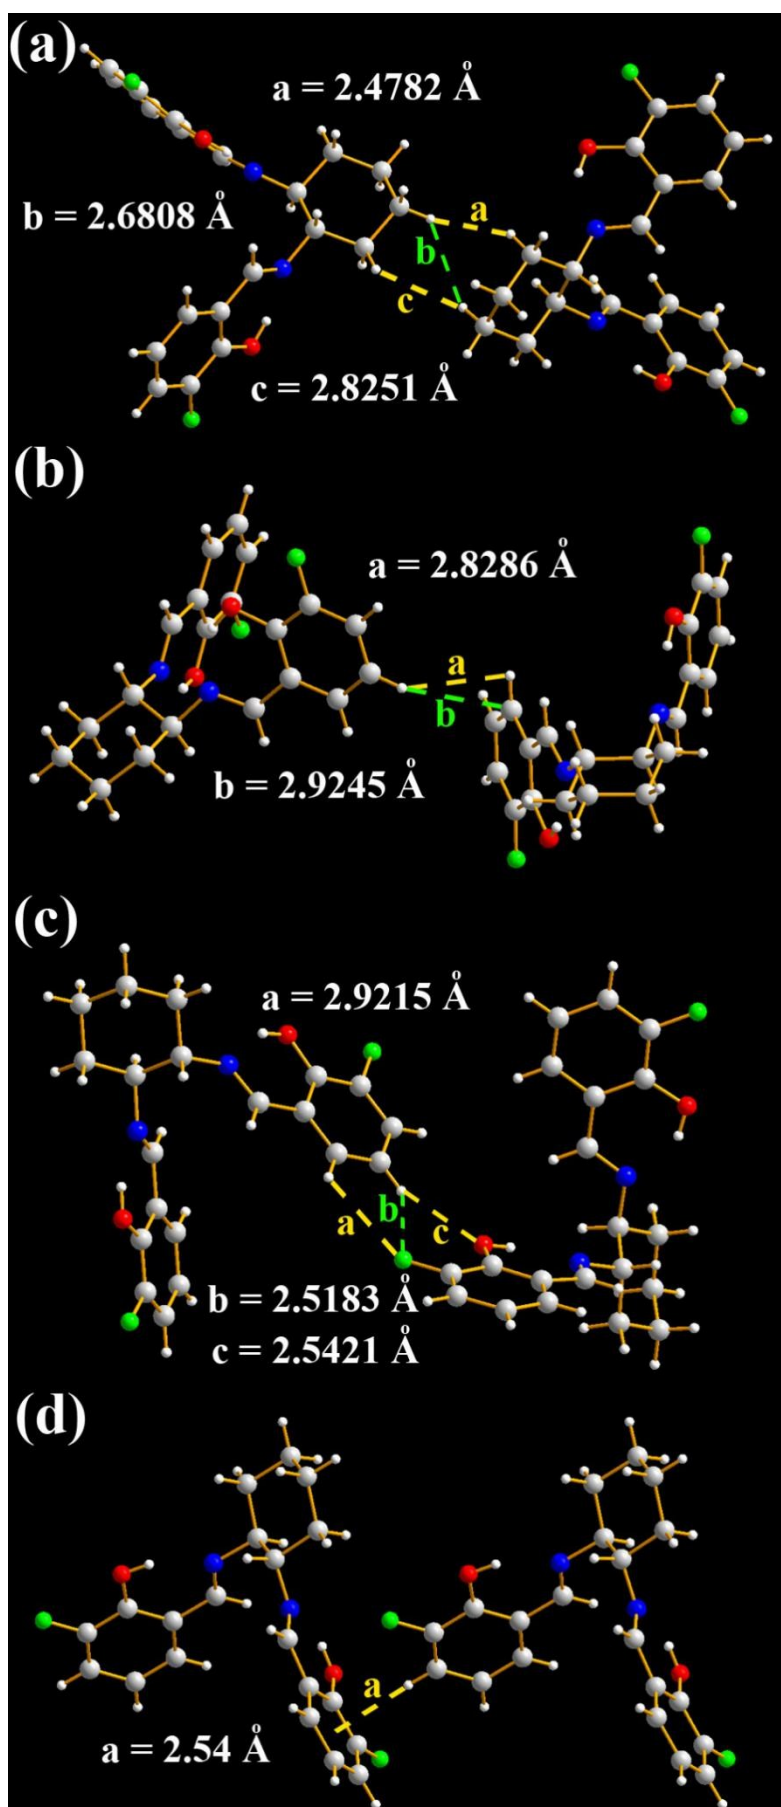

Fig. S11 X-ray single crystal structures and packing of 3-F-(S,S)Cy molecules.

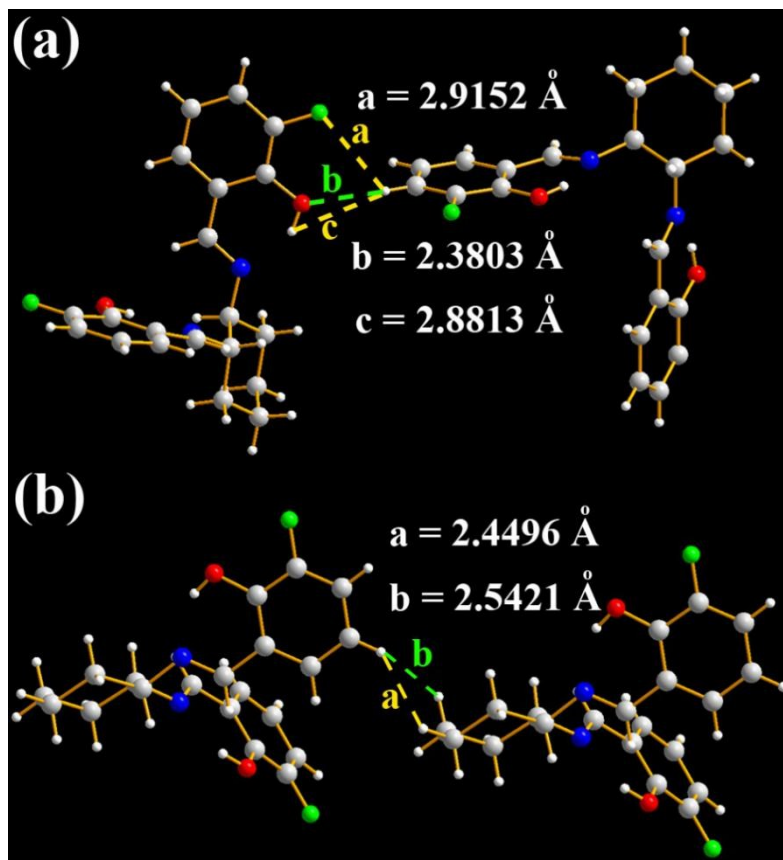

**Fig. S12** X-ray single crystal structures and packing of **3-F-(S,S)Cy** molecules.

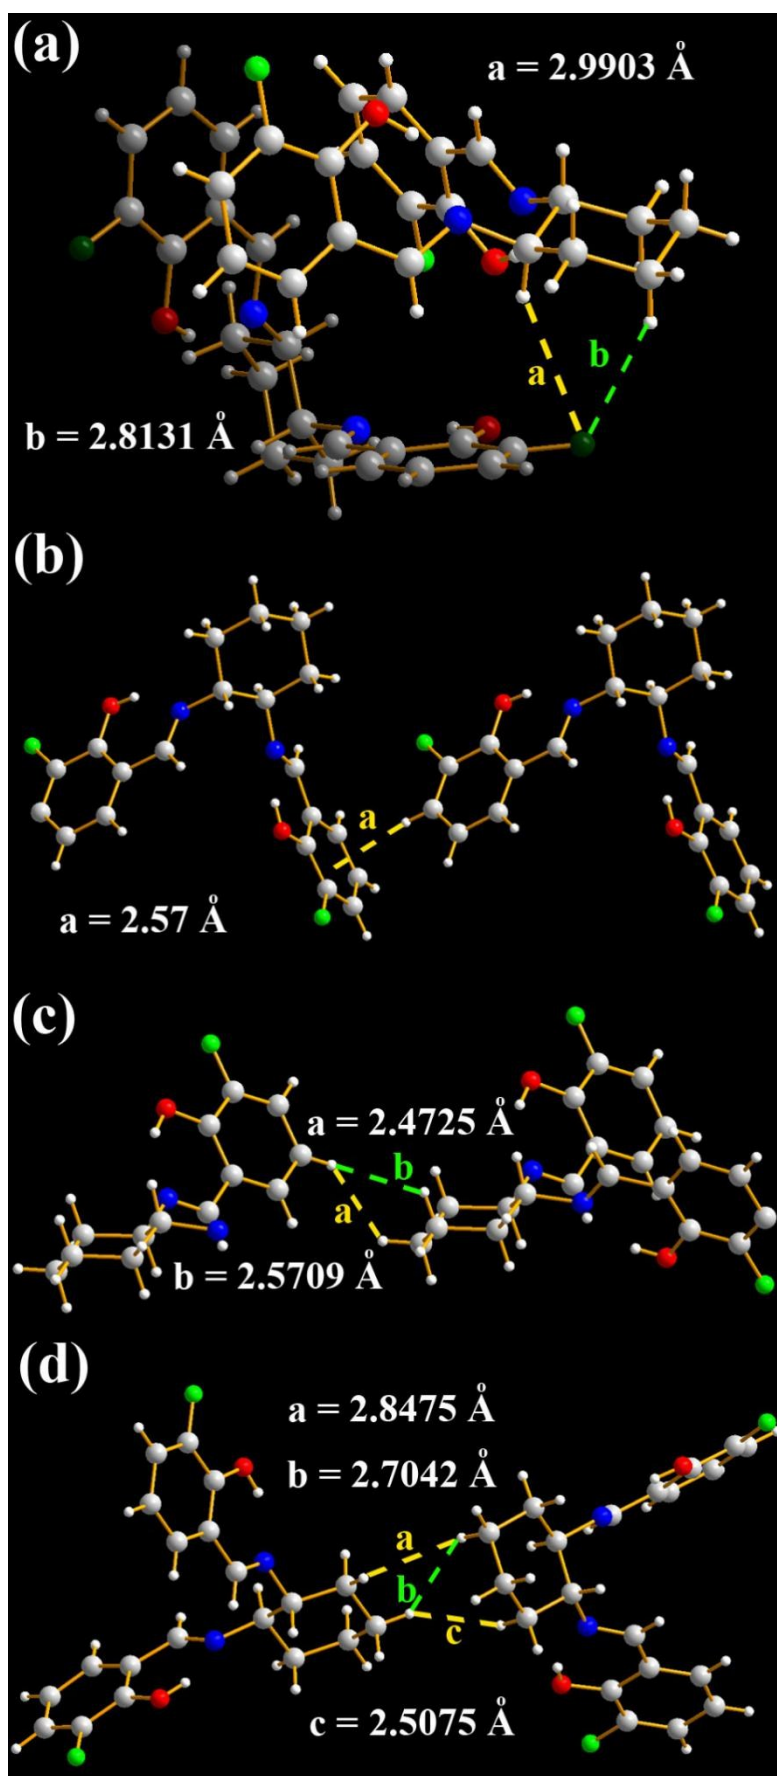

Fig. S13 X-ray single crystal structures and packing of 3-F-(R,R)Cy molecules.

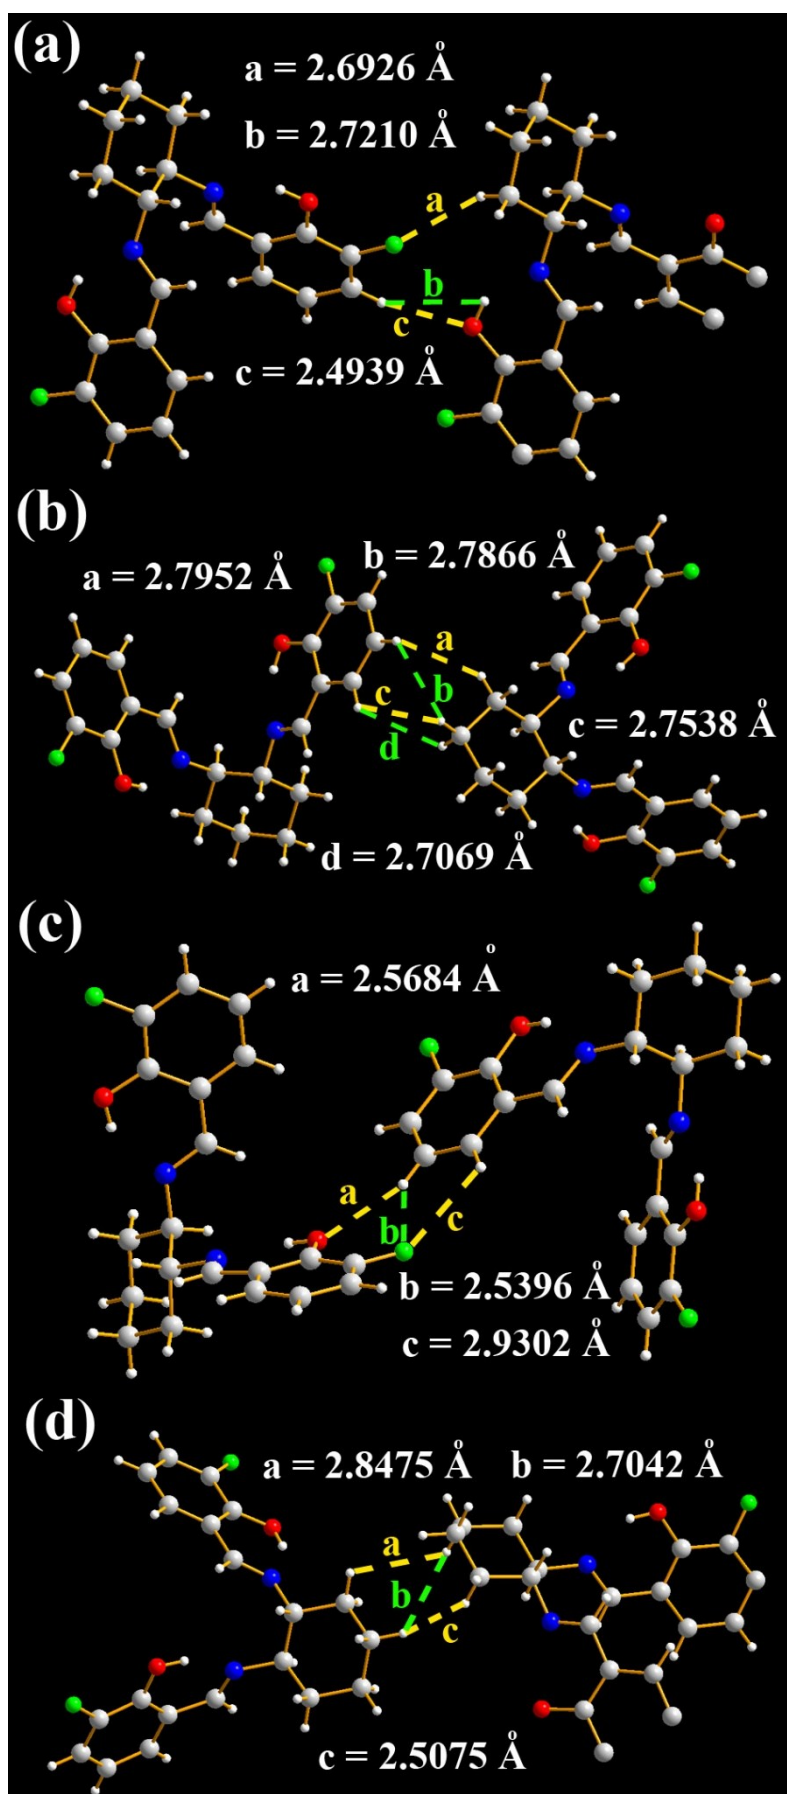

Fig. S14 X-ray single crystal structures and packing of 3-F-(R,R)Cy molecules.

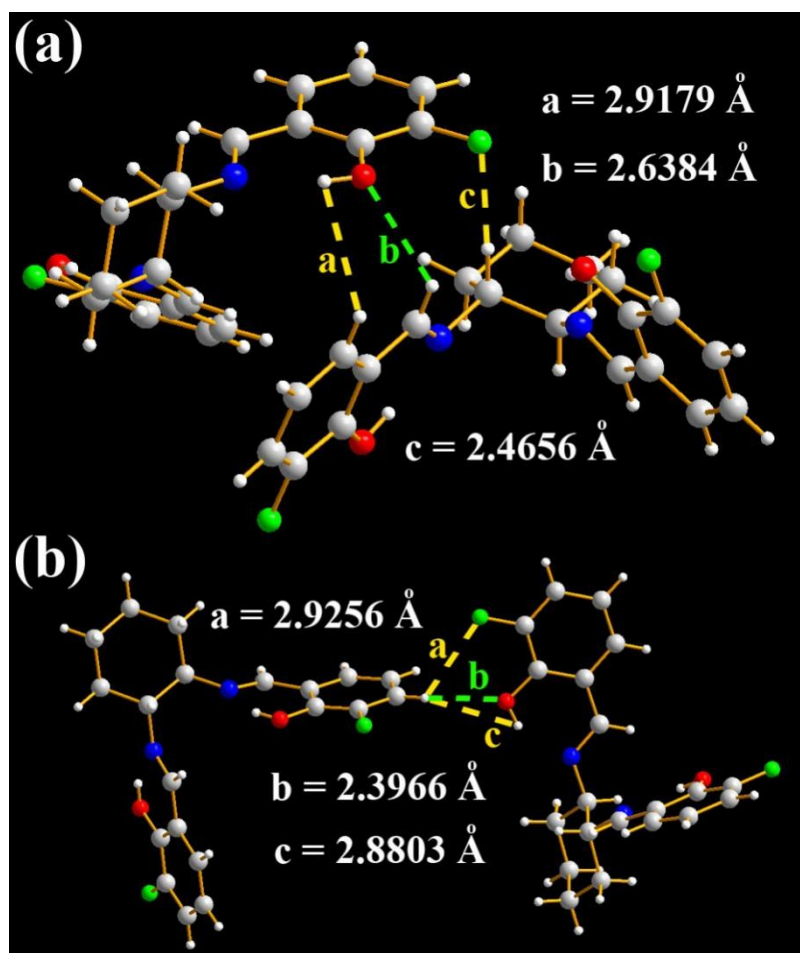

Fig. S15 X-ray single crystal structures and packing of 3-F-(R,R)Cy molecules.

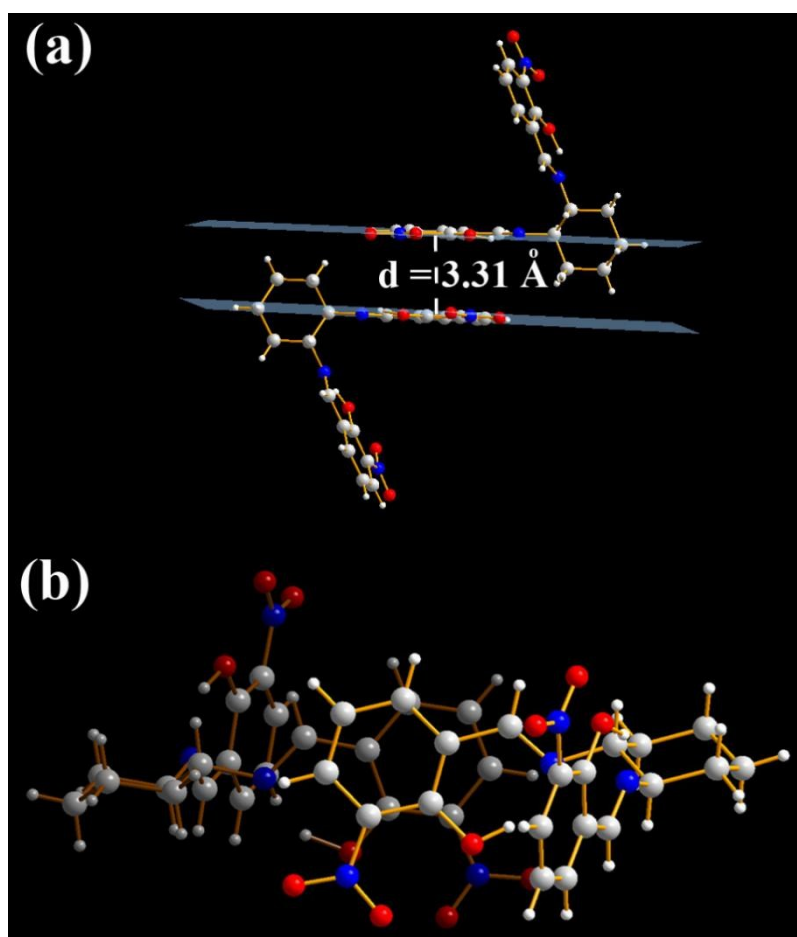

**Fig. S16** X-ray single crystal structures and packing of 3-NO<sub>2</sub>-(R,R)Cy molecules (a: side view of face-to-face  $\pi$ - $\pi$  interactions; b: top view of face-to-face  $\pi$ - $\pi$  interactions; solvent molecules are omitted).



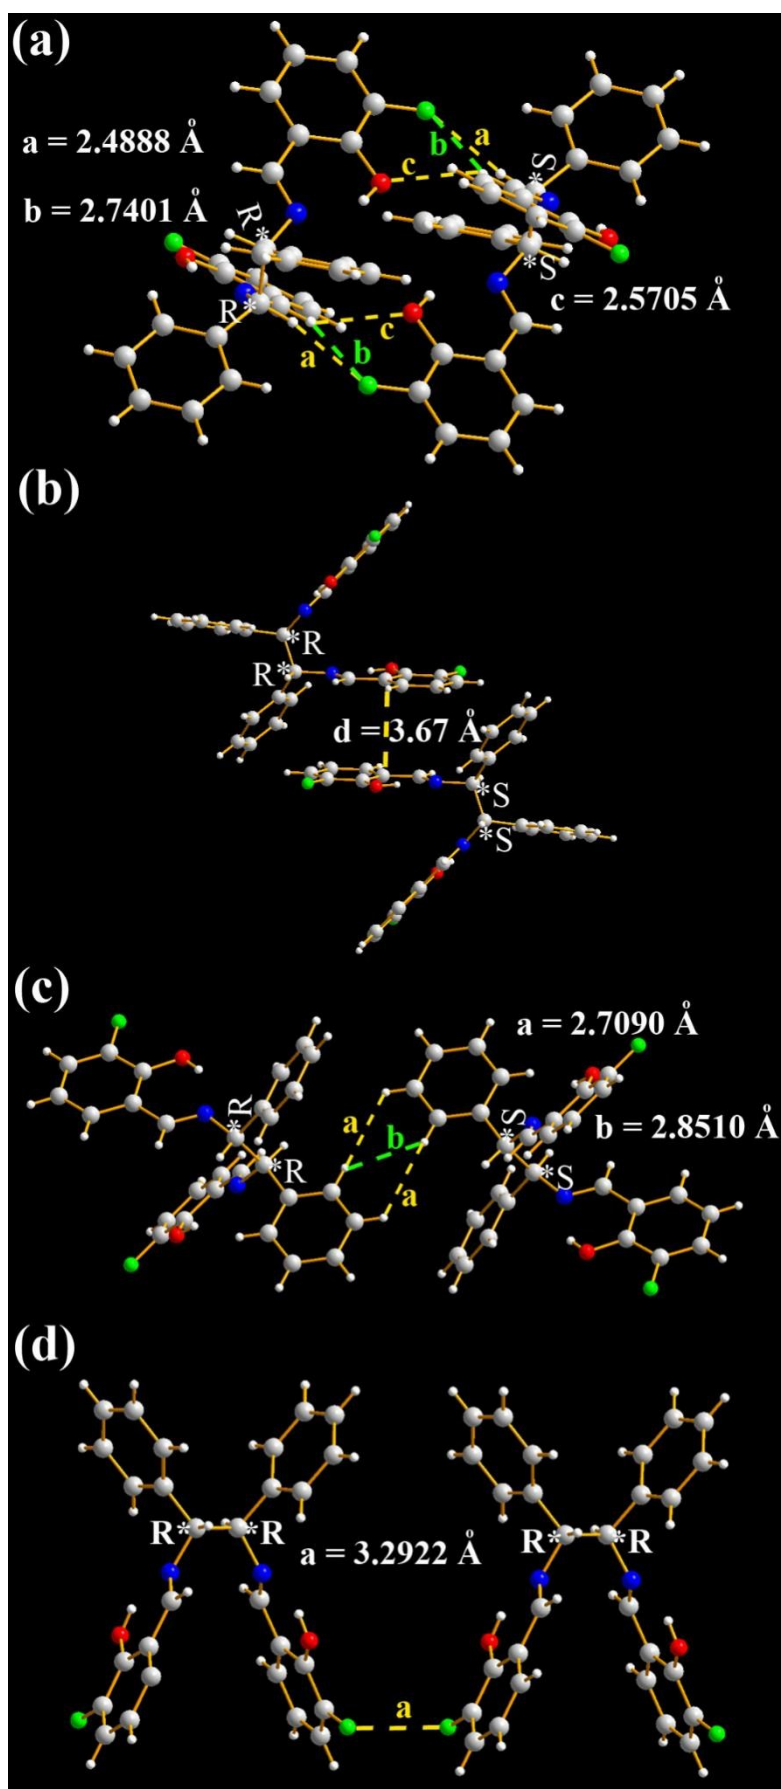

Fig. S17 X-ray single crystal structures and packing of 3-F-diPh molecules.

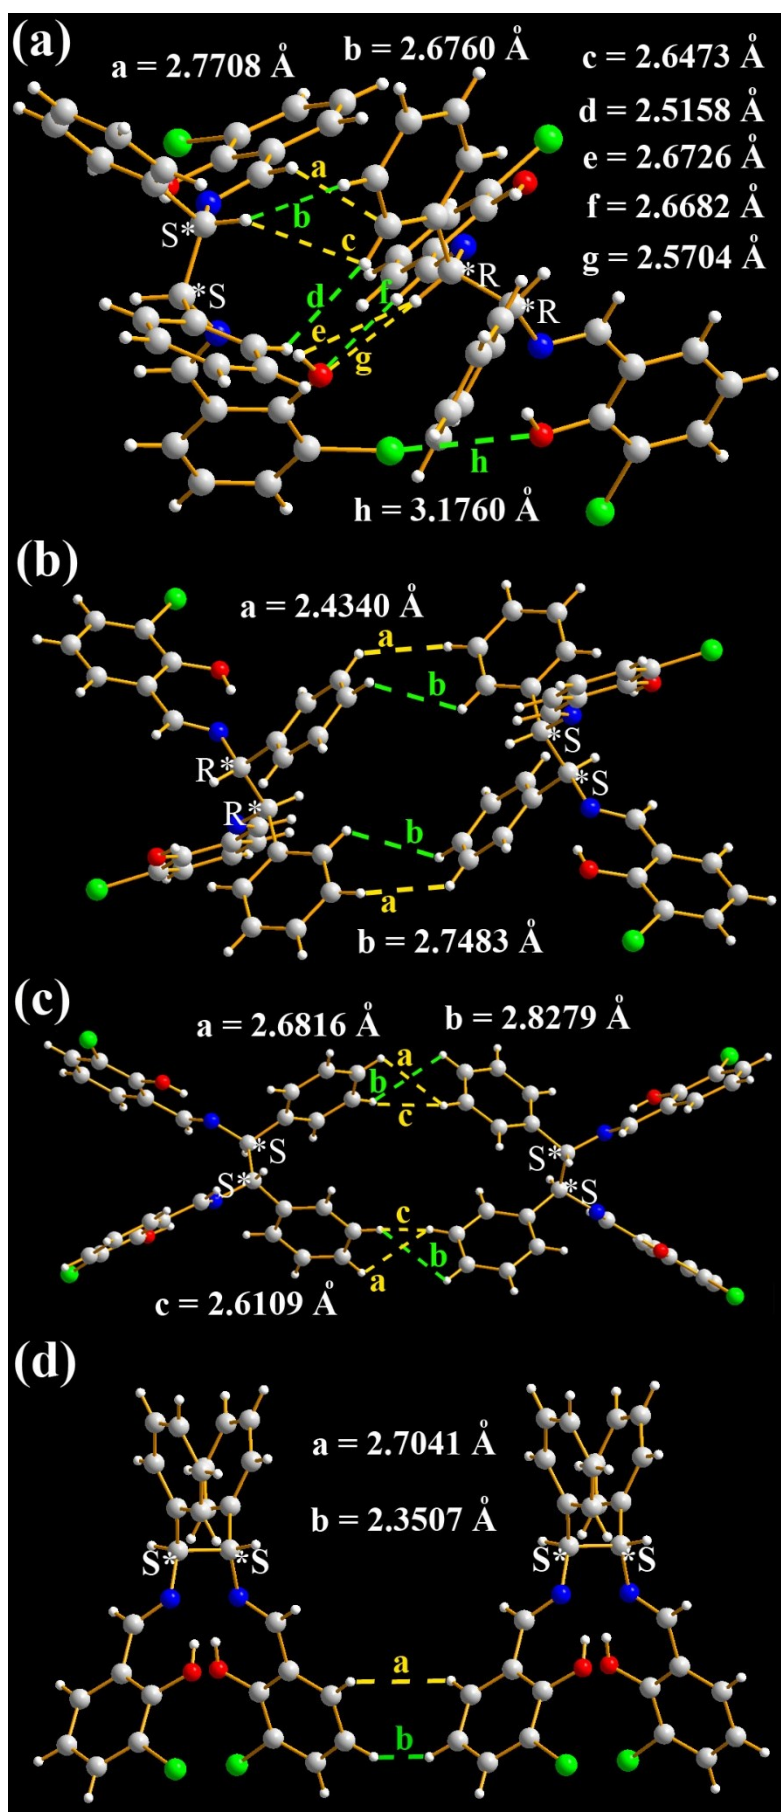

Fig. S18 X-ray single crystal structures and packing of 3-Cl-diPh molecules.

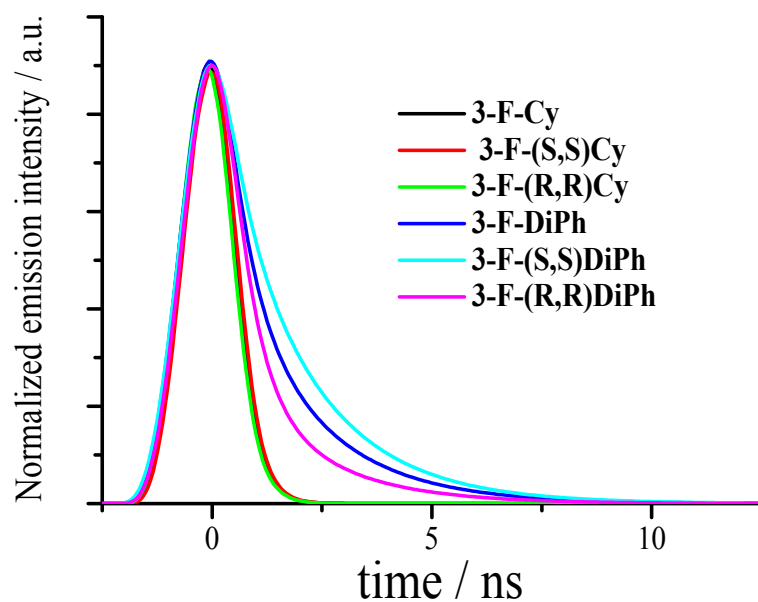

**Fig. S19** Time-resolved emission decay spectra (excited at 370 nm) of powder samples.

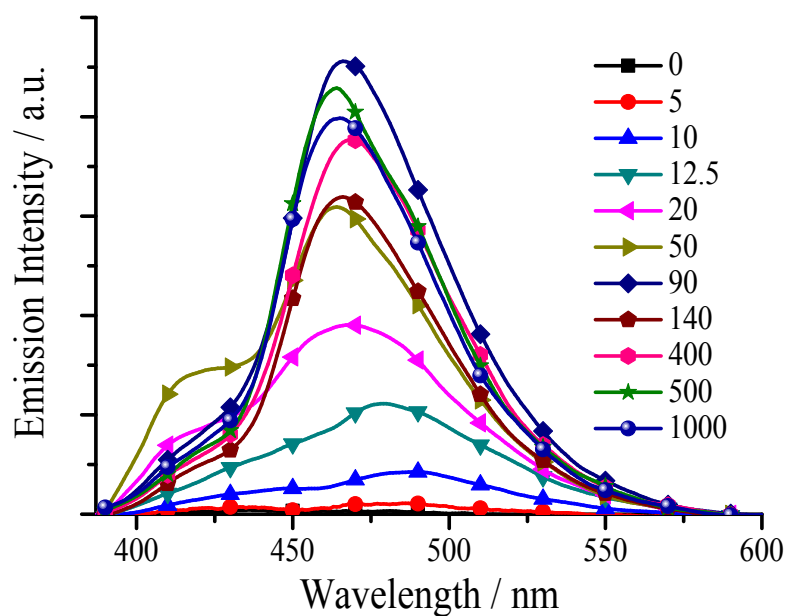

**Fig. S20** Emission spectra of 3,5-Cl-diPh ( $1.0 \times 10^{-5}$  mol dm<sup>-3</sup> in DMSO, excited at 380 nm) upon the addition of different equivalents of OH<sup>-</sup>.

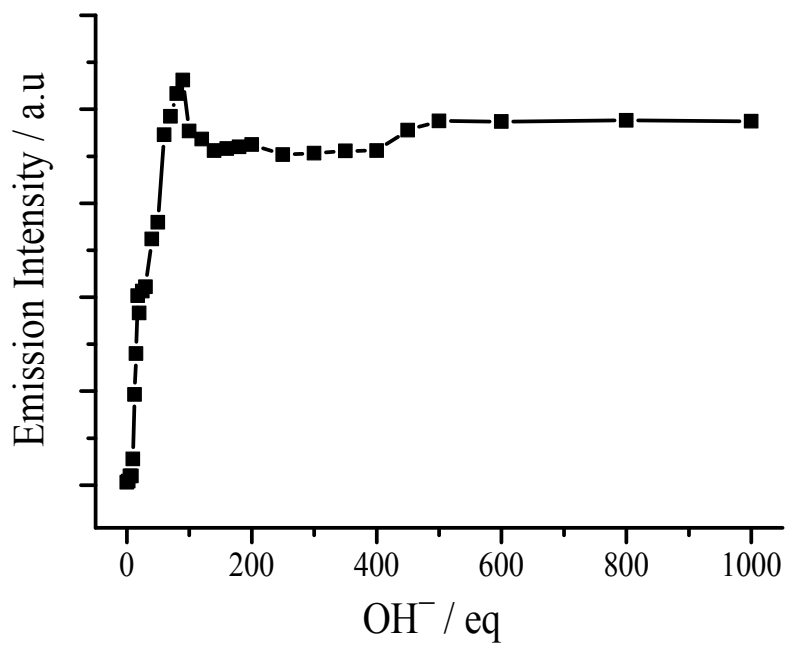

**Fig. S21** Plot of emission intensity of **3,5-Cl-diPh** ( $1.0 \times 10^{-5}$  mol dm<sup>-3</sup> in DMSO) at 470 nm (excited at 380 nm) as a function of OH<sup>-</sup> concentration.

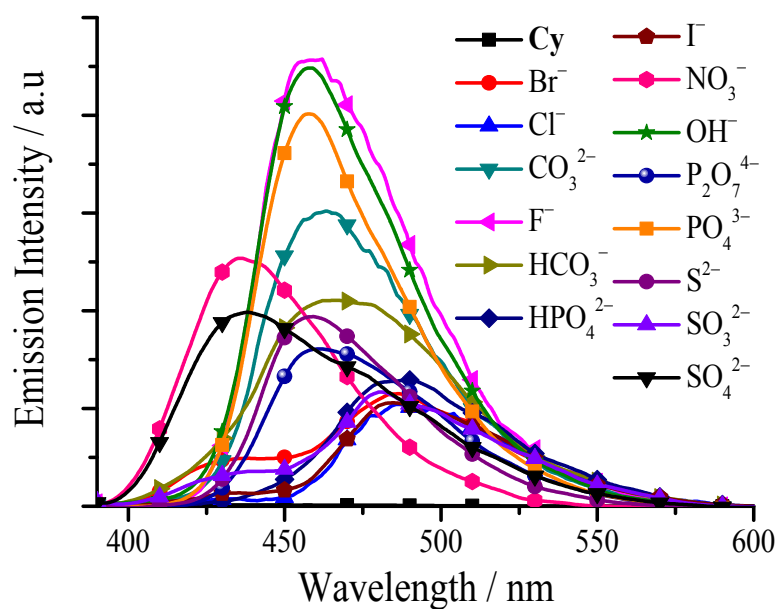

**Fig. S22** Emission spectra of Cy ( $1.0 \times 10^{-5}$  mol dm<sup>-3</sup> in DMSO, excited at 380 nm) upon the addition of 100 equivalent of different anions.

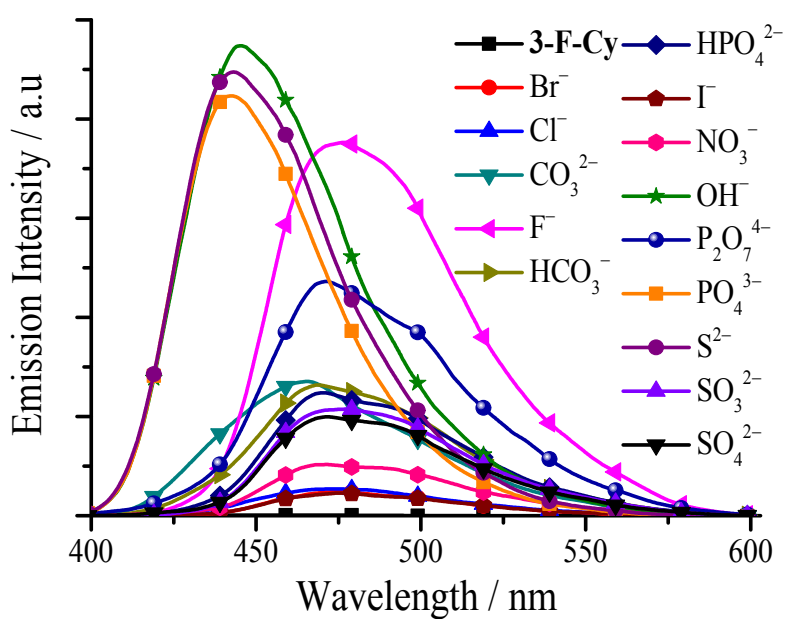

**Fig. S23** Emission spectra of 3-F-Cy ( $1.0 \times 10^{-5}$  mol dm<sup>-3</sup> in DMSO, excited at 380 nm) upon the addition of 100 equivalent of different anions.

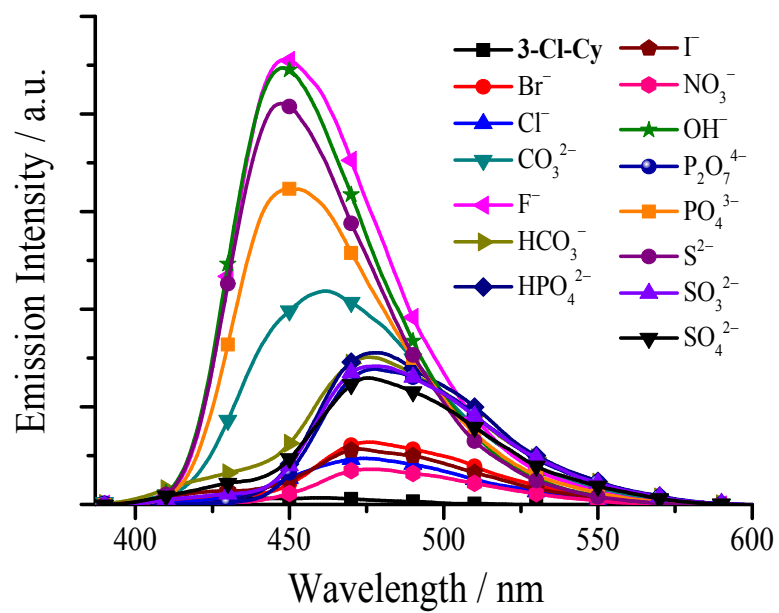

**Fig. S24** Emission spectra of 3-Cl-Cy ( $1.0 \times 10^{-5}$  mol dm<sup>-3</sup> in DMSO, excited at 380 nm) upon the addition of 100 equivalent of different anions.

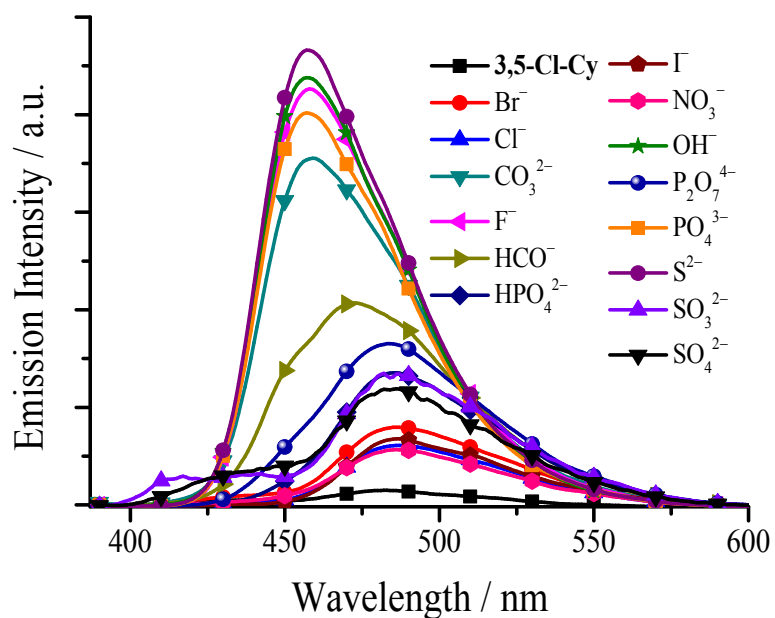

**Fig. S25** Emission spectra of 3,5-Cl-Cy ( $1.0 \times 10^{-5}$  mol dm<sup>-3</sup> in DMSO, excited at 380 nm) upon the addition of 100 equivalent of different anions.

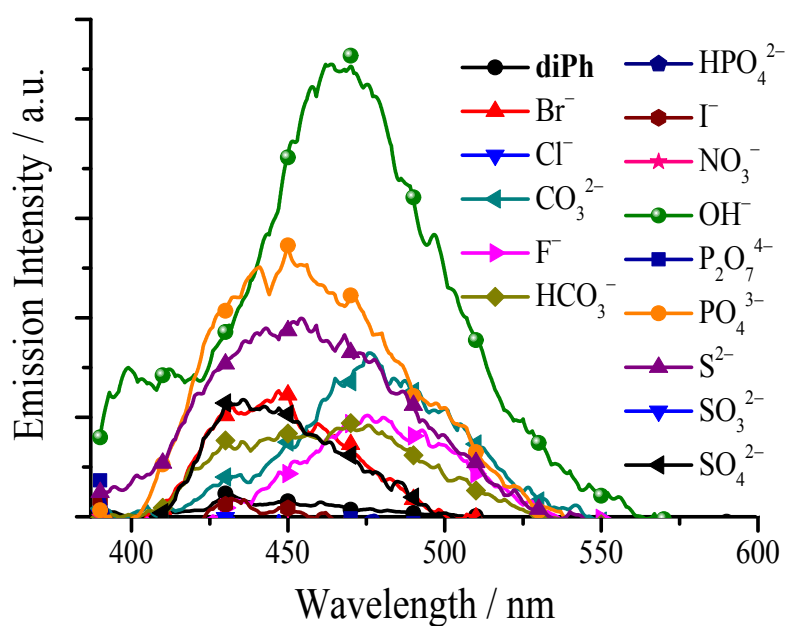

**Fig. S26** Emission spectra of diPh ( $1.0 \times 10^{-5}$  mol dm<sup>-3</sup> in DMSO, excited at 380 nm) upon the addition of 100 equivalent of different anions.

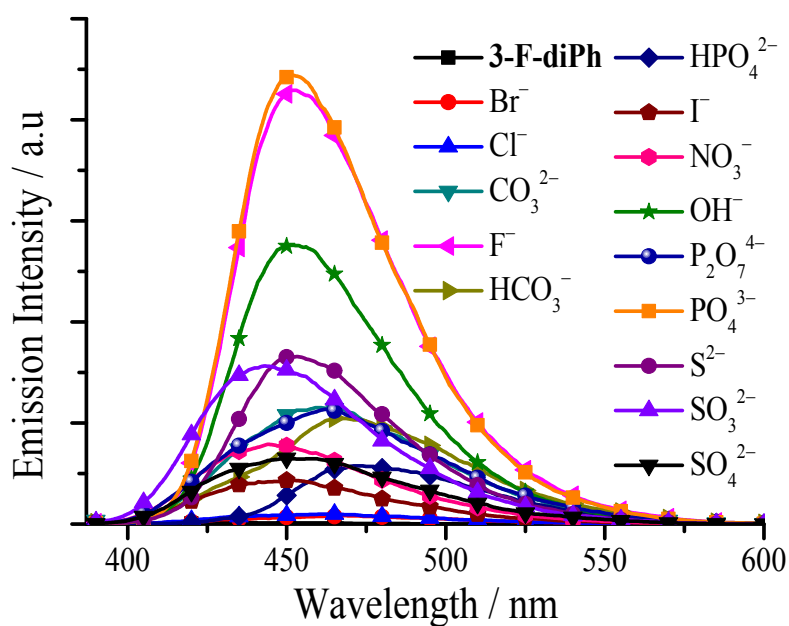

**Fig. S27** Emission spectra of **3-F-diPh** ( $1.0 \times 10^{-5}$  mol dm<sup>-3</sup> in DMSO, excited at 380 nm) upon the addition of 100 equivalent of different anions.

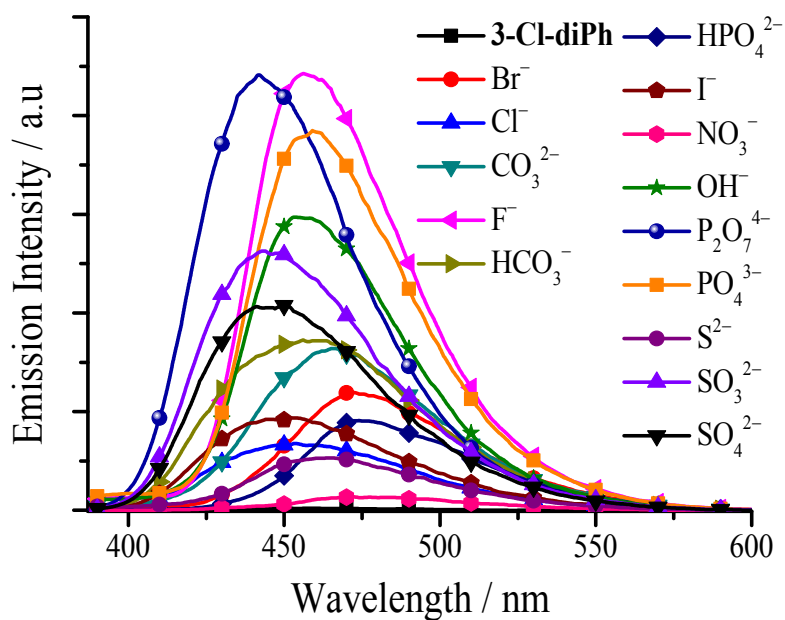

**Fig. S28** Emission spectra of **3-Cl-diPh** ( $1.0 \times 10^{-5}$  mol dm<sup>-3</sup> in DMSO, excited at 380 nm) upon the addition of 100 equivalent of different anions.



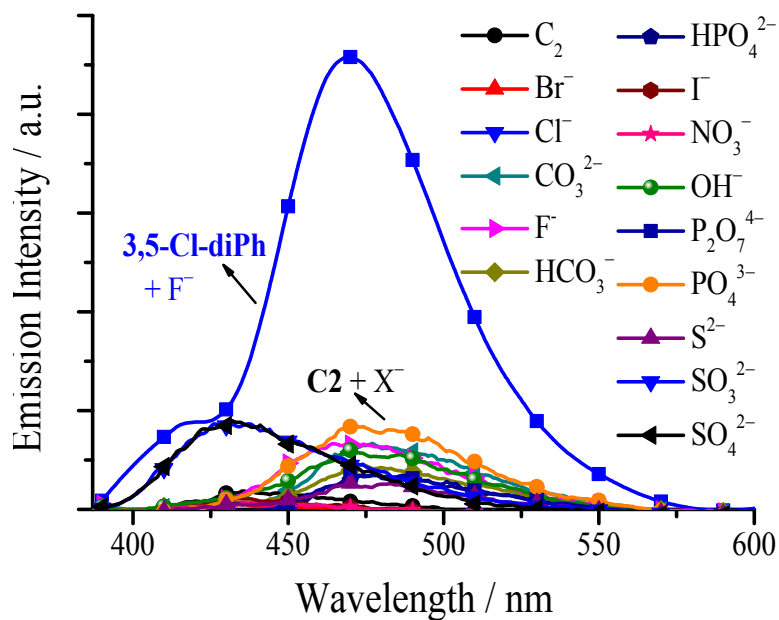

**Fig. 29** Emission spectra of  $C_2$  and **3,5-Cl-diPh** ( $1.0 \times 10^{-5}$  mol  $dm^{-3}$  in DMSO, excited at 380 nm) upon the addition of 100 equivalent of different anions and upon the addition of 100 equivalent of  $F^-$ , respectively.

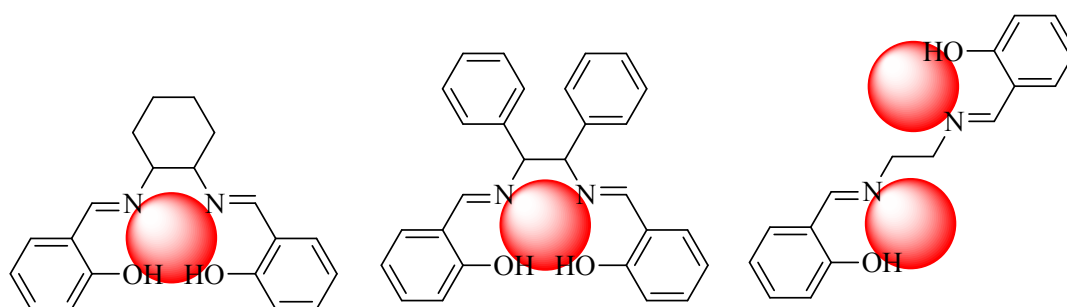

**Fig. 30** Possible interaction mechanism between the dye and anion.

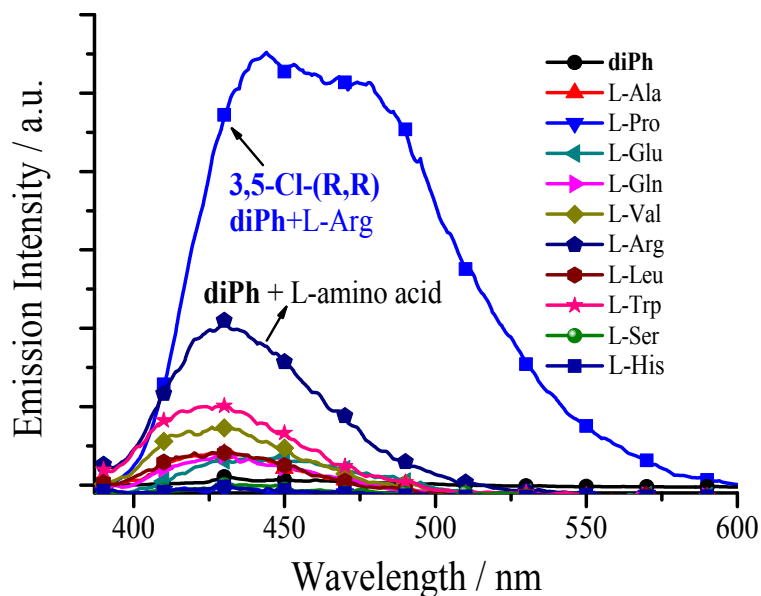

**Fig. 31** Emission spectra of **diPh** and **3,5-Cl-(R,R)diPh** ( $1.0 \times 10^{-5}$  mol  $\text{dm}^{-3}$  in DMSO, excited at 380 nm) upon the addition of 100 equivalent of different L- amino acid and upon the addition of 100 equivalent of L-Arg, respectively

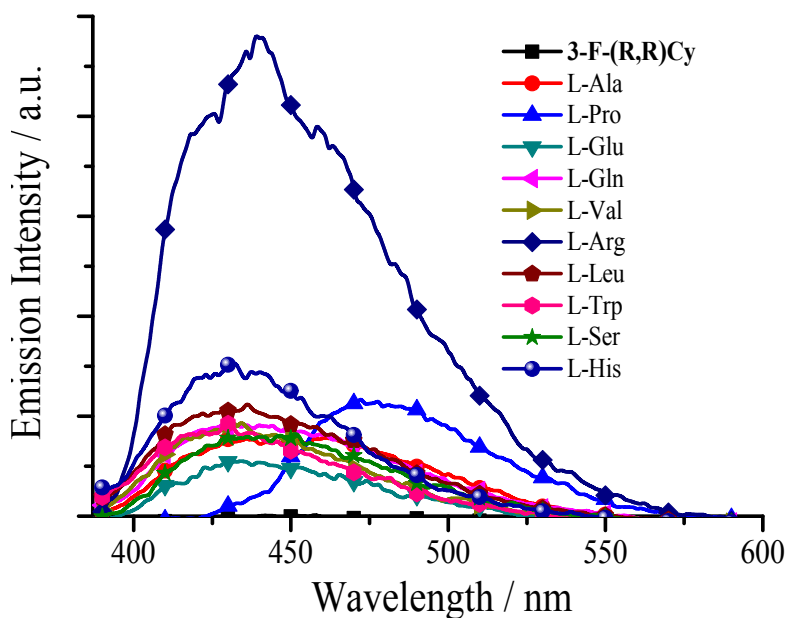

**Fig. S32** Emission spectra of **3-F-(R,R)Cy** ( $1.0 \times 10^{-5}$  mol  $\text{dm}^{-3}$  in DMSO, excited at 380 nm) upon the addition of different 100 equivalent of L-amino acid.

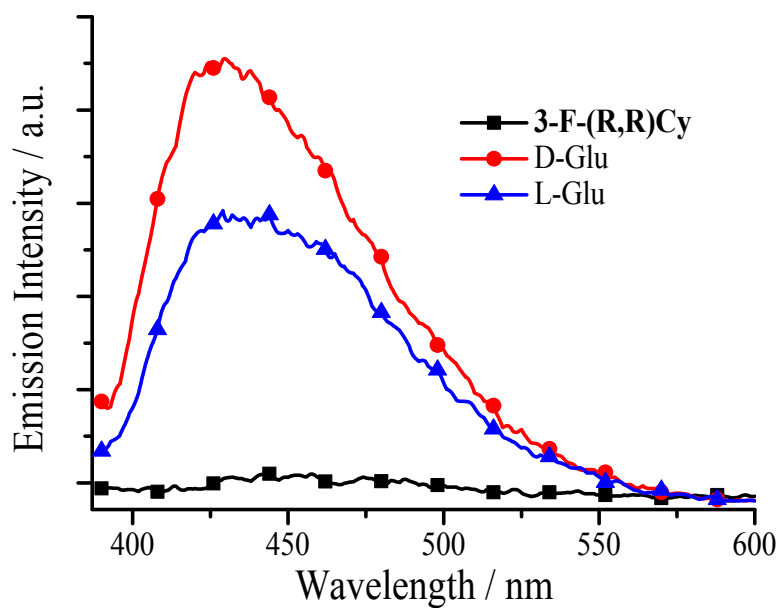

**Fig. S33** Emission spectra of **3-F-(R,R)Cy** ( $1.0 \times 10^{-5}$  mol dm $^{-3}$  in DMSO, excited at 380 nm) upon the addition of 100 equivalent of L- or D-Glu.

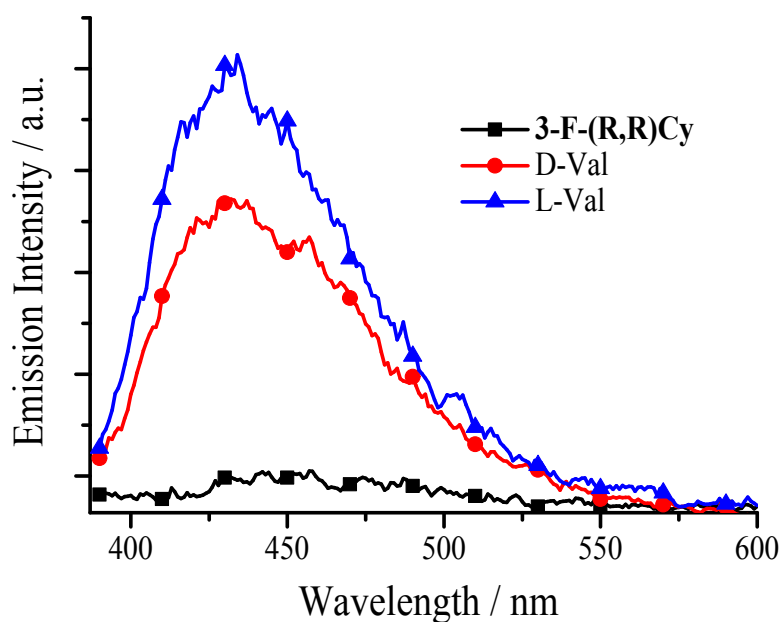

**Fig. S34** Emission spectra of **3-F-(R,R)Cy** ( $1.0 \times 10^{-5}$  mol dm $^{-3}$  in DMSO, excited at 380 nm) upon the addition of 100 equivalent of L- or D-Val.

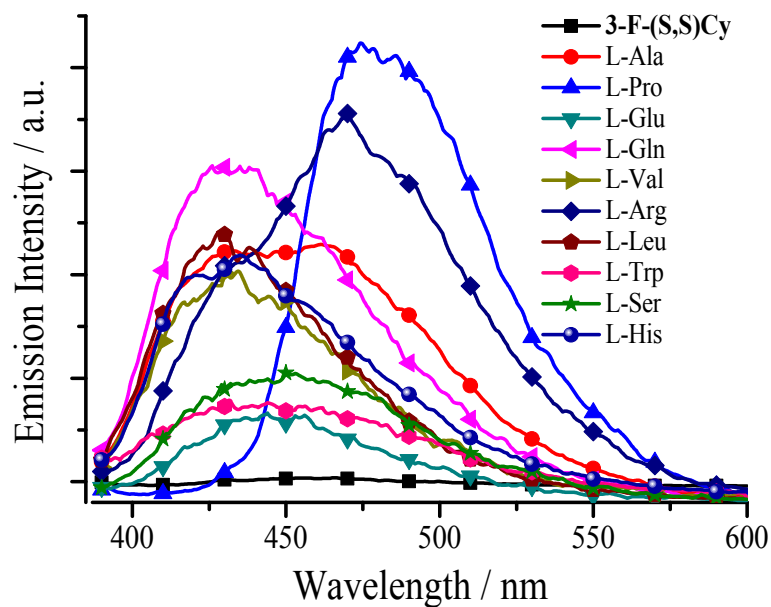

**Fig. S35** Emission spectra of 3-F-(S,S)Cy ( $1.0 \times 10^{-5}$  mol dm<sup>-3</sup> in DMSO, excited at 380 nm) upon the addition of different 100 equivalent of L-amino acid.

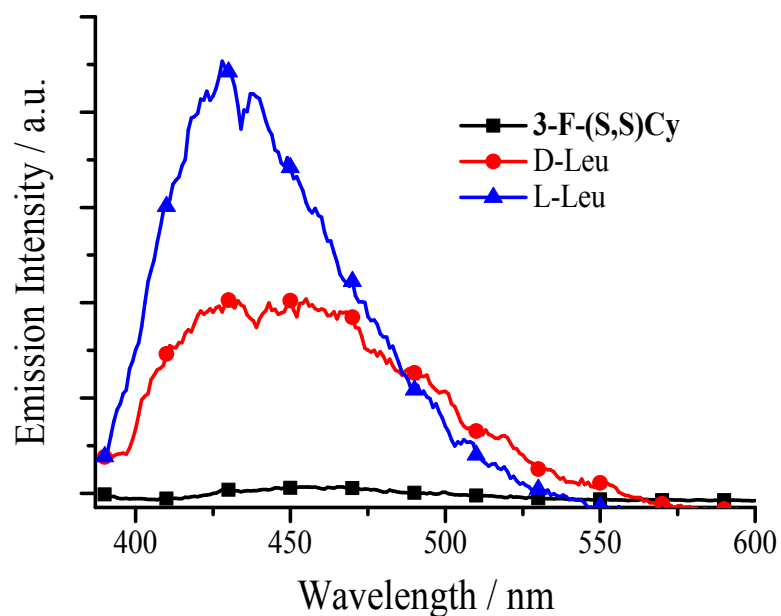

**Fig. S36** Emission spectra of 3-F-(S,S)Cy ( $1.0 \times 10^{-5}$  mol dm<sup>-3</sup> in DMSO, excited at 380 nm) upon the addition of 100 equivalent of L-Leu or D-Leu.

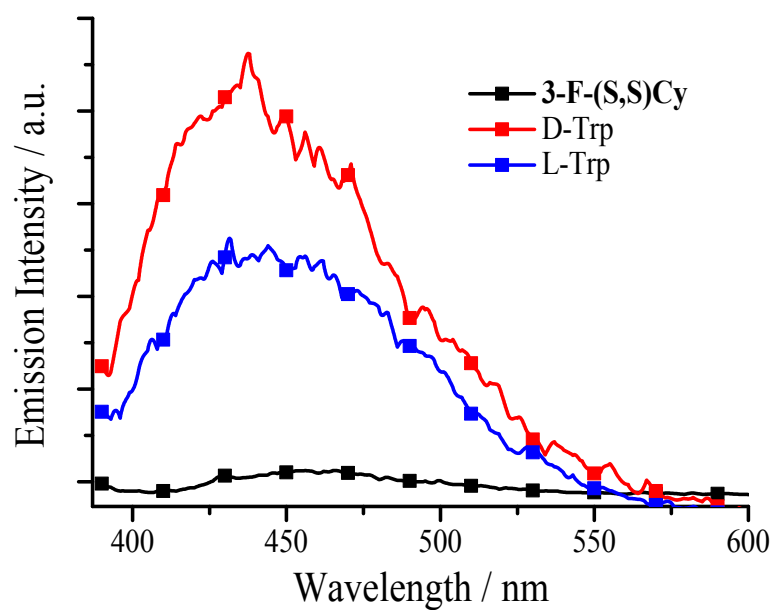

**Fig. S37** Emission spectra of **3-F-(S,S)Cy** ( $1.0 \times 10^{-5}$  mol dm $^{-3}$  in DMSO, excited at 380 nm) upon the addition of 100 equivalent of L- or D-Trp.

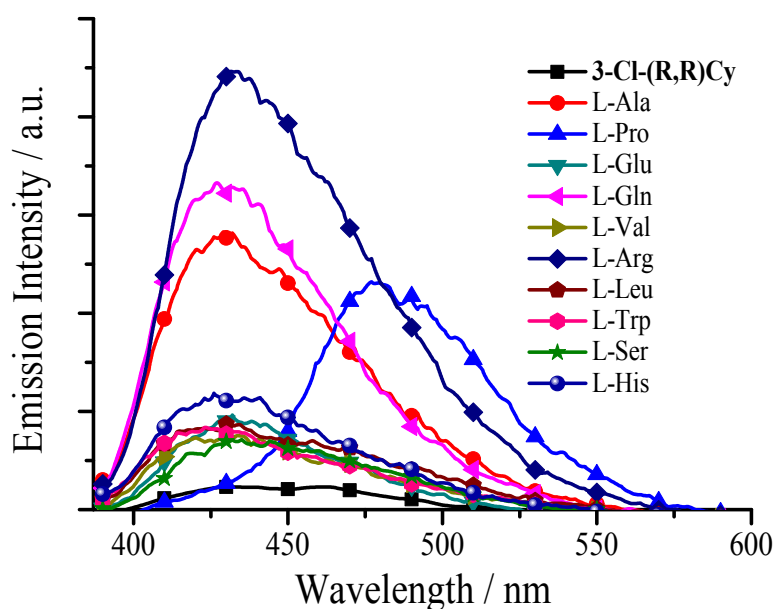

**Fig. S38** Emission spectra of **3-Cl-(R,R)Cy** ( $1.0 \times 10^{-5}$  mol dm $^{-3}$  in DMSO, excited at 380 nm) upon the addition of 100 equivalent of L-amino acid.

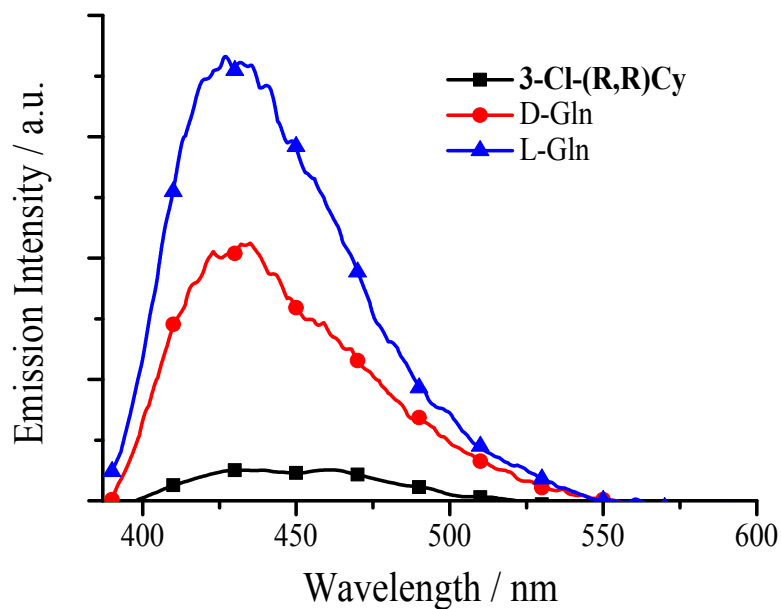

**Fig. S39** Emission spectra of **3-Cl-(R,R)Cy** ( $1.0 \times 10^{-5}$  mol dm<sup>-3</sup> in DMSO, excited at 380 nm) upon the addition of 100 equivalent of L- or D-Trp.

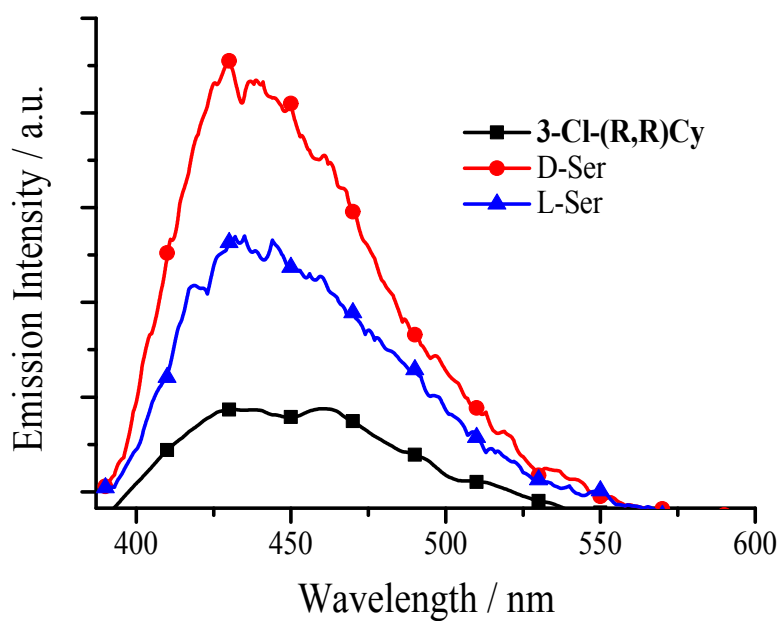

**Fig. S40** Emission spectra of **3-Cl-(R,R)Cy** ( $1.0 \times 10^{-5}$  mol dm<sup>-3</sup> in DMSO, excited at 380 nm) upon the addition of 100 equivalent of L- or D-Ser.

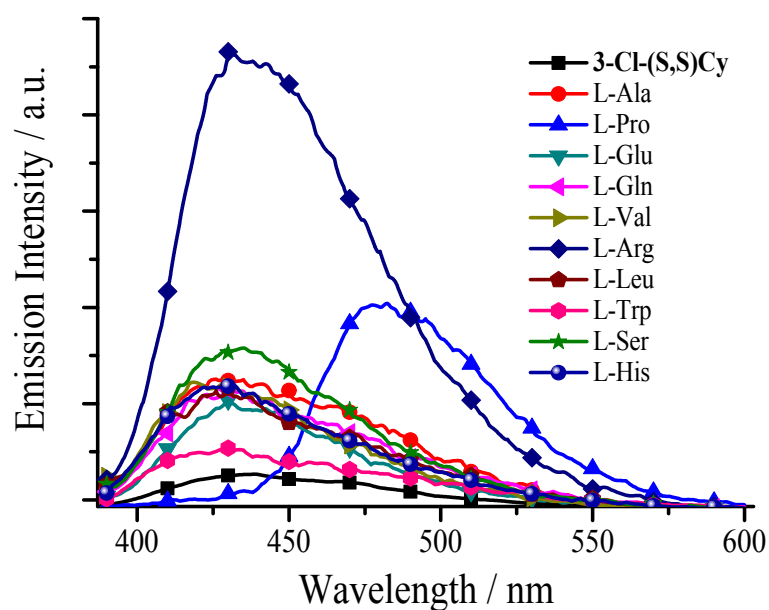

**Fig. S41** Emission spectra of 3-Cl-(S,S)Cy ( $1.0 \times 10^{-5}$  mol dm<sup>-3</sup> in DMSO, excited at 380 nm) upon the addition of 100 equivalent of L-amino acid.

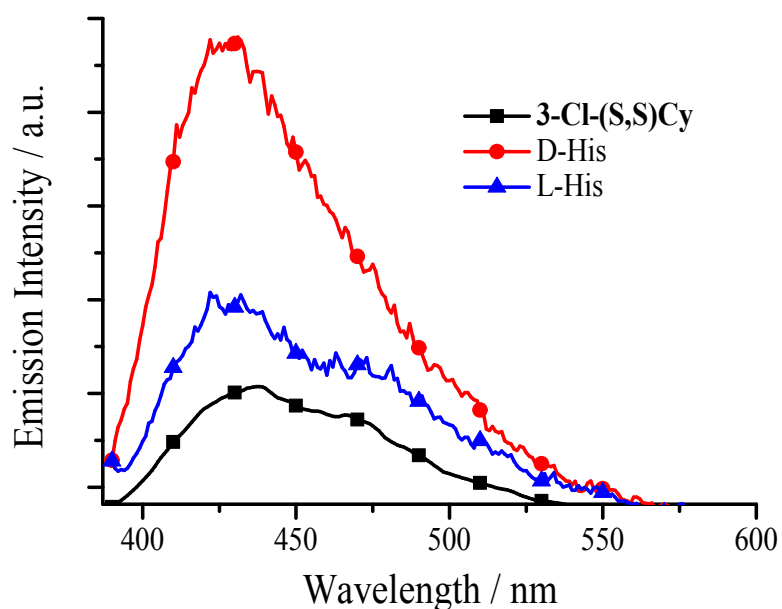

**Fig. S42** Emission spectra of 3-Cl-(S,S)Cy ( $1.0 \times 10^{-5}$  mol dm<sup>-3</sup> in DMSO, excited at 380 nm) upon the addition of 100 equivalent of L- or D-His.

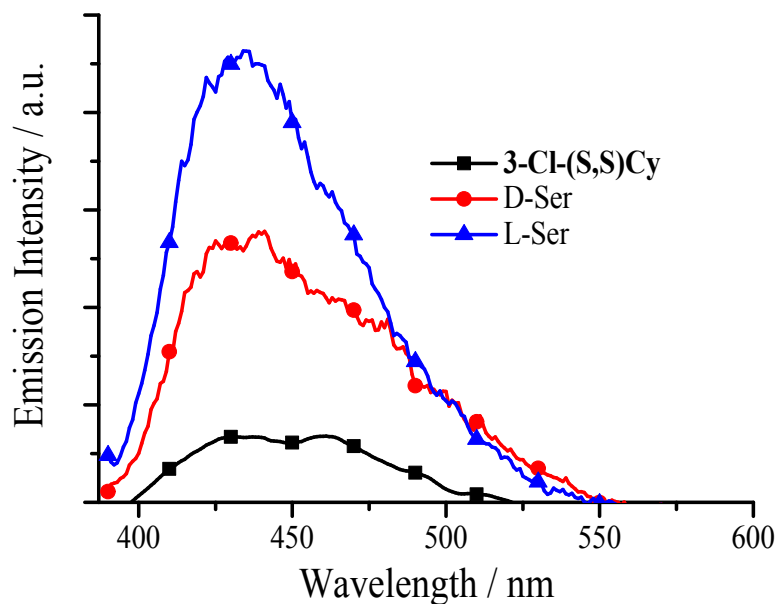

**Fig. S43** Emission spectra of 3-Cl-(S,S)Cy ( $1.0 \times 10^{-5}$  mol dm $^{-3}$  in DMSO, excited at 380 nm) upon the addition of 100 equivalent of L- or D-Ser.

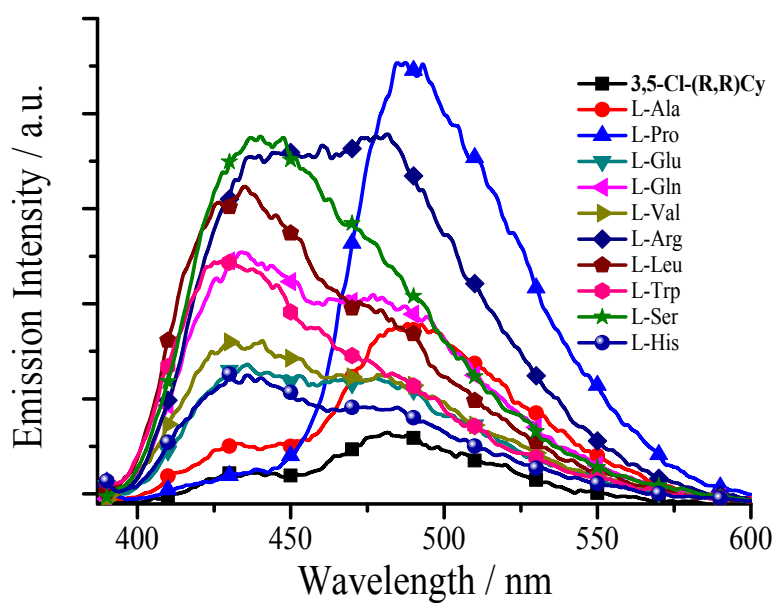

**Fig. S44** Emission spectra of 3,5-Cl-(R,R)Cy ( $1.0 \times 10^{-5}$  mol dm $^{-3}$  in DMSO, excited at 380 nm) upon the addition of 100 equivalent of L-amino acid.



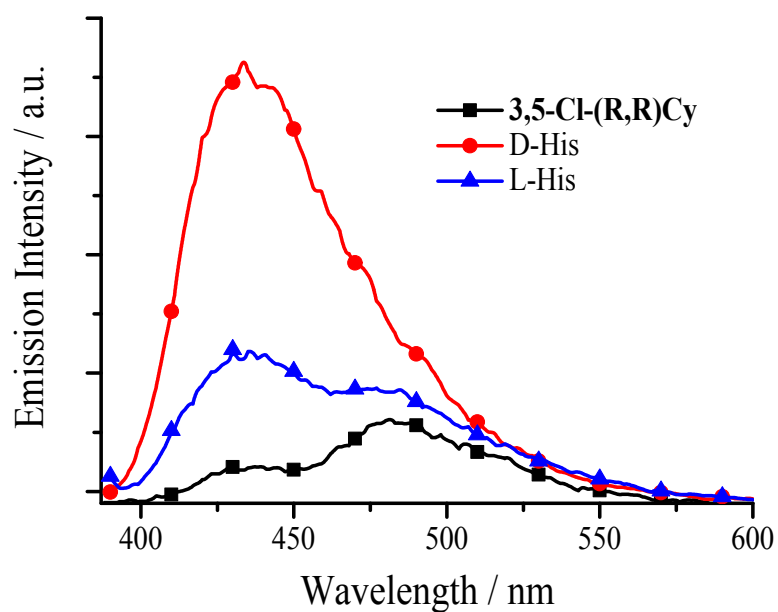

**Fig. S45** Emission spectra of **3,5-CI-(R,R)Cy** ( $1.0 \times 10^{-5} \text{ mol dm}^{-3}$  in DMSO, excited at 380 nm) upon the addition of 100 equivalent of L- or D-His.

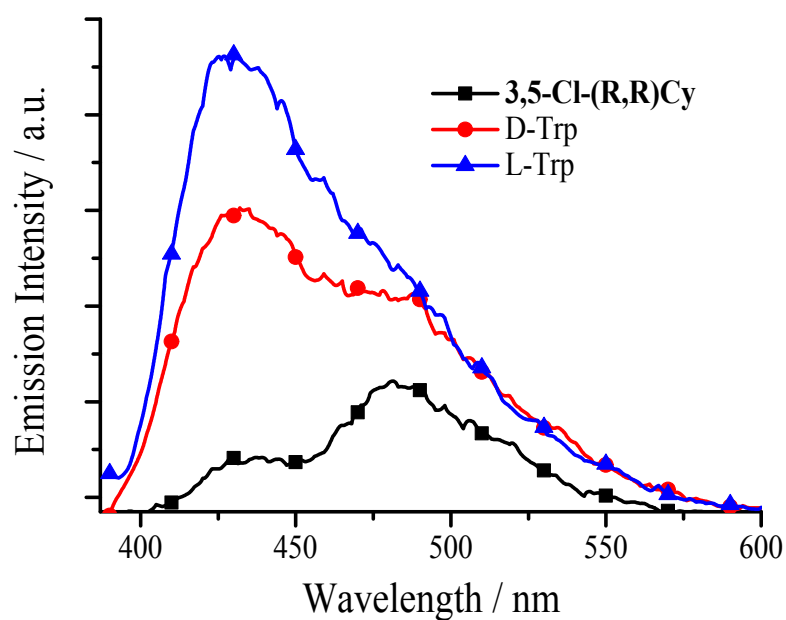

**Fig. S46** Emission spectra of **3,5-CI-(R,R)Cy** ( $1.0 \times 10^{-5} \text{ mol dm}^{-3}$  in DMSO, excited at 380 nm) upon the addition of 100 equivalent of L- or D-Trp.

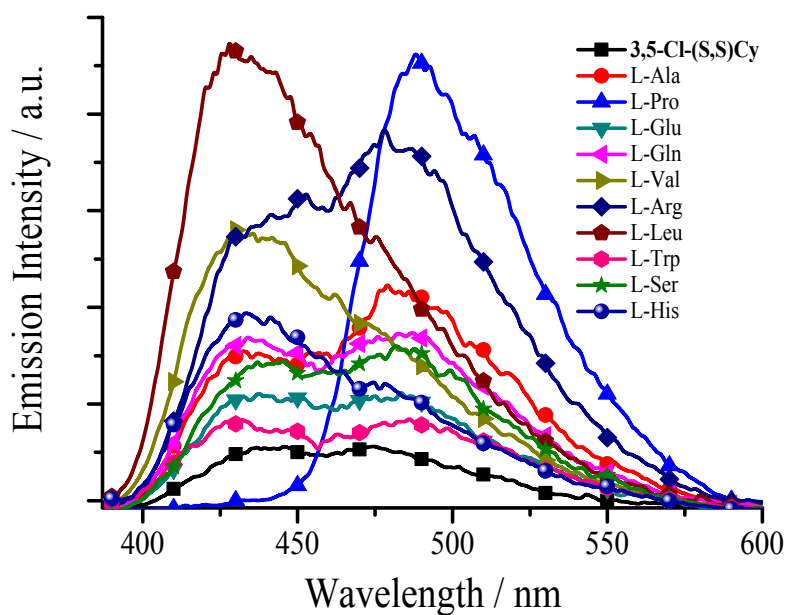

**Fig. S47** Emission spectra of 3,5-CI-(S,S)Cy ( $1.0 \times 10^{-5}$  mol dm<sup>-3</sup> in DMSO, excited at 380 nm) upon the addition of 100 equivalent of L-amino acid.

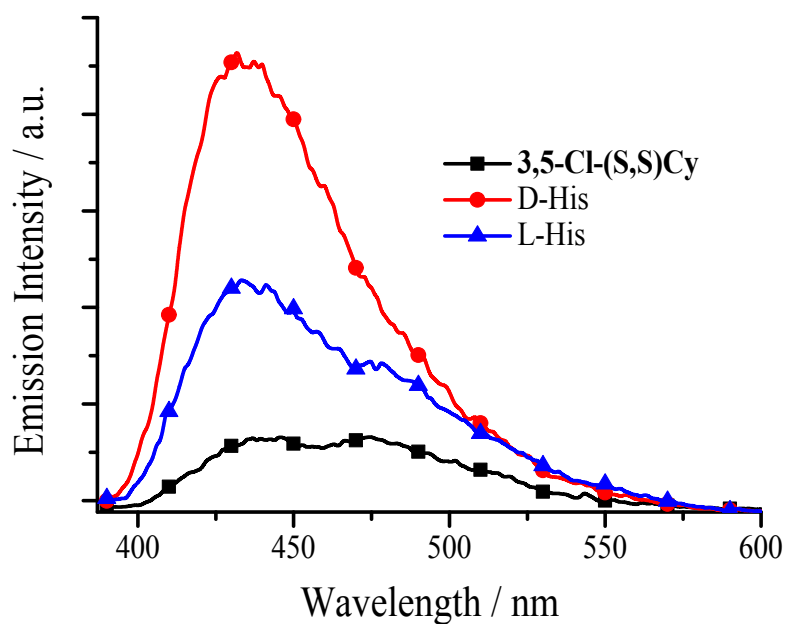

**Fig. S48** Emission spectra of 3,5-CI-(S,S)Cy ( $1.0 \times 10^{-5}$  mol dm<sup>-3</sup> in DMSO, excited at 380 nm) upon the addition of 100 equivalent of L- or D-His.

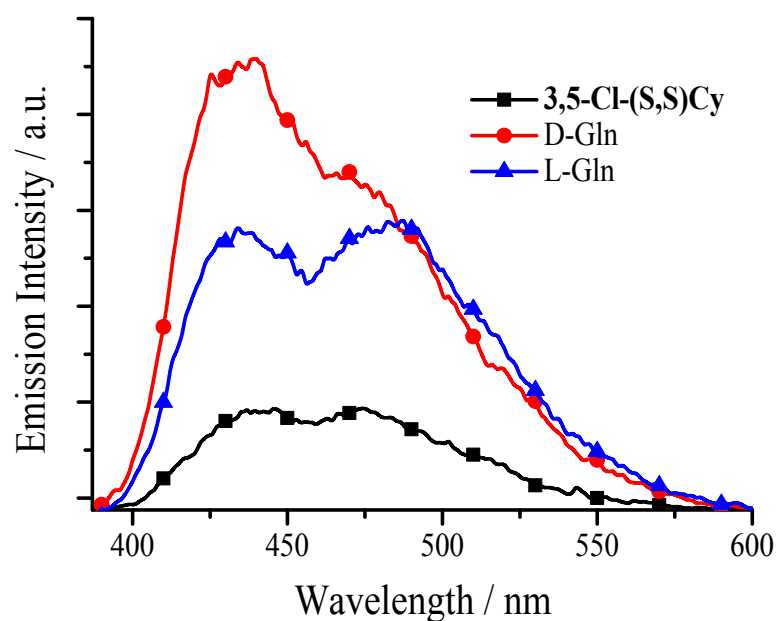

**Fig. S49** Emission spectra of **3,5-Cl-(S,S)Cy** ( $1.0 \times 10^{-5}$  mol dm<sup>-3</sup> in DMSO, excited at 380 nm) upon the addition of 100 equivalent of L- or D-Gln.

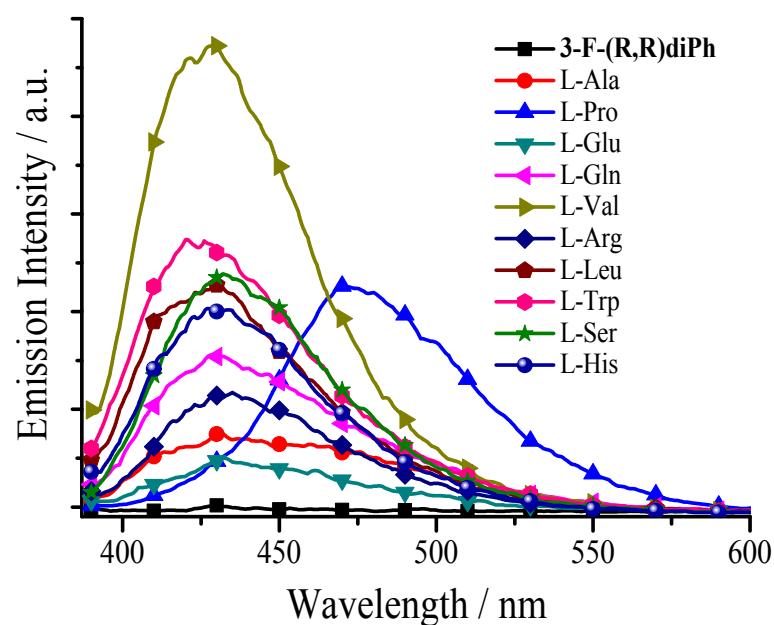

**Fig. S50** Emission spectra of **3-F-(R,R)diPh** ( $1.0 \times 10^{-5}$  mol dm<sup>-3</sup> in DMSO, excited at 380 nm) upon the addition of 100 equivalent of L-amino acid.

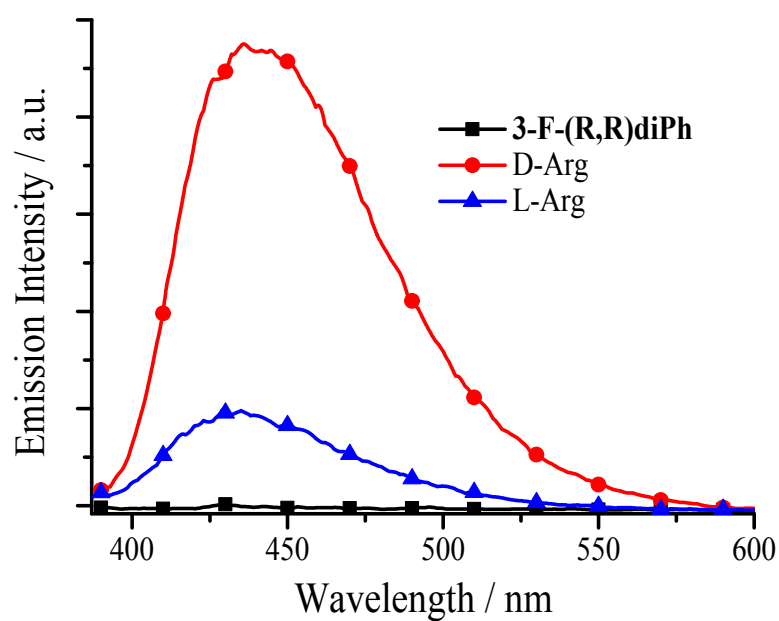

**Fig. S51** Emission spectra of 3-F-(R,R)Cy ( $1.0 \times 10^{-5}$  mol dm $^{-3}$  in DMSO, excited at 380 nm) upon the addition of 100 equivalent of L- or D-Arg.

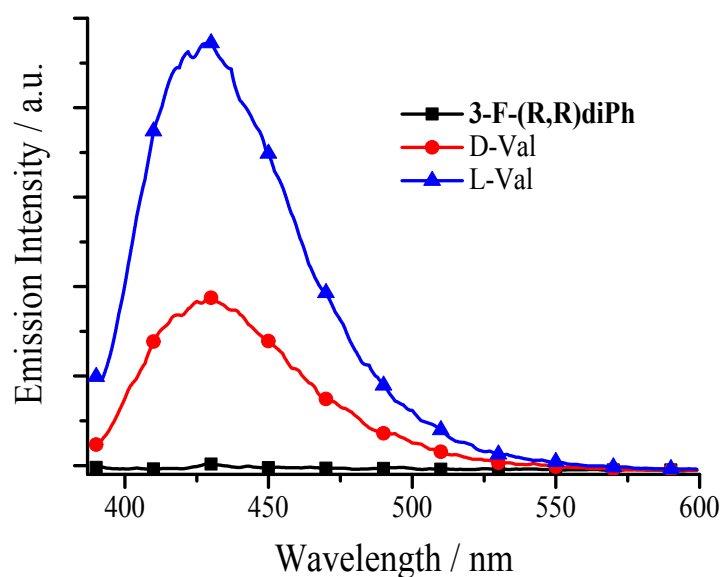

**Fig. S52** Emission spectra of 3-F-(R,R)Cy ( $1.0 \times 10^{-5}$  mol dm $^{-3}$  in DMSO, excited at 380 nm) upon the addition of 100 equivalent of L- or D-Val.

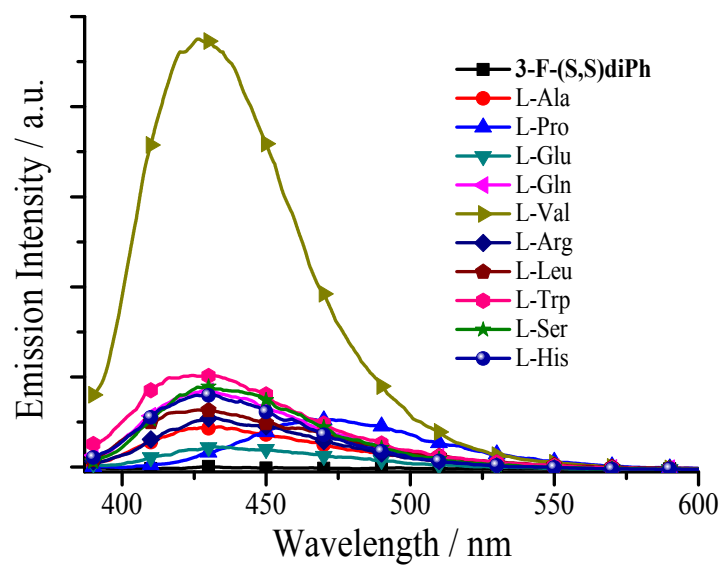

**Fig. S53** Emission spectra of **3-F-(S,S)diPh** ( $1.0 \times 10^{-5}$  mol dm<sup>-3</sup> in DMSO, excited at 380 nm) upon the addition of 100 equivalent of L-amino acid.

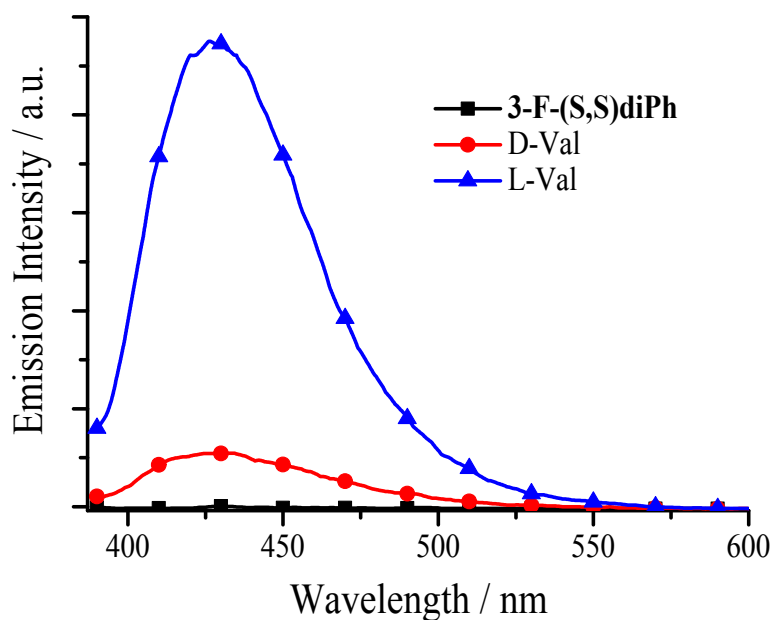

**Fig. S54** Emission spectra of **3-F-(S,S)Cy** ( $1.0 \times 10^{-5}$  mol dm<sup>-3</sup> in DMSO, excited at 380 nm) upon the addition of 100 equivalent of L- or D-Val.

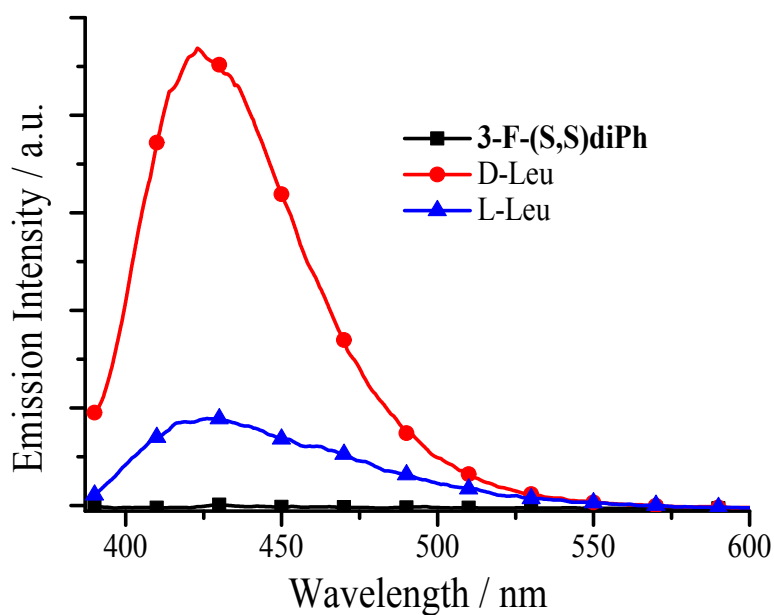

**Fig. S55** Emission spectra of 3-F-(S,S)Cy ( $1.0 \times 10^{-5}$  mol dm<sup>-3</sup> in DMSO, excited at 380 nm) upon the addition of 100 equivalent of L- or D-Leu.

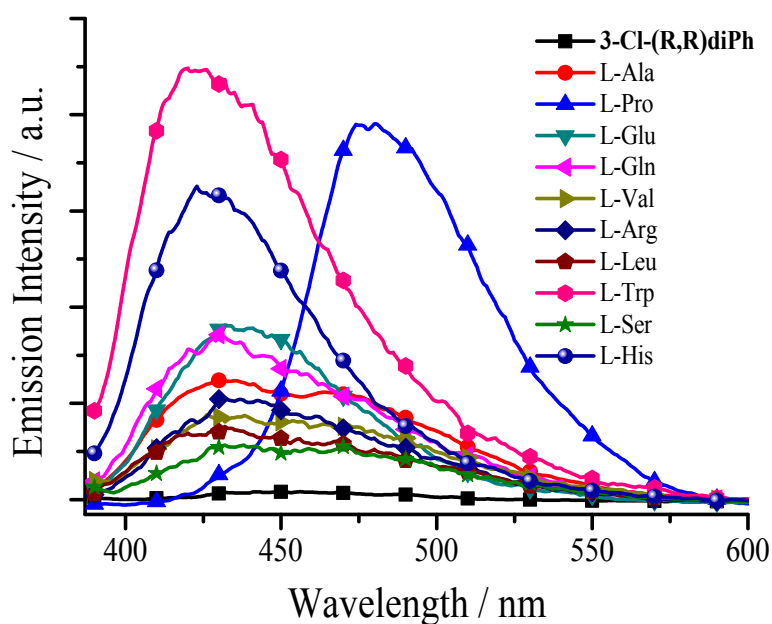

**Fig. S56** Emission spectra of 3-Cl-(R,R)diPh ( $1.0 \times 10^{-5}$  mol dm<sup>-3</sup> in DMSO, excited at 380 nm) upon the addition of different 100 equivalent of L-amino acid.

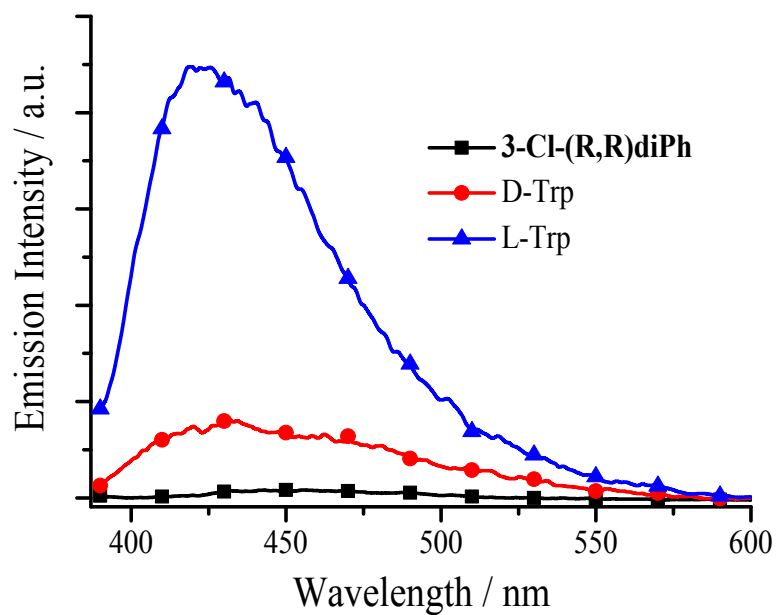

**Fig. S57** Emission spectra of **3-Cl-(R,R)diPh** ( $1.0 \times 10^{-5}$  mol dm<sup>-3</sup> in DMSO, excited at 380 nm) upon the addition of 100 equivalent of L- or D-Trp.

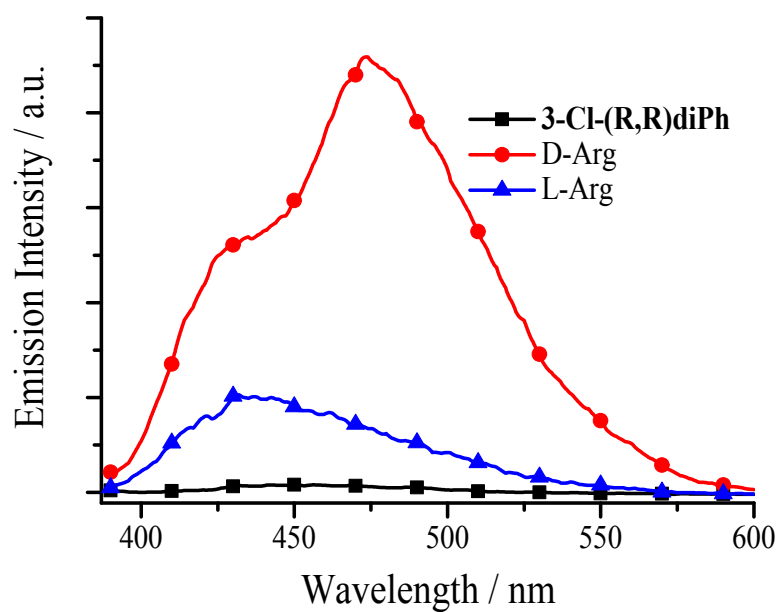

**Fig. S58** Emission spectra of **3-Cl-(R,R)diPh** ( $1.0 \times 10^{-5}$  mol dm<sup>-3</sup> in DMSO, excited at 380 nm) upon the addition of 100 equivalent of L- or D-Arg.

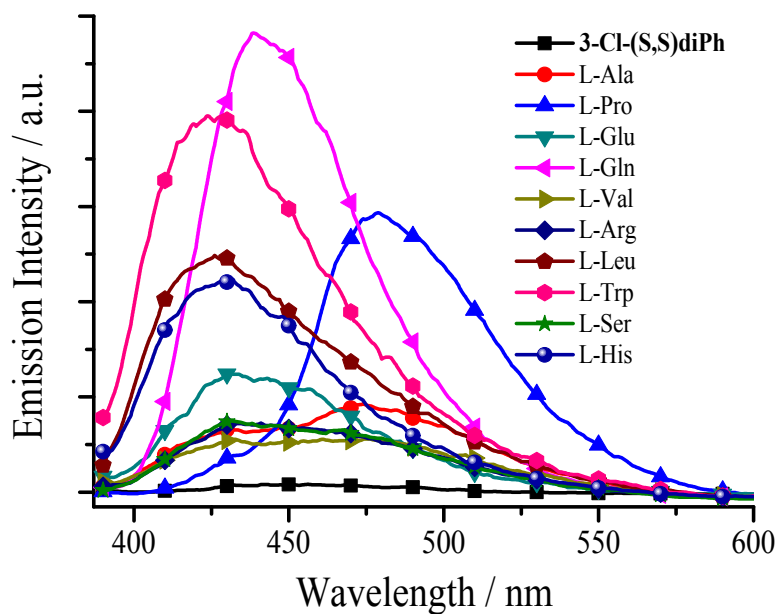

**Fig. S59** Emission spectra of 3-Cl-(S,S)diPh ( $1.0 \times 10^{-5}$  mol dm<sup>-3</sup> in DMSO, excited at 380 nm) upon the addition of different 100 equivalent of L-amino acid.

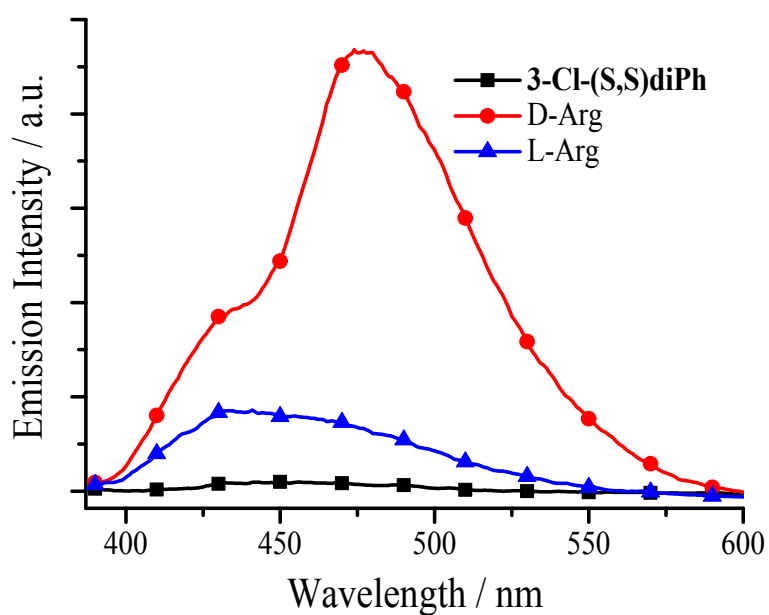

**Fig. S60** Emission spectra of 3-Cl-(S,S)diPh ( $1.0 \times 10^{-5}$  mol dm<sup>-3</sup> in DMSO, excited at 380 nm) upon the addition of 100 equivalent of L- or D-Arg.



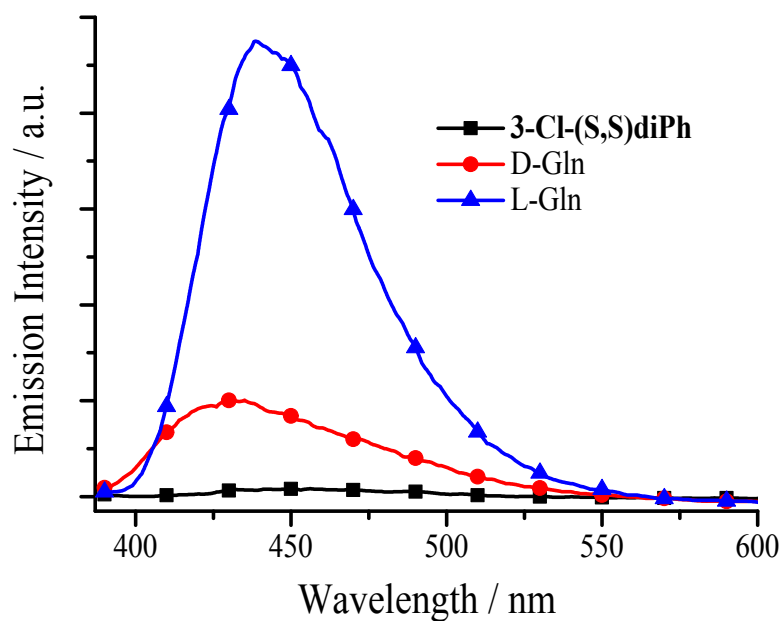

**Fig. S61** Emission spectra of **3-Cl-(S,S)diPh** ( $1.0 \times 10^{-5}$  mol dm<sup>-3</sup> in DMSO, excited at 380 nm) upon the addition of 100 equivalent of L- or D-Gln.

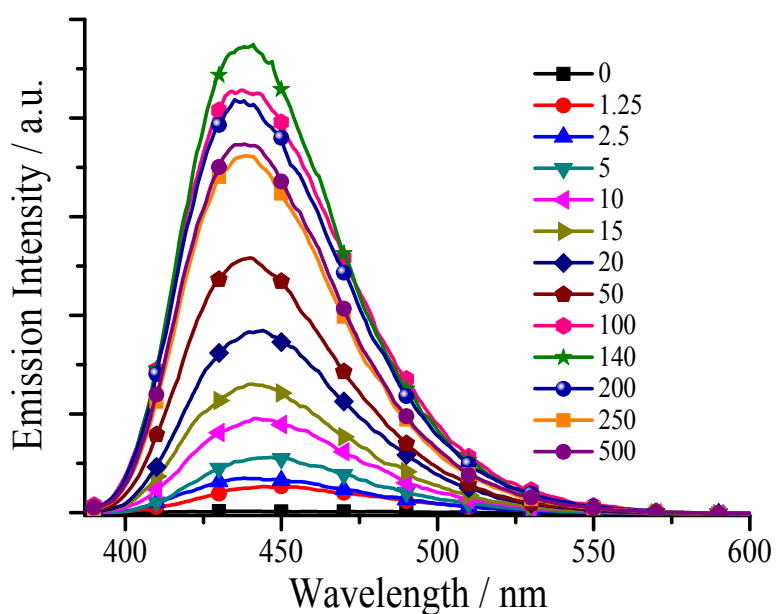

**Fig.. S62** Emission spectra of **3,5-Cl-(R,R)diPh** ( $1.0 \times 10^{-5}$  mol dm<sup>-3</sup> in DMSO, excited at 380 nm) upon the addition of different equivalents of L-Ser.

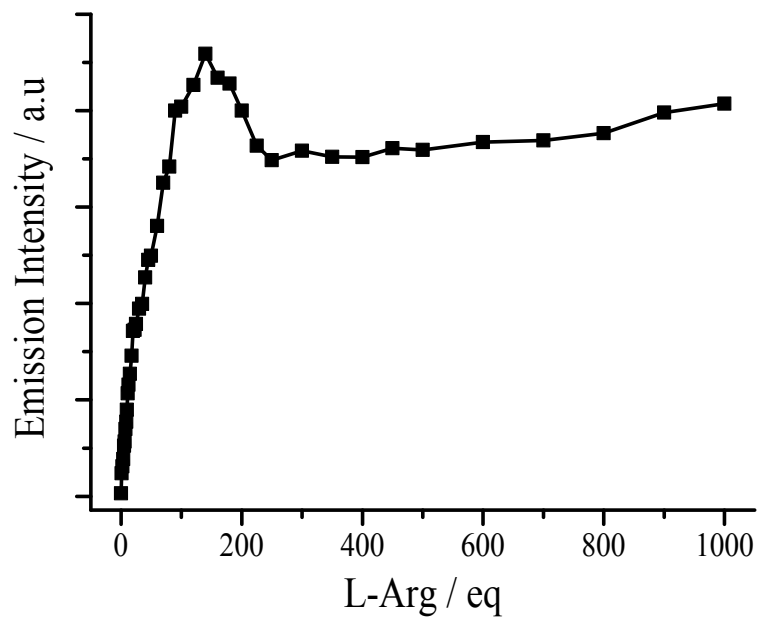

**Fig. S63** Plot of emission intensity of **3,5-Cl-(R,R)diPh** ( $1.0 \times 10^{-5}$  mol dm<sup>-3</sup> in DMSO) at 440 nm (excited at 380 nm) as a function of L-Ser concentration.

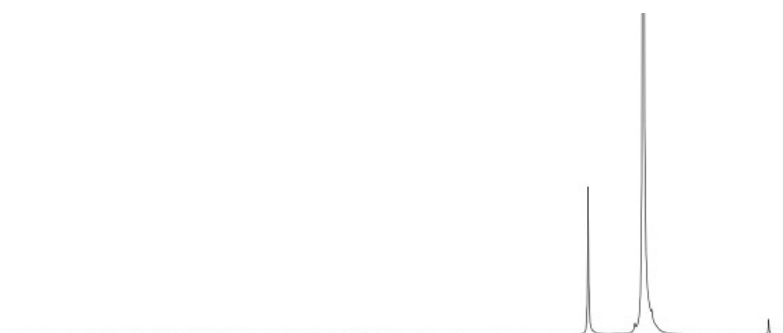

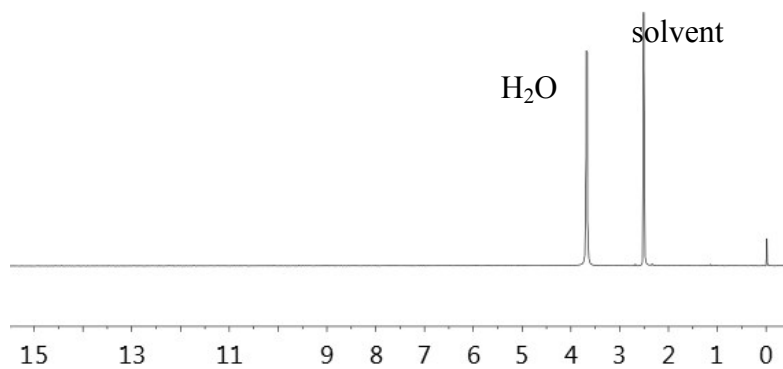

**Fig. S64** <sup>1</sup>H NMR spectra of OH<sup>-</sup> (top) and F<sup>-</sup> (bottom) in DMSO-d<sub>6</sub>.

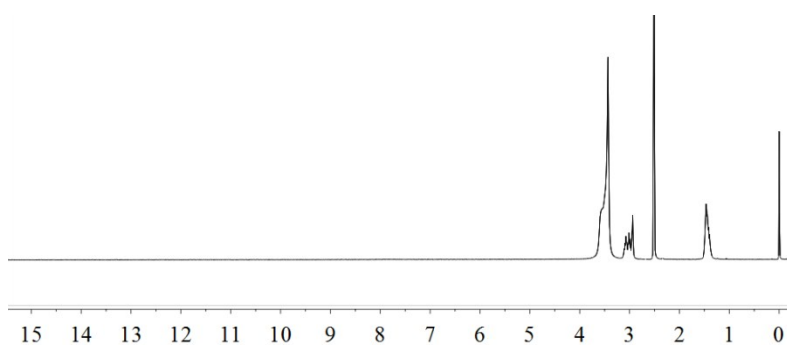

**Fig. S65** <sup>1</sup>H NMR spectra of L-Arg in DMSO-d<sub>6</sub>.

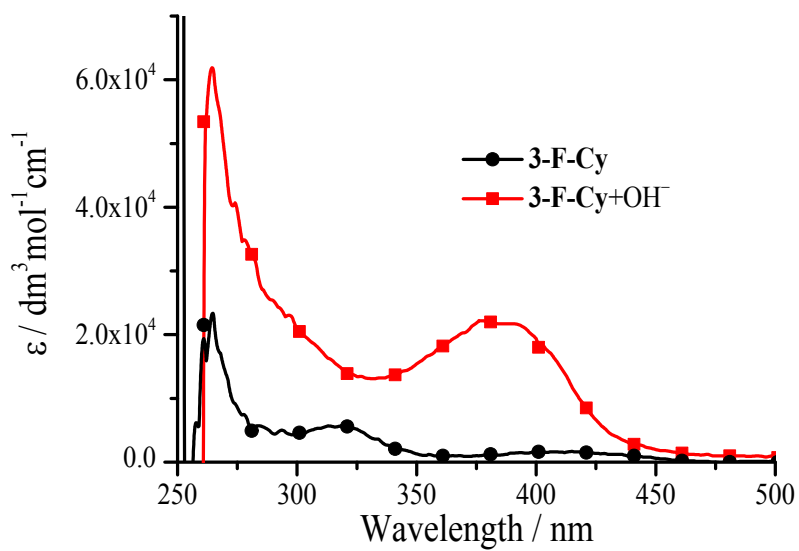

**Fig. S66** Absorption spectra of **3-F-Cy** ( $1.0 \times 10^{-5} \text{ mol dm}^{-3}$  in DMSO) upon the addition of 100 equivalent of OH<sup>-</sup>.
